# Supplementary material for: Lower limb kinetic comparisons between the chasse step and one step footwork during stroke play in table tennis
Source: PeerJ. 2021 Nov 11;9:e12481. doi: 10.7717/peerj.12481 (PMC8590798; doi:10.7717/peerj.12481)
Supplement: Supplemental Information 1 [file peerj-09-12481-s001.xlsx]

## Sheet: Sheet1
Height (CM)	Weight (KG)	Experience (Year)	Age (Year)
180	82.3	13	25
173.5	70.5	10	21
170.4	68.5	10	22
166.5	62	13	24
174	69.3	9	21
167.5	60	9	22
170.5	63	14	25
172.4	65.5	9	21
175.8	75.1	10	20
172.5	74.5	11	21
169.5	69	11	23
168.5	68.5	10	22
