# Supplementary material for: Lower limb kinetic comparisons between the chasse step and one step footwork during stroke play in table tennis
Source: PeerJ. 2021 Nov 11;9:e12481. doi: 10.7717/peerj.12481 (PMC8590798; doi:10.7717/peerj.12481)
Supplement: Supplemental Information 2 [file peerj-09-12481-s002.xlsx]

## Sheet: chasse step in the BP phase
0.00758317	0.4511	0.194045	0.00866648	0.241303	0.279124	0.0249161	0.031416	0.0162497	0.324036	0.0222072	0.520723	0.434407	0.00433324	0.413268	0.555832	0.00433324	0.0929972	0.0954942	0.0431713	0.00882353	0.0191477	0.0191477	0.27561	0.185274	0.0566226	0.147019	0.0426631	0.0558924	0.0216987	0.0216687	0.0305682	0.886877	1.08102	0.38992	0.0234607	0.23335	0.29716	1.0965	0.199495	0.841555	1.14623	0.706084	0.283639	0.00721204	0.959936	0.0128381	0.0587945
0.223163	0.510465	0.439419	0.21635	0.464331	0.452762	0.236606	0.244452	0.174452	0.508812	0.208087	0.618696	0.509983	0.211386	0.533946	0.619943	0.178712	0.479034	0.41221	0.349364	0.162334	0.118116	0.165705	0.66461	0.533905	0.305717	0.477024	0.200972	0.352745	0.195195	0.112984	0.184617	0.935531	1.11862	0.525295	0.153893	0.377283	0.450009	1.12995	0.335383	0.91173	1.1707	0.804084	0.461776	0.0984638	1.00174	0.133561	0.253445
0.438743	0.56983	0.684792	0.424033	0.68736	0.626401	0.448296	0.457488	0.332655	0.693588	0.393967	0.716669	0.585559	0.418439	0.654624	0.684054	0.35309	0.865071	0.728925	0.655557	0.315845	0.217084	0.312262	1.05361	0.882535	0.55481	0.807029	0.359282	0.649599	0.368691	0.204299	0.338665	0.984186	1.15623	0.660669	0.284325	0.521216	0.602857	1.1634	0.471271	0.981905	1.19517	0.902084	0.639912	0.189715	1.04354	0.254284	0.448095
0.593445	0.629195	0.882056	0.620784	0.823131	0.787379	0.627592	0.638816	0.468335	0.826318	0.550361	0.791161	0.597345	0.578116	0.775302	0.695789	0.527468	1.25111	1.04564	0.953512	0.469355	0.316053	0.492898	1.42114	1.15412	0.803904	1.13703	0.557885	0.916301	0.550559	0.295614	0.492714	1.03284	1.19383	0.796043	0.414757	0.665149	0.755706	1.19684	0.607158	1.05208	1.21963	1.00008	0.818049	0.280967	1.08534	0.375007	0.642745
0.66578	0.586445	0.781039	0.637146	0.744724	0.73945	0.606046	0.623561	0.464375	0.770385	0.523943	0.720072	0.522828	0.621508	0.730824	0.613996	0.573864	1.31713	1.12133	1.11553	0.638609	0.542194	0.79707	1.43448	1.14643	0.971727	1.27707	0.85539	0.996069	0.870572	0.639426	0.754459	1.0815	1.23144	0.931417	0.545189	0.809082	0.908555	1.23029	0.743046	1.12225	1.2441	1.09808	0.996186	0.372219	1.12715	0.49573	0.837395
0.738115	0.540601	0.680023	0.653509	0.666317	0.691521	0.584501	0.608306	0.460415	0.714452	0.497525	0.648983	0.448311	0.6649	0.681342	0.532202	0.616381	1.326	1.11669	1.27755	0.813109	0.83828	1.10124	1.44781	1.13873	1.13709	1.25089	1.1529	1.07584	1.19059	0.990891	1.01947	1.13015	1.26904	1.06679	0.675621	0.953014	1.0614	1.26374	0.878934	1.19243	1.26856	1.19608	1.17432	0.463471	1.16895	0.616453	1.03205
0.694575	0.494757	0.602119	0.662404	0.618364	0.644853	0.555806	0.581312	0.445139	0.664603	0.461182	0.594212	0.426943	0.644082	0.63186	0.502752	0.658898	1.33488	1.11204	1.43189	0.98761	1.13437	1.2948	1.4601	1.14735	1.30245	1.2247	1.30416	1.14006	1.47498	1.34235	1.28448	1.16988	1.30665	1.20217	0.799638	1.08105	1.21425	1.29719	1.01482	1.2626	1.29303	1.15616	1.35246	0.575667	1.17905	0.731201	1.20715
0.630586	0.492628	0.584308	0.613432	0.592561	0.607949	0.508524	0.523799	0.400443	0.622739	0.399032	0.581869	0.414954	0.576565	0.617226	0.493865	0.605514	1.34664	1.12629	1.52672	1.08977	1.35631	1.34319	1.46426	1.17738	1.3284	1.20045	1.34906	1.16386	1.48332	1.37447	1.32246	1.1382	1.32466	1.29405	0.872342	1.08187	1.26505	1.2732	1.10835	1.26857	1.31749	1.11624	1.36561	0.716664	1.14556	0.837733	1.22587
0.583437	0.493232	0.566498	0.564459	0.566758	0.571045	0.461241	0.466286	0.355746	0.580875	0.336883	0.569526	0.410735	0.509049	0.604771	0.485849	0.546136	1.35965	1.15943	1.62155	1.11959	1.39702	1.39157	1.46842	1.20741	1.34564	1.20316	1.39397	1.18766	1.49165	1.38664	1.34625	1.10651	1.29957	1.29028	0.945045	1.0827	1.28445	1.23154	1.10869	1.25479	1.33319	1.07632	1.328	0.85766	1.11207	0.944265	1.2446
0.580686	0.493835	0.563211	0.52465	0.559083	0.540195	0.44243	0.432343	0.329805	0.563187	0.301016	0.55538	0.427	0.51674	0.592316	0.488269	0.486757	1.37266	1.19257	1.69065	1.14941	1.43772	1.43699	1.46279	1.22794	1.36288	1.20587	1.41932	1.22621	1.5172	1.3988	1.37004	1.07483	1.27448	1.2865	1.01775	1.08352	1.30385	1.18988	1.10902	1.241	1.32697	1.0364	1.29039	0.998656	1.07858	1.0508	1.26333
0.577936	0.48544	0.580259	0.529134	0.554155	0.538611	0.463478	0.431398	0.330122	0.558595	0.301946	0.538709	0.443266	0.535826	0.600367	0.490688	0.464211	1.42059	1.24045	1.63538	1.20026	1.47843	1.48079	1.40988	1.24332	1.40196	1.20858	1.44171	1.28542	1.62594	1.37662	1.3606	1.04315	1.24939	1.28272	1.09045	1.08434	1.32325	1.14821	1.10936	1.22722	1.32075	0.99648	1.25278	1.13965	1.04509	1.15733	1.28205
0.566251	0.476173	0.597306	0.533618	0.547668	0.537027	0.484527	0.430452	0.330439	0.554003	0.302876	0.522038	0.44748	0.553159	0.610402	0.490389	0.445229	1.49762	1.33253	1.5801	1.31418	1.50738	1.52459	1.35697	1.25871	1.44315	1.25388	1.45755	1.34463	1.73468	1.35112	1.34793	1.01146	1.2243	1.27894	1.16316	1.08517	1.34265	1.10655	1.1097	1.21343	1.31452	1.0079	1.21517	1.28065	1.0116	1.26386	1.30078
0.550736	0.466907	0.603508	0.53809	0.532873	0.532315	0.499571	0.425352	0.332588	0.545172	0.313988	0.504204	0.44653	0.561143	0.620437	0.486572	0.426248	1.57465	1.42462	1.52575	1.42811	1.53552	1.46632	1.31485	1.31748	1.48434	1.32758	1.43844	1.37824	1.80654	1.32562	1.33527	0.990083	1.1992	1.27517	1.21505	1.08037	1.36205	1.06489	1.11003	1.19964	1.3083	1.01932	1.17755	1.26983	1.01418	1.25738	1.31159
0.534609	0.447267	0.601035	0.542522	0.518077	0.517048	0.509811	0.416928	0.336201	0.535678	0.333247	0.48544	0.446732	0.569127	0.609571	0.482754	0.434727	1.60822	1.5167	1.47454	1.54203	1.56366	1.39211	1.30914	1.38302	1.46299	1.40128	1.41932	1.39137	1.75397	1.41409	1.35978	1.00476	1.17411	1.27139	1.1941	1.0559	1.37014	1.06831	1.11037	1.20467	1.30208	1.03074	1.16279	1.23055	1.02353	1.22972	1.2947
0.514197	0.426245	0.598561	0.546953	0.50947	0.50178	0.520051	0.408504	0.339814	0.52715	0.352505	0.466676	0.454997	0.570117	0.595919	0.484223	0.446868	1.57492	1.53803	1.42333	1.54768	1.55537	1.32596	1.30343	1.44413	1.4333	1.4613	1.41471	1.4045	1.7014	1.51775	1.38925	1.01944	1.18395	1.27687	1.17316	1.03142	1.36817	1.11181	1.10194	1.22641	1.29586	1.04216	1.16833	1.19127	1.03287	1.20205	1.27781
0.493784	0.405223	0.590489	0.545917	0.508506	0.487955	0.523322	0.407125	0.337955	0.52957	0.364038	0.462614	0.463262	0.562466	0.582266	0.487056	0.459009	1.54162	1.55936	1.40138	1.55333	1.52077	1.35135	1.30525	1.45505	1.40361	1.43241	1.42799	1.39283	1.66038	1.62142	1.41871	1.03411	1.21476	1.28792	1.15222	1.00695	1.36619	1.1553	1.08826	1.24816	1.28963	1.05358	1.17388	1.15199	1.04222	1.17438	1.26093
0.493086	0.402597	0.579953	0.531212	0.507543	0.477736	0.523525	0.408848	0.333687	0.53199	0.372172	0.465021	0.479286	0.554816	0.579403	0.494244	0.461333	1.5099	1.58069	1.45258	1.55898	1.48616	1.37674	1.32592	1.46598	1.41074	1.40352	1.44128	1.37024	1.64824	1.6217	1.43223	1.04879	1.24556	1.29897	1.13127	0.982478	1.36422	1.1988	1.07458	1.2699	1.29759	1.08437	1.17942	1.11271	1.05157	1.14671	1.24404
0.508518	0.403142	0.569417	0.516506	0.539941	0.467518	0.523729	0.41057	0.32942	0.545213	0.380305	0.467428	0.501659	0.568361	0.5784	0.525381	0.461965	1.48312	1.57165	1.50378	1.52982	1.46539	1.40588	1.34658	1.47952	1.42421	1.37462	1.47375	1.34765	1.6361	1.60415	1.443	1.06347	1.27636	1.31001	1.11033	0.958005	1.36225	1.24229	1.0609	1.29165	1.31618	1.11517	1.18497	1.08975	1.06764	1.13083	1.22715
0.52395	0.403688	0.576535	0.507265	0.584254	0.4702	0.520431	0.430426	0.341065	0.583969	0.38842	0.49182	0.524033	0.589477	0.577397	0.556518	0.462597	1.45633	1.55249	1.54745	1.48906	1.49207	1.4439	1.36388	1.49927	1.43769	1.37202	1.51307	1.37254	1.62882	1.58661	1.45378	1.08073	1.30716	1.32106	1.10363	0.953689	1.36028	1.28579	1.04722	1.31339	1.33476	1.14596	1.19051	1.11248	1.10254	1.14793	1.23005
0.545515	0.42464	0.587183	0.508496	0.628119	0.497608	0.516433	0.453908	0.355893	0.622726	0.396531	0.52061	0.528846	0.610681	0.588534	0.586924	0.469831	1.4331	1.53332	1.57671	1.4483	1.51874	1.48193	1.37471	1.51901	1.47184	1.38256	1.5518	1.40692	1.63086	1.59497	1.48255	1.10314	1.33796	1.3321	1.12542	0.989688	1.36502	1.32391	1.03354	1.33343	1.35335	1.17676	1.20093	1.13522	1.13745	1.16504	1.27252
0.567237	0.449965	0.597831	0.509728	0.655456	0.525017	0.512436	0.477391	0.37072	0.654349	0.404642	0.549399	0.533208	0.635176	0.602272	0.616636	0.478479	1.44547	1.52932	1.60597	1.42461	1.54542	1.49959	1.38555	1.53376	1.51043	1.3931	1.56878	1.4413	1.63289	1.60889	1.51518	1.12556	1.36876	1.34315	1.14721	1.02569	1.3859	1.34916	1.01986	1.34936	1.37194	1.20755	1.22305	1.15795	1.17236	1.18214	1.31499
0.584063	0.475291	0.613479	0.517437	0.682792	0.547891	0.529699	0.516274	0.398762	0.679214	0.427388	0.583478	0.536096	0.65967	0.61601	0.646347	0.487128	1.45784	1.54048	1.61972	1.418	1.58213	1.49796	1.3924	1.54376	1.54901	1.40643	1.58577	1.47781	1.62616	1.62281	1.54781	1.14798	1.39115	1.36763	1.169	1.06169	1.40677	1.3744	1.05163	1.36529	1.39052	1.2185	1.24517	1.18068	1.20726	1.19924	1.35747
0.593544	0.493917	0.629269	0.534861	0.701124	0.563962	0.547569	0.555597	0.427181	0.704078	0.450552	0.617709	0.536771	0.67623	0.634364	0.646717	0.487491	1.4702	1.55164	1.61022	1.41139	1.62033	1.49633	1.39329	1.55375	1.56696	1.43093	1.59212	1.51439	1.60626	1.63356	1.56547	1.17039	1.41297	1.39301	1.19079	1.09769	1.42764	1.39965	1.08644	1.38122	1.40911	1.22946	1.2673	1.20342	1.24217	1.21635	1.39994
0.603026	0.510808	0.644292	0.552286	0.699945	0.580034	0.56418	0.593688	0.456169	0.706625	0.470271	0.650015	0.537446	0.675599	0.653914	0.642772	0.485706	1.48354	1.56277	1.60072	1.41314	1.65853	1.49877	1.39417	1.55411	1.57956	1.45542	1.57543	1.54757	1.58637	1.64349	1.57925	1.19281	1.4348	1.41839	1.21258	1.13368	1.44851	1.4249	1.12124	1.39716	1.4277	1.24041	1.28942	1.24219	1.26567	1.24293	1.44241
0.622027	0.527698	0.65318	0.57829	0.698767	0.59217	0.570713	0.62192	0.48971	0.700907	0.462428	0.666923	0.536517	0.674967	0.673464	0.640211	0.483921	1.49695	1.57381	1.59793	1.43999	1.68126	1.50272	1.40207	1.55089	1.59216	1.47992	1.55874	1.55359	1.56983	1.65342	1.59302	1.2115	1.45662	1.44377	1.23992	1.16841	1.46938	1.45014	1.15604	1.41309	1.43708	1.25136	1.31154	1.28836	1.28392	1.2739	1.47434
0.643048	0.538332	0.662069	0.614483	0.697952	0.599633	0.577246	0.650152	0.523251	0.695189	0.454586	0.683831	0.535249	0.674728	0.68085	0.642261	0.489979	1.51035	1.58484	1.60313	1.46684	1.68948	1.50666	1.4183	1.54768	1.60368	1.48428	1.54659	1.55962	1.55725	1.64999	1.59914	1.22552	1.47845	1.46914	1.2742	1.20155	1.48816	1.47445	1.19085	1.42867	1.44493	1.26231	1.33347	1.33453	1.30217	1.30486	1.4931
0.661841	0.547041	0.672323	0.650676	0.697374	0.607096	0.583683	0.675963	0.549037	0.696195	0.448096	0.694603	0.533396	0.674744	0.684493	0.644312	0.49845	1.51191	1.59588	1.60832	1.49369	1.6977	1.50257	1.43453	1.53283	1.61487	1.48132	1.5374	1.56619	1.54468	1.64245	1.6029	1.23955	1.50027	1.49452	1.30848	1.23468	1.47338	1.4837	1.22565	1.43865	1.45278	1.25326	1.35234	1.3807	1.32041	1.33582	1.51187
0.67395	0.55575	0.686677	0.681732	0.696797	0.613905	0.589834	0.694507	0.551558	0.697584	0.445661	0.686964	0.529785	0.674761	0.688137	0.63891	0.50692	1.51029	1.59586	1.60749	1.48962	1.70368	1.49801	1.44406	1.51732	1.62605	1.47836	1.52821	1.57441	1.53399	1.63491	1.60666	1.25357	1.51904	1.51554	1.34276	1.26782	1.4586	1.49295	1.25589	1.44862	1.46062	1.2442	1.37122	1.42686	1.33866	1.36678	1.53063
0.686059	0.56565	0.701031	0.707937	0.699349	0.620097	0.595985	0.713052	0.554079	0.699007	0.443227	0.679326	0.526174	0.672601	0.696971	0.628321	0.51786	1.50866	1.59585	1.60096	1.48555	1.69798	1.49227	1.44724	1.50261	1.6301	1.4756	1.51358	1.58263	1.5251	1.62765	1.60957	1.26759	1.52862	1.52348	1.37704	1.30095	1.44381	1.50221	1.27243	1.4586	1.46847	1.23515	1.3901	1.47034	1.35551	1.39576	1.54939
0.699217	0.575978	0.713486	0.734142	0.70227	0.626288	0.600958	0.7235	0.55569	0.700602	0.439673	0.672424	0.52328	0.670185	0.707675	0.617733	0.529688	1.50947	1.59584	1.59443	1.48149	1.69228	1.48036	1.45043	1.49205	1.63157	1.47338	1.49831	1.58777	1.5162	1.62049	1.61216	1.28161	1.5382	1.53141	1.41132	1.33409	1.42903	1.51146	1.28897	1.46858	1.47632	1.2261	1.40897	1.49094	1.36053	1.40787	1.56815
0.712881	0.586307	0.722956	0.753204	0.705676	0.628003	0.604077	0.721225	0.555874	0.702196	0.43436	0.666679	0.520731	0.668439	0.718378	0.619366	0.541517	1.51167	1.59058	1.58407	1.4771	1.68659	1.46846	1.44683	1.48148	1.63304	1.47117	1.48256	1.58808	1.50199	1.61333	1.61475	1.28964	1.54778	1.53935	1.4369	1.3555	1.41425	1.52071	1.30551	1.47855	1.48417	1.21704	1.42785	1.51154	1.36554	1.41997	1.58226
0.725199	0.588331	0.732426	0.766907	0.711235	0.626359	0.607197	0.71895	0.556057	0.704074	0.429047	0.660935	0.518692	0.669663	0.724535	0.621658	0.551812	1.51386	1.58358	1.57082	1.4726	1.68089	1.45455	1.43814	1.46988	1.62708	1.46895	1.46467	1.58839	1.4838	1.60291	1.60661	1.29285	1.55736	1.54729	1.45553	1.36752	1.39947	1.52997	1.32205	1.48853	1.49138	1.21216	1.44672	1.53214	1.37056	1.43208	1.59265
0.72541	0.586895	0.744592	0.78061	0.716795	0.624716	0.614847	0.715555	0.55635	0.706419	0.428377	0.662065	0.521235	0.670887	0.728797	0.624445	0.561469	1.51822	1.57657	1.55758	1.4681	1.67519	1.43737	1.42946	1.45658	1.61803	1.45948	1.44679	1.58395	1.46562	1.59113	1.59399	1.29607	1.56694	1.55522	1.47417	1.37954	1.40525	1.52952	1.33859	1.48883	1.49475	1.20727	1.45691	1.55274	1.37558	1.44418	1.60304
0.725622	0.585459	0.75917	0.791745	0.720803	0.63078	0.62655	0.711158	0.556743	0.708764	0.431863	0.669346	0.523778	0.673361	0.733059	0.628342	0.571125	1.52488	1.56539	1.53928	1.45933	1.66949	1.42018	1.41622	1.44327	1.60899	1.44819	1.43168	1.57527	1.45069	1.57935	1.58136	1.29929	1.57652	1.56316	1.4928	1.39157	1.41542	1.527	1.35513	1.48706	1.49813	1.20239	1.46523	1.57333	1.3806	1.45629	1.61342
0.729835	0.587329	0.773747	0.801361	0.723087	0.641398	0.638253	0.706761	0.557135	0.710308	0.435349	0.676627	0.528219	0.677224	0.741666	0.632239	0.578049	1.53154	1.55003	1.518	1.44631	1.65597	1.40327	1.40028	1.42857	1.59811	1.43691	1.41967	1.56659	1.4377	1.56512	1.57358	1.30251	1.57865	1.57079	1.51143	1.40359	1.4256	1.52448	1.36824	1.4853	1.5015	1.19751	1.47355	1.58377	1.38093	1.45921	1.62381
0.737667	0.590779	0.785699	0.810977	0.725372	0.652016	0.650055	0.711053	0.558682	0.711306	0.443038	0.679176	0.534378	0.681088	0.752352	0.63368	0.583667	1.53281	1.53467	1.49672	1.43328	1.63297	1.38656	1.38435	1.41291	1.58637	1.42611	1.40765	1.55298	1.4247	1.54971	1.56811	1.30573	1.57498	1.57817	1.53006	1.41562	1.43578	1.52196	1.3787	1.48353	1.50488	1.19262	1.48188	1.58507	1.37704	1.45386	1.6342
0.745499	0.594229	0.796337	0.81282	0.725197	0.655352	0.661906	0.71969	0.560805	0.712304	0.452827	0.679359	0.540536	0.681214	0.763037	0.633892	0.589284	1.52333	1.51919	1.47532	1.42205	1.60996	1.36984	1.36238	1.39724	1.57463	1.4163	1.39311	1.53691	1.40634	1.53431	1.56264	1.3083	1.57131	1.58555	1.5377	1.42307	1.44595	1.51944	1.38916	1.48176	1.50826	1.19136	1.4902	1.58636	1.37315	1.4485	1.63309
0.748312	0.601915	0.806975	0.811101	0.72426	0.65535	0.673758	0.728328	0.562929	0.708494	0.462617	0.679542	0.541087	0.68018	0.770316	0.634212	0.595041	1.51384	1.50337	1.45386	1.41618	1.58709	1.35216	1.33766	1.37423	1.55931	1.40649	1.37778	1.52085	1.38551	1.51963	1.55202	1.31055	1.56764	1.59294	1.53985	1.42824	1.45613	1.51692	1.39961	1.47999	1.51163	1.1901	1.49853	1.58765	1.36926	1.44315	1.62624
0.75086	0.61191	0.816326	0.809381	0.723378	0.655347	0.679951	0.734796	0.569375	0.703563	0.476299	0.677732	0.541342	0.67965	0.775737	0.638598	0.600873	1.502	1.48754	1.4324	1.41032	1.56543	1.33425	1.31293	1.34951	1.54203	1.39667	1.36219	1.49602	1.36469	1.50534	1.53858	1.31279	1.56397	1.60032	1.542	1.43341	1.46191	1.50718	1.41007	1.4747	1.51501	1.18883	1.49831	1.58895	1.36537	1.4378	1.61939
0.752933	0.621905	0.825365	0.814533	0.723494	0.65813	0.684778	0.740741	0.576865	0.698665	0.49092	0.675441	0.542652	0.688184	0.781158	0.642984	0.606706	1.47953	1.47172	1.40705	1.40446	1.54377	1.31628	1.28833	1.32455	1.52476	1.38478	1.34191	1.46907	1.33838	1.49105	1.52514	1.31504	1.5603	1.6077	1.54414	1.43858	1.46461	1.4924	1.42053	1.46695	1.51735	1.18757	1.49211	1.59024	1.36148	1.43245	1.61253
0.754212	0.631108	0.834404	0.822063	0.72361	0.661877	0.689605	0.746685	0.584355	0.694942	0.505541	0.673149	0.545722	0.696719	0.780659	0.647762	0.621734	1.45706	1.45183	1.38036	1.3879	1.52211	1.29631	1.26377	1.29151	1.50256	1.37258	1.32163	1.44213	1.31019	1.47253	1.50858	1.31729	1.55663	1.61508	1.54629	1.44375	1.46731	1.47761	1.43098	1.4592	1.5183	1.18631	1.48592	1.57697	1.35047	1.42045	1.60568
0.755492	0.639819	0.840525	0.829593	0.726098	0.665623	0.705279	0.748463	0.587315	0.69122	0.526475	0.669238	0.548792	0.704946	0.776496	0.653164	0.642455	1.43467	1.43194	1.35368	1.37135	1.49927	1.27635	1.23921	1.25846	1.47731	1.36037	1.30007	1.417	1.28199	1.45138	1.49008	1.31953	1.54644	1.60897	1.54844	1.44892	1.47001	1.46283	1.43117	1.45145	1.51926	1.1774	1.47972	1.5629	1.33906	1.40808	1.59883
0.757443	0.648531	0.846473	0.828753	0.733147	0.668777	0.721592	0.749996	0.59001	0.688269	0.547781	0.665232	0.547921	0.71258	0.772332	0.658567	0.663176	1.41488	1.41205	1.32699	1.3548	1.47602	1.2545	1.21629	1.22726	1.45207	1.34362	1.27606	1.39199	1.25513	1.43023	1.47158	1.31892	1.53532	1.60092	1.53795	1.43709	1.4727	1.44805	1.42988	1.4437	1.52021	1.1685	1.47352	1.54882	1.32766	1.39571	1.58046
0.759562	0.653976	0.851796	0.825821	0.740197	0.671782	0.737256	0.751593	0.592607	0.687719	0.569259	0.661474	0.546064	0.720214	0.773618	0.665231	0.678566	1.39508	1.38306	1.30031	1.32825	1.45277	1.22679	1.19376	1.20181	1.42568	1.32004	1.25205	1.36665	1.2286	1.40391	1.45527	1.31749	1.5242	1.59287	1.52385	1.4204	1.4754	1.43326	1.42859	1.43594	1.52117	1.15959	1.46733	1.53474	1.31625	1.38334	1.5588
0.760489	0.657134	0.85024	0.822889	0.743314	0.674787	0.745772	0.753898	0.594133	0.687169	0.592623	0.660447	0.548631	0.71999	0.778717	0.67233	0.690225	1.37528	1.35105	1.27362	1.29837	1.42674	1.19908	1.17124	1.17635	1.39851	1.29646	1.22503	1.33784	1.20207	1.37396	1.44048	1.31606	1.51307	1.58482	1.50975	1.40371	1.47033	1.41629	1.42731	1.42557	1.52213	1.15068	1.45495	1.52066	1.30485	1.37097	1.53715
0.757312	0.660292	0.848683	0.818792	0.744136	0.678543	0.754289	0.756203	0.595658	0.68872	0.615987	0.659419	0.566435	0.715184	0.783817	0.679709	0.701883	1.35139	1.31904	1.24678	1.26849	1.39628	1.17242	1.14218	1.14846	1.37133	1.27288	1.19626	1.30903	1.16973	1.34401	1.42569	1.31464	1.50195	1.57678	1.49565	1.38701	1.45101	1.39532	1.42602	1.41038	1.52308	1.14178	1.43126	1.50374	1.28966	1.35691	1.51549
0.754135	0.662852	0.847171	0.8145	0.744959	0.682424	0.761725	0.758253	0.597741	0.692743	0.638922	0.658468	0.584238	0.710377	0.785042	0.689532	0.711559	1.32693	1.28733	1.21991	1.23577	1.36582	1.14701	1.11202	1.11773	1.34181	1.24478	1.1675	1.27968	1.13641	1.31454	1.40751	1.31321	1.49083	1.56873	1.48155	1.37032	1.43169	1.37435	1.42474	1.3952	1.52404	1.12605	1.40756	1.48193	1.26798	1.33995	1.49383
0.751683	0.664938	0.845813	0.810208	0.745954	0.686304	0.765378	0.75941	0.601774	0.696766	0.660356	0.65778	0.596698	0.714877	0.783208	0.699355	0.719669	1.30248	1.25592	1.19304	1.20023	1.33546	1.1216	1.08187	1.08699	1.31044	1.21636	1.13512	1.24848	1.1031	1.28546	1.38664	1.31178	1.47837	1.55753	1.46745	1.35363	1.41236	1.35338	1.42151	1.38002	1.51406	1.11032	1.38386	1.46013	1.2463	1.32299	1.47217
0.749622	0.667025	0.844456	0.806562	0.746964	0.696342	0.769032	0.760566	0.605806	0.696151	0.681791	0.657093	0.606281	0.720175	0.781375	0.705597	0.727779	1.2808	1.22452	1.16379	1.16468	1.30807	1.09487	1.05709	1.05587	1.27907	1.18794	1.10244	1.21728	1.07463	1.25637	1.36578	1.29741	1.46014	1.53266	1.44514	1.32732	1.39304	1.33241	1.40983	1.36483	1.4997	1.09458	1.36017	1.43833	1.22462	1.30604	1.44272
0.747672	0.674073	0.841153	0.802976	0.747417	0.706957	0.772125	0.761378	0.61165	0.693309	0.699968	0.660502	0.614534	0.72041	0.778024	0.707659	0.740662	1.26016	1.19285	1.13432	1.13021	1.28067	1.06749	1.03282	1.02457	1.24791	1.16147	1.07072	1.18439	1.04663	1.22528	1.33988	1.28142	1.4419	1.50779	1.4218	1.2998	1.37372	1.31144	1.39816	1.34965	1.48535	1.07885	1.33647	1.41652	1.20294	1.28908	1.41228
0.747099	0.685531	0.834409	0.79939	0.745783	0.717572	0.774228	0.76158	0.620697	0.690467	0.712382	0.67116	0.606376	0.70166	0.773324	0.709722	0.757788	1.23952	1.1604	1.10484	1.09896	1.25328	1.04012	1.00855	0.993264	1.21694	1.13723	1.04264	1.14852	1.01862	1.19241	1.30951	1.26542	1.42367	1.48291	1.39846	1.27229	1.3533	1.28985	1.38649	1.33344	1.47099	1.06312	1.31198	1.39472	1.18126	1.27212	1.38185
0.746526	0.69699	0.827666	0.801309	0.744149	0.731791	0.776332	0.761781	0.629744	0.685479	0.724797	0.681818	0.598218	0.682911	0.768625	0.718528	0.774915	1.21736	1.12794	1.07119	1.06771	1.22467	1.01309	0.989063	0.96045	1.18597	1.113	1.01455	1.11264	0.9888	1.15954	1.27914	1.24943	1.40543	1.45804	1.37512	1.24477	1.32464	1.26362	1.37482	1.30951	1.45663	1.04553	1.28152	1.36756	1.1538	1.24694	1.35142
0.745201	0.705297	0.821216	0.803391	0.740296	0.746116	0.770767	0.762709	0.63843	0.680232	0.72925	0.686784	0.597783	0.665507	0.766401	0.728809	0.789551	1.19408	1.09549	1.03742	1.03645	1.19548	0.986101	0.96972	0.927453	1.15501	1.08877	0.98815	1.0822	0.958929	1.12615	1.24995	1.23344	1.3872	1.43317	1.35178	1.21725	1.29597	1.23738	1.36315	1.28557	1.44228	1.02794	1.25105	1.33898	1.1248	1.21956	1.32099
0.743123	0.710453	0.81506	0.805045	0.734222	0.760402	0.757536	0.764364	0.646755	0.675663	0.725742	0.686057	0.605071	0.649447	0.766653	0.738274	0.801698	1.17079	1.0667	1.00358	1.00953	1.16628	0.958758	0.950306	0.895202	1.12405	1.06279	0.963429	1.05719	0.929366	1.09224	1.22195	1.21745	1.36896	1.4083	1.32844	1.18974	1.26731	1.21115	1.35148	1.26164	1.42792	1.01035	1.22059	1.3104	1.0958	1.19218	1.29056
0.741045	0.71561	0.808905	0.792124	0.728149	0.773353	0.744304	0.76602	0.65508	0.67669	0.722234	0.685331	0.612359	0.633388	0.766906	0.744006	0.813845	1.15165	1.03792	0.967599	0.982605	1.13705	0.928483	0.928455	0.869103	1.0931	1.03682	0.938708	1.03217	0.910263	1.05832	1.19395	1.19681	1.34474	1.37913	1.29597	1.15739	1.23865	1.18491	1.33431	1.23771	1.41357	0.992762	1.19013	1.28181	1.0668	1.1648	1.25398
0.74446	0.719842	0.801722	0.779204	0.72833	0.786303	0.732231	0.765451	0.660509	0.677717	0.716386	0.685861	0.617451	0.626493	0.768509	0.749738	0.816087	1.13812	1.00913	0.931614	0.955681	1.10774	0.898207	0.906603	0.843004	1.06295	1.01085	0.911455	1.00385	0.891159	1.02925	1.16533	1.17617	1.31452	1.34568	1.26351	1.12503	1.20998	1.15868	1.31165	1.21378	1.39114	0.975173	1.15967	1.25323	1.0378	1.13742	1.21739
0.74832	0.723034	0.793959	0.766688	0.730179	0.798089	0.720812	0.763624	0.6643	0.677044	0.709216	0.687102	0.622365	0.622041	0.771632	0.754467	0.807187	1.12459	0.98056	0.895816	0.930226	1.07843	0.866446	0.884633	0.815776	1.03372	0.984011	0.883527	0.973666	0.87184	1.00562	1.13603	1.15553	1.2843	1.31222	1.23104	1.09268	1.18132	1.13244	1.28899	1.18984	1.36871	0.946375	1.12921	1.22326	1.00867	1.10884	1.1808
0.749788	0.726226	0.786195	0.758476	0.732043	0.797452	0.709394	0.761798	0.668091	0.67283	0.702045	0.688343	0.6193	0.617596	0.774755	0.758338	0.798288	1.10863	0.95206	0.862016	0.905261	1.04911	0.831587	0.861394	0.786193	1.00449	0.956415	0.855592	0.943479	0.850216	0.981984	1.10674	1.13489	1.25409	1.27876	1.19857	1.06033	1.15237	1.09973	1.26633	1.16296	1.34628	0.917577	1.09635	1.1881	0.979037	1.0758	1.14422
0.746812	0.724382	0.78467	0.750264	0.73409	0.796814	0.703999	0.75731	0.664635	0.668616	0.697089	0.700796	0.601417	0.613227	0.777168	0.762209	0.784755	1.08615	0.92356	0.828215	0.880296	1.01799	0.796728	0.838156	0.756609	0.975154	0.928818	0.827585	0.914909	0.828593	0.954768	1.07865	1.11426	1.22387	1.2453	1.1661	1.02797	1.12339	1.06615	1.24367	1.13569	1.32385	0.888779	1.06316	1.15293	0.949408	1.04276	1.10763
0.743837	0.716161	0.784926	0.741437	0.736137	0.796705	0.700325	0.752062	0.659108	0.666897	0.692767	0.716453	0.583534	0.608858	0.778682	0.765948	0.765354	1.06367	0.896541	0.794852	0.853435	0.986801	0.769198	0.814193	0.728905	0.945684	0.901588	0.799578	0.886802	0.806782	0.923013	1.05212	1.09325	1.19365	1.21185	1.13401	0.995395	1.0944	1.03258	1.22101	1.10842	1.30142	0.859981	1.02998	1.11777	0.919778	1.00972	1.07105
0.751945	0.707939	0.785183	0.728926	0.734974	0.799768	0.696651	0.746814	0.653581	0.667297	0.688444	0.73211	0.585718	0.606394	0.780197	0.769673	0.745953	1.04149	0.871004	0.764114	0.824678	0.955614	0.747897	0.785885	0.702797	0.916215	0.879484	0.773356	0.858695	0.78385	0.891258	1.02558	1.06929	1.16343	1.17839	1.10492	0.961004	1.06541	0.999006	1.19835	1.08114	1.27899	0.831183	0.996797	1.0826	0.890148	0.976682	1.0345
0.76327	0.70413	0.774404	0.716414	0.72831	0.80283	0.695403	0.742457	0.663873	0.667697	0.688031	0.732739	0.593728	0.607194	0.781619	0.772888	0.72721	1.02145	0.845467	0.733375	0.795921	0.924787	0.726596	0.757577	0.676689	0.887144	0.85738	0.750196	0.828591	0.760918	0.861587	0.996279	1.04533	1.12796	1.14281	1.07583	0.926612	1.03642	0.965431	1.17311	1.05387	1.25656	0.803408	0.963614	1.04744	0.860518	0.943641	0.997945
0.771871	0.706622	0.762623	0.704306	0.721647	0.80413	0.694376	0.738181	0.675604	0.670913	0.687974	0.732001	0.600969	0.607994	0.782911	0.774628	0.709409	1.00142	0.819858	0.703486	0.766596	0.894188	0.708059	0.729719	0.643465	0.858644	0.835276	0.727037	0.798306	0.737537	0.834894	0.96303	1.02137	1.09128	1.10674	1.04674	0.89222	1.00744	0.931857	1.14726	1.02659	1.23245	0.775633	0.93043	1.00696	0.830474	0.907501	0.961393
0.769573	0.709115	0.751021	0.693811	0.721352	0.79838	0.693155	0.733887	0.686629	0.675035	0.687624	0.730817	0.605138	0.607322	0.784203	0.776369	0.691607	0.981385	0.794033	0.676998	0.735567	0.863589	0.69041	0.703665	0.607955	0.830144	0.810992	0.701979	0.767783	0.712358	0.8082	0.92978	0.997411	1.0546	1.07068	1.01765	0.857829	0.980701	0.898546	1.12142	1.00039	1.20416	0.747859	0.898084	0.963394	0.800188	0.869553	0.924842
0.767275	0.703192	0.742478	0.683316	0.724368	0.79263	0.688623	0.729304	0.685652	0.679156	0.68229	0.722042	0.609307	0.605883	0.78058	0.777915	0.675292	0.957658	0.768208	0.650509	0.704538	0.831218	0.672762	0.677612	0.572444	0.800413	0.785253	0.675935	0.733201	0.687178	0.780333	0.895587	0.973452	1.01792	1.03461	0.988555	0.823437	0.955191	0.865379	1.09557	0.974782	1.17587	0.720084	0.866194	0.919823	0.769902	0.831604	0.888291
0.761616	0.683675	0.733934	0.671235	0.727385	0.784375	0.684092	0.724722	0.684674	0.67868	0.676956	0.713268	0.608953	0.604444	0.769016	0.77934	0.661377	0.933816	0.742383	0.623153	0.673509	0.793754	0.651311	0.653405	0.544507	0.768694	0.759515	0.64989	0.69862	0.662515	0.750571	0.859871	0.949128	0.981233	0.998539	0.959054	0.789702	0.929682	0.832211	1.06972	0.94917	1.14758	0.692309	0.834305	0.876253	0.739616	0.793656	0.85391
0.753941	0.664159	0.724486	0.654572	0.722673	0.768881	0.678952	0.721423	0.68123	0.678076	0.671522	0.703414	0.605885	0.603203	0.757452	0.780764	0.647462	0.909973	0.71097	0.593289	0.640387	0.75629	0.629754	0.634533	0.516779	0.736975	0.734171	0.630628	0.666436	0.639342	0.720809	0.824155	0.92353	0.94455	0.962471	0.92812	0.758263	0.904172	0.799044	1.04388	0.923558	1.11929	0.664859	0.802415	0.832682	0.70933	0.755707	0.827126
0.745719	0.645303	0.71129	0.637908	0.717532	0.753387	0.671292	0.723445	0.667566	0.675774	0.665678	0.689089	0.602346	0.601973	0.739795	0.767862	0.632984	0.886181	0.679557	0.563425	0.607265	0.718826	0.609112	0.615662	0.488919	0.705469	0.711387	0.611742	0.644186	0.61617	0.689615	0.789558	0.897932	0.907834	0.927346	0.897186	0.726824	0.878663	0.765877	1.01762	0.897945	1.091	0.637409	0.770525	0.789276	0.679288	0.71802	0.800343
0.727117	0.627657	0.698093	0.621807	0.710071	0.737572	0.663631	0.725467	0.653902	0.666196	0.659834	0.674765	0.589857	0.597511	0.710967	0.754583	0.617475	0.8624	0.648143	0.533488	0.574143	0.687523	0.592394	0.593369	0.460491	0.674353	0.688602	0.591484	0.621936	0.591071	0.655796	0.757014	0.872334	0.870885	0.898823	0.866251	0.695386	0.853153	0.73271	0.9885	0.872333	1.06271	0.609959	0.738636	0.748841	0.653644	0.68504	0.773559
0.708515	0.610011	0.682071	0.606934	0.695139	0.721058	0.653328	0.722973	0.636128	0.656618	0.654356	0.662104	0.577368	0.582635	0.68214	0.740251	0.601965	0.838619	0.617338	0.503389	0.544838	0.656881	0.575677	0.563613	0.432063	0.643238	0.665818	0.566805	0.599279	0.561769	0.621977	0.72447	0.846736	0.833936	0.8703	0.835317	0.663947	0.829436	0.702204	0.959375	0.84762	1.03442	0.582509	0.707627	0.708405	0.628	0.65206	0.746775
0.686275	0.591094	0.660396	0.592061	0.680207	0.704544	0.637742	0.711451	0.610132	0.644229	0.649611	0.652772	0.56778	0.567758	0.64999	0.723816	0.586429	0.812115	0.586735	0.473291	0.516805	0.626239	0.554503	0.533856	0.402927	0.608564	0.642262	0.542126	0.575808	0.532468	0.589963	0.691491	0.821138	0.796988	0.841776	0.804383	0.632509	0.808279	0.675501	0.930251	0.824189	1.00874	0.555059	0.677876	0.667969	0.602356	0.61908	0.719992
0.660015	0.569518	0.638722	0.57476	0.665056	0.693759	0.622155	0.699928	0.584135	0.627718	0.644865	0.64344	0.561399	0.548212	0.610893	0.707381	0.570838	0.784249	0.556132	0.443752	0.488772	0.595832	0.526793	0.504205	0.37275	0.566452	0.61832	0.517689	0.552337	0.507214	0.561722	0.657603	0.794903	0.760039	0.813253	0.776261	0.602205	0.787121	0.648798	0.901127	0.800759	0.985013	0.533762	0.648126	0.627534	0.576711	0.586099	0.693784
0.633755	0.547943	0.617618	0.553353	0.649709	0.692667	0.614982	0.682093	0.562389	0.611207	0.64498	0.629688	0.555017	0.524464	0.571797	0.681581	0.555247	0.756384	0.524354	0.415159	0.462107	0.565618	0.499084	0.474734	0.342574	0.52434	0.594378	0.493468	0.529636	0.488812	0.53348	0.623715	0.767392	0.72309	0.78473	0.753762	0.574172	0.765964	0.622094	0.872003	0.777329	0.961286	0.512465	0.618375	0.587098	0.551067	0.553119	0.668727
0.612016	0.535578	0.59715	0.531945	0.634362	0.691576	0.617211	0.657202	0.545392	0.599297	0.650526	0.610999	0.572513	0.500715	0.53939	0.651617	0.542616	0.726608	0.491401	0.386567	0.436809	0.535404	0.473811	0.445262	0.312092	0.485757	0.570669	0.469248	0.507795	0.47041	0.504224	0.589721	0.739881	0.686142	0.756207	0.731264	0.546138	0.744807	0.595391	0.842878	0.753898	0.937558	0.491167	0.588625	0.550768	0.524587	0.52355	0.64367
0.590779	0.545318	0.576683	0.524713	0.613619	0.696173	0.619439	0.632311	0.528395	0.590188	0.656072	0.592309	0.592662	0.481255	0.523039	0.621792	0.537092	0.695036	0.458448	0.360202	0.411511	0.505665	0.450021	0.415712	0.281424	0.455645	0.547893	0.441569	0.485955	0.449495	0.472532	0.555471	0.71237	0.64989	0.732001	0.708766	0.518104	0.72365	0.568688	0.81321	0.730468	0.913831	0.46987	0.558874	0.518998	0.497179	0.497771	0.618614
0.568025	0.555058	0.571125	0.536381	0.591658	0.708354	0.627278	0.607388	0.530357	0.581079	0.662206	0.583345	0.611684	0.462762	0.506687	0.594526	0.531568	0.663463	0.426981	0.336807	0.385865	0.477903	0.426231	0.386058	0.250756	0.425533	0.525118	0.413109	0.460281	0.425232	0.44084	0.521222	0.68486	0.614533	0.713346	0.686268	0.490071	0.702362	0.542127	0.782843	0.707888	0.890104	0.448573	0.529467	0.487229	0.46977	0.471992	0.593557
0.542122	0.566274	0.575055	0.548049	0.571761	0.720536	0.638685	0.582447	0.544385	0.592537	0.668713	0.580571	0.628367	0.445036	0.492865	0.567261	0.526457	0.628995	0.399972	0.313412	0.359175	0.450141	0.397423	0.356403	0.22453	0.395079	0.502342	0.384527	0.432169	0.400968	0.408347	0.488091	0.657349	0.579177	0.694691	0.66377	0.462037	0.680465	0.51623	0.752475	0.689278	0.866377	0.422552	0.50166	0.45546	0.442361	0.446212	0.5685
0.516219	0.581591	0.578984	0.560393	0.569407	0.728694	0.650093	0.557505	0.558412	0.607977	0.675221	0.577797	0.645051	0.433822	0.486068	0.54577	0.522491	0.589461	0.372963	0.288231	0.332486	0.422379	0.367645	0.327804	0.199165	0.363678	0.482253	0.354903	0.404057	0.377763	0.37363	0.458068	0.627194	0.54382	0.676036	0.641291	0.434725	0.658567	0.490333	0.722107	0.670668	0.842649	0.39653	0.473852	0.42369	0.414953	0.420433	0.542979
0.499742	0.596909	0.585315	0.573455	0.567053	0.732593	0.656289	0.552919	0.568129	0.623021	0.677168	0.587052	0.655779	0.422608	0.479271	0.532581	0.518525	0.549926	0.345954	0.261158	0.305796	0.390748	0.338424	0.300321	0.174073	0.332276	0.46314	0.325279	0.375297	0.355679	0.338913	0.428045	0.593734	0.508464	0.65738	0.618835	0.408315	0.63667	0.464436	0.69174	0.652057	0.82304	0.370509	0.446045	0.391921	0.387544	0.394654	0.516878
0.486407	0.608656	0.592447	0.586516	0.569548	0.736493	0.660747	0.555118	0.576408	0.631145	0.677594	0.600316	0.664523	0.424045	0.472304	0.519391	0.513011	0.512984	0.318811	0.234085	0.283861	0.358374	0.318968	0.272838	0.153785	0.30148	0.444028	0.295661	0.346321	0.333595	0.306634	0.397564	0.560275	0.473108	0.638725	0.59638	0.381905	0.614773	0.438539	0.661372	0.633447	0.804117	0.344487	0.418238	0.367104	0.360835	0.372821	0.490777
0.473217	0.6088	0.599578	0.594339	0.579479	0.734887	0.665205	0.557318	0.584687	0.63927	0.678021	0.613581	0.670121	0.44488	0.464783	0.512633	0.502466	0.48567	0.291668	0.212553	0.261926	0.325999	0.299512	0.25073	0.133497	0.272649	0.423157	0.266051	0.317345	0.314581	0.282276	0.365597	0.526815	0.437751	0.62007	0.573924	0.355495	0.592876	0.412642	0.631004	0.614837	0.785194	0.318466	0.390431	0.343106	0.334208	0.351451	0.464676
0.460715	0.608944	0.599948	0.59775	0.589411	0.728646	0.657875	0.574437	0.582986	0.645437	0.670918	0.61921	0.660895	0.465716	0.457262	0.507805	0.491921	0.458356	0.264525	0.195687	0.239992	0.295612	0.278639	0.233148	0.115363	0.243819	0.397451	0.236441	0.290978	0.298151	0.257918	0.333629	0.493355	0.409183	0.605135	0.551469	0.329085	0.570978	0.386745	0.60332	0.596226	0.76627	0.297384	0.362623	0.319107	0.307581	0.330082	0.438575
0.448212	0.606342	0.599473	0.601161	0.596083	0.722405	0.649072	0.593421	0.580037	0.646319	0.662874	0.623884	0.651668	0.479075	0.448642	0.501245	0.479445	0.430761	0.23952	0.178821	0.223035	0.267344	0.253939	0.215566	0.103046	0.217161	0.371744	0.21166	0.264937	0.281722	0.233173	0.302921	0.459895	0.382877	0.59144	0.529013	0.302675	0.550826	0.36946	0.576529	0.577464	0.747347	0.276301	0.337514	0.295109	0.280954	0.308713	0.412474
0.435926	0.59315	0.598714	0.597959	0.601251	0.708567	0.639894	0.612081	0.576841	0.647201	0.654444	0.628019	0.63462	0.488984	0.435781	0.482913	0.459519	0.39882	0.215229	0.164954	0.207739	0.239076	0.22924	0.198938	0.0907287	0.198879	0.346038	0.189108	0.239096	0.263442	0.206935	0.277069	0.428618	0.356571	0.577744	0.506036	0.281331	0.530782	0.352714	0.549739	0.558692	0.728424	0.255219	0.312573	0.27111	0.254327	0.287343	0.386523
0.423785	0.579958	0.588001	0.590347	0.60642	0.689663	0.617612	0.619407	0.564958	0.641353	0.63253	0.613266	0.612357	0.498894	0.42292	0.46458	0.439593	0.366878	0.190937	0.153087	0.192442	0.212381	0.209429	0.182945	0.0815251	0.180598	0.326678	0.166556	0.220229	0.24393	0.180696	0.251218	0.399087	0.330265	0.564049	0.482641	0.26404	0.510739	0.335967	0.522949	0.539919	0.709501	0.234137	0.287632	0.247912	0.230976	0.264803	0.360692
0.411338	0.563503	0.577288	0.582736	0.598718	0.67076	0.59533	0.626734	0.553074	0.628399	0.610616	0.598512	0.589693	0.501299	0.408173	0.445875	0.419314	0.334937	0.172526	0.14122	0.17709	0.196302	0.194778	0.166952	0.0756077	0.162423	0.308904	0.152069	0.201362	0.224417	0.156199	0.226555	0.369557	0.30396	0.550353	0.459247	0.246749	0.490695	0.319221	0.496159	0.521147	0.691068	0.213054	0.262691	0.226446	0.214722	0.239725	0.334862
0.386956	0.531823	0.563726	0.5618	0.590667	0.642225	0.57083	0.631015	0.538381	0.615446	0.586226	0.581665	0.551345	0.503502	0.384624	0.426777	0.397388	0.30656	0.159995	0.1252	0.161682	0.180224	0.180126	0.150647	0.0696904	0.144749	0.291131	0.137801	0.183831	0.211043	0.13983	0.207439	0.340026	0.277654	0.536658	0.435852	0.229458	0.470652	0.302474	0.469369	0.502375	0.675581	0.199633	0.23775	0.204981	0.198469	0.214647	0.309031
0.362574	0.500142	0.535917	0.533912	0.57789	0.608665	0.535244	0.620072	0.509637	0.590778	0.54946	0.554347	0.512998	0.499737	0.361074	0.40768	0.375462	0.27854	0.147464	0.107015	0.146274	0.164145	0.163734	0.134179	0.0650448	0.127076	0.272502	0.124889	0.172973	0.200872	0.123461	0.188323	0.310495	0.251863	0.522873	0.412457	0.212167	0.450608	0.285728	0.44266	0.483603	0.660094	0.186212	0.212809	0.183516	0.182215	0.189569	0.283201
0.338174	0.466585	0.508108	0.506025	0.551875	0.575104	0.499657	0.60913	0.480892	0.561154	0.512693	0.527029	0.467943	0.47926	0.337411	0.385188	0.352736	0.25052	0.134692	0.0888293	0.132527	0.150593	0.146605	0.11771	0.0609372	0.110514	0.252161	0.115775	0.162116	0.190701	0.107685	0.169852	0.280964	0.233797	0.507739	0.389063	0.194876	0.431047	0.268614	0.417179	0.463587	0.644606	0.17279	0.199136	0.16205	0.165962	0.164491	0.25737
0.313752	0.422148	0.476344	0.470774	0.525861	0.533236	0.460506	0.592414	0.447191	0.53153	0.474609	0.496131	0.41469	0.458783	0.313086	0.362079	0.325365	0.222108	0.121197	0.0808518	0.123764	0.137777	0.129476	0.107473	0.0568296	0.100407	0.23182	0.106662	0.151252	0.178381	0.0953481	0.155121	0.254231	0.21573	0.492606	0.367119	0.181915	0.411686	0.251348	0.391699	0.443053	0.629119	0.159369	0.190157	0.140585	0.149708	0.139413	0.232129
0.28933	0.377712	0.435589	0.432578	0.491369	0.488044	0.413255	0.562576	0.402223	0.487297	0.433528	0.457097	0.361437	0.431332	0.288761	0.337812	0.297995	0.193571	0.107702	0.0769574	0.115	0.124962	0.116301	0.0997277	0.0542187	0.0903005	0.21148	0.0966203	0.140372	0.165202	0.0830108	0.140389	0.228897	0.197664	0.477472	0.345902	0.171118	0.392325	0.234081	0.366218	0.422518	0.613631	0.145948	0.181179	0.131951	0.139014	0.12892	0.207183
0.257318	0.332784	0.394835	0.394382	0.450015	0.442853	0.366004	0.532739	0.357255	0.441775	0.392448	0.418063	0.297046	0.398234	0.263891	0.309059	0.270696	0.165034	0.0942077	0.073063	0.106236	0.113478	0.103476	0.0919824	0.0517398	0.0807215	0.196234	0.0858269	0.129493	0.152022	0.0716582	0.126053	0.203563	0.179598	0.462339	0.324684	0.160321	0.372965	0.216815	0.340737	0.401983	0.598144	0.13637	0.1722	0.1279	0.130306	0.123635	0.182237
0.224221	0.28417	0.351704	0.347602	0.408661	0.393236	0.316032	0.497009	0.306483	0.395087	0.346857	0.376099	0.231063	0.365136	0.234934	0.280306	0.243938	0.143268	0.0846592	0.0656971	0.097481	0.103837	0.091552	0.087735	0.049603	0.0751023	0.181772	0.0750335	0.117939	0.140652	0.0676915	0.11468	0.178228	0.161532	0.447205	0.303466	0.149524	0.353604	0.199548	0.315256	0.381449	0.582657	0.126792	0.163222	0.123849	0.121598	0.11835	0.157291
0.191857	0.235556	0.305604	0.29828	0.359198	0.342308	0.262657	0.453913	0.248457	0.340943	0.29563	0.330473	0.167803	0.324315	0.205976	0.247201	0.21718	0.125904	0.0751108	0.0573026	0.0887255	0.0941968	0.0854033	0.0845239	0.0496562	0.0694831	0.167311	0.0705787	0.10554	0.129818	0.0637248	0.103307	0.152894	0.143465	0.432072	0.282249	0.138727	0.334243	0.182282	0.289775	0.360914	0.567172	0.117214	0.154243	0.119797	0.11289	0.113065	0.132345
0.161205	0.187335	0.259505	0.248957	0.308214	0.291381	0.209282	0.410817	0.190431	0.286798	0.244402	0.284848	0.110893	0.282046	0.176661	0.210731	0.190148	0.108541	0.0655624	0.048908	0.07997	0.0847653	0.0792545	0.0813128	0.0497094	0.0638435	0.15558	0.0673124	0.0931413	0.118984	0.0595724	0.0921761	0.12756	0.127829	0.415808	0.261031	0.12793	0.317361	0.168218	0.267805	0.343201	0.551691	0.107636	0.147318	0.115746	0.104182	0.10778	0.107399
0.130554	0.143172	0.214216	0.203237	0.256802	0.239462	0.161032	0.360118	0.140716	0.231656	0.193174	0.234201	0.0539826	0.23932	0.143646	0.174262	0.160283	0.0957799	0.0563002	0.0428271	0.0761812	0.0783666	0.0731795	0.0737871	0.0488848	0.0579925	0.147947	0.0646009	0.0849953	0.109626	0.0535014	0.0835505	0.109667	0.116242	0.397662	0.24617	0.119675	0.303268	0.157758	0.251684	0.328662	0.53621	0.0980578	0.142704	0.111449	0.0962775	0.102807	0.0973265
0.0983721	0.0990086	0.169506	0.158262	0.202558	0.187338	0.116444	0.303989	0.0969375	0.174673	0.141946	0.179968	0.0303026	0.193582	0.110632	0.137382	0.130418	0.0885423	0.0471335	0.0372249	0.0740481	0.0719679	0.0672406	0.0653688	0.0464397	0.0521415	0.140315	0.0655516	0.0798868	0.100573	0.0474305	0.0749249	0.0939004	0.104655	0.379516	0.233124	0.112147	0.289175	0.147297	0.235563	0.314122	0.520729	0.0973092	0.13809	0.105835	0.0926588	0.0994982	0.0915033
0.0656099	0.0564466	0.124797	0.113287	0.148314	0.135213	0.0718559	0.24786	0.0531588	0.11769	0.0907186	0.125734	0.019227	0.147843	0.0782489	0.100468	0.10087	0.0813048	0.0379667	0.0316226	0.0719149	0.0655692	0.0613017	0.0569505	0.0439945	0.0466101	0.132682	0.0665024	0.0747784	0.0915208	0.0415575	0.0664125	0.0781337	0.0930684	0.361369	0.220079	0.104618	0.275081	0.136836	0.219442	0.299583	0.505247	0.0965607	0.133476	0.100222	0.0890401	0.0961895	0.08568
0.0360741	0.0395021	0.0888533	0.0803809	0.10209	0.0948189	0.045972	0.189659	0.032438	0.0764116	0.0598113	0.0880439	0.00943162	0.105238	0.0559662	0.0671143	0.0764049	0.0751039	0.0326221	0.0304103	0.0695688	0.063193	0.058346	0.0550454	0.0428087	0.046192	0.123146	0.0653673	0.0706447	0.0876066	0.0388516	0.0597108	0.0623669	0.0814815	0.343223	0.207034	0.0970891	0.260988	0.126376	0.203321	0.285044	0.489766	0.0958122	0.128862	0.0946087	0.0854214	0.0928808	0.0798567
0.024821	0.0225575	0.0562812	0.0490327	0.0668933	0.0559379	0.0272822	0.13066	0.0205855	0.0470988	0.0367196	0.0567161	0.00689111	0.0669424	0.0336835	0.0428234	0.0519397	0.0712871	0.0310997	0.0297644	0.0670096	0.0624624	0.0576632	0.0539807	0.0425823	0.0457739	0.113475	0.0613643	0.0668859	0.0843554	0.0361457	0.0530092	0.0466002	0.0698947	0.325076	0.193988	0.0895603	0.246895	0.115915	0.1872	0.270504	0.474285	0.0950636	0.124248	0.0889954	0.0818027	0.0895721	0.0740334
0.0135679	0.00611127	0.023709	0.0176845	0.0316967	0.0170568	0.00859245	0.0716622	0.00873311	0.017786	0.0136279	0.0253883	0.00435061	0.0286465	0.0120562	0.0185325	0.028194	0.0674702	0.0295772	0.0291185	0.0644504	0.0617318	0.0569804	0.052916	0.0423559	0.0453681	0.103804	0.0573613	0.0631271	0.0811042	0.0335194	0.0465046	0.0308335	0.0583078	0.30693	0.180943	0.0820316	0.236117	0.107916	0.171079	0.259386	0.458804	0.0943151	0.120719	0.0833822	0.078184	0.0862634	0.0682102

## Sheet: chasse step in the FP phase
0.0636916	0.0589293	0.0377062	0.0564719	0.0585826	0.0429871	0.106644	0.0246128	0.0585686	0.0445974	0.0408764	0.0351132	0.0125412	0.0240355	0.037196	0.0343975	0.0754202	0.0401821	0.0221649	0.0802921	0.0248159	0.0568768	0.0586535	0.0423429	0.0422109	0.0728231	0.0564266	0.0309464	0.0235434	0.0305322	0.13712	0.0588897	0.166915	0.217618	0.0897561	0.156273	0.222907	0.106005	0.321631	0.116288	0.186411	0.218117	0.160472	0.120719	0.148622	0.0809789	0.0848703	0.119474
0.0727907	0.0757596	0.0509392	0.0693043	0.0729771	0.0514769	0.130905	0.0303781	0.0728362	0.0558736	0.0474735	0.0423365	0.0177974	0.0363269	0.0511852	0.0442272	0.0768264	0.0411633	0.0236672	0.0809895	0.0264236	0.0576312	0.0600551	0.0439786	0.0429444	0.0753355	0.0603723	0.0327354	0.0235434	0.0296835	0.14014	0.0651732	0.177656	0.228815	0.100279	0.157556	0.22957	0.11949	0.330889	0.127781	0.200681	0.229975	0.18393	0.124203	0.168984	0.0905056	0.0873816	0.134598
0.0818899	0.0925899	0.0641721	0.0821367	0.0873716	0.0599667	0.155166	0.0361434	0.0871037	0.0671498	0.0540705	0.0495598	0.0230535	0.0486183	0.0651743	0.0540569	0.0782326	0.0421445	0.0251695	0.0816869	0.0280313	0.0583856	0.0614567	0.0456142	0.043678	0.0778479	0.064318	0.0345245	0.0235434	0.0288348	0.143159	0.0714567	0.188397	0.240012	0.110801	0.15884	0.236233	0.132975	0.340147	0.139274	0.214951	0.241833	0.207388	0.127687	0.189346	0.100032	0.089893	0.149722
0.090989	0.10942	0.0774051	0.094969	0.101766	0.0684565	0.179427	0.0419088	0.101371	0.0784261	0.0606676	0.0567831	0.0283096	0.0609096	0.0791635	0.0638865	0.0806424	0.0431257	0.0266718	0.0823843	0.0296389	0.0591401	0.0628584	0.0472499	0.0444116	0.0803603	0.0682638	0.0363136	0.0235434	0.0279861	0.146178	0.0777402	0.199139	0.251208	0.121324	0.160123	0.242896	0.146461	0.349405	0.150767	0.229221	0.253692	0.230847	0.13117	0.209708	0.109559	0.0924043	0.164845
0.100088	0.12625	0.0913649	0.107801	0.116161	0.0769463	0.203688	0.0495394	0.115639	0.0897023	0.0672646	0.0640064	0.0335657	0.073201	0.0931527	0.0737162	0.0855157	0.0442088	0.0315859	0.086619	0.0320344	0.0607421	0.0640542	0.0521188	0.0455296	0.0834743	0.07246	0.0432238	0.0246245	0.0313958	0.149197	0.0840237	0.20988	0.262405	0.131847	0.161407	0.249559	0.159946	0.358663	0.16226	0.24349	0.26555	0.254305	0.134654	0.23007	0.119086	0.0949156	0.179969
0.115593	0.143443	0.109503	0.122848	0.133096	0.0898652	0.237568	0.0678953	0.136748	0.106512	0.081113	0.0842572	0.0483142	0.10435	0.122094	0.0981356	0.090389	0.0458778	0.0383764	0.0958647	0.0389595	0.0628104	0.0647357	0.0598169	0.046984	0.0867889	0.076794	0.0510486	0.0272373	0.0349346	0.152217	0.0903072	0.220622	0.273602	0.142369	0.162691	0.256221	0.173431	0.367921	0.173753	0.25776	0.277409	0.277763	0.138137	0.250432	0.128612	0.097427	0.195093
0.131099	0.161107	0.127642	0.140772	0.151556	0.105442	0.273852	0.0862513	0.157856	0.123321	0.0967742	0.112324	0.0687582	0.135498	0.154774	0.126203	0.0975598	0.0475467	0.0451669	0.105111	0.0458847	0.0648787	0.0654171	0.067515	0.0484385	0.0901034	0.081128	0.0588734	0.02985	0.0384733	0.155236	0.0965908	0.231363	0.284798	0.152892	0.163974	0.262884	0.186917	0.37718	0.185246	0.27203	0.289267	0.301221	0.141621	0.270794	0.139925	0.0999383	0.210217
0.146604	0.178771	0.145781	0.158696	0.170016	0.121018	0.310136	0.104607	0.178965	0.140131	0.112435	0.140392	0.0892021	0.166647	0.187454	0.154269	0.106402	0.0492157	0.0509698	0.114356	0.0528098	0.0674959	0.0660985	0.0750051	0.0498476	0.0949866	0.0861225	0.0693915	0.0324627	0.0463583	0.158255	0.102874	0.242105	0.295995	0.167251	0.167225	0.269547	0.200402	0.386438	0.202287	0.2863	0.301125	0.324679	0.147017	0.291156	0.165525	0.10245	0.22534
0.162109	0.196435	0.164418	0.176621	0.188475	0.136594	0.34642	0.127138	0.200074	0.15694	0.128097	0.168459	0.109646	0.197796	0.220133	0.182336	0.115243	0.0516045	0.0543585	0.120223	0.059964	0.0714547	0.0688186	0.0795837	0.0506221	0.101438	0.0927317	0.0810807	0.038597	0.054515	0.163941	0.110929	0.261891	0.307191	0.190049	0.174805	0.27621	0.224635	0.398523	0.221034	0.302509	0.312984	0.355215	0.156623	0.311518	0.191126	0.109458	0.240464
0.187385	0.214099	0.18424	0.194545	0.209866	0.154	0.385076	0.159582	0.229979	0.188952	0.147121	0.197216	0.134453	0.20666	0.241411	0.199975	0.135477	0.0557029	0.0577472	0.125385	0.0676621	0.0754136	0.0730677	0.0841622	0.0513966	0.10789	0.0993409	0.09277	0.0454649	0.0626717	0.176295	0.123414	0.28307	0.324503	0.212848	0.182385	0.294364	0.250522	0.411042	0.239782	0.323567	0.328416	0.386839	0.166228	0.350482	0.216726	0.117158	0.266013
0.212661	0.246643	0.204062	0.222577	0.240048	0.176895	0.425313	0.192027	0.259885	0.220964	0.168389	0.22804	0.172347	0.215525	0.255088	0.210661	0.157438	0.0598012	0.0611359	0.130547	0.0753601	0.0793724	0.0773168	0.0887408	0.0521712	0.113994	0.10595	0.105452	0.0523329	0.0754151	0.188648	0.135898	0.304248	0.344532	0.235646	0.189965	0.317626	0.276409	0.423562	0.258529	0.344626	0.345435	0.418464	0.175833	0.397715	0.242326	0.124857	0.296194
0.237938	0.281418	0.223884	0.252124	0.270229	0.19979	0.465551	0.224472	0.28979	0.252976	0.189656	0.258865	0.210242	0.22439	0.268765	0.221347	0.179149	0.0638996	0.0730736	0.137113	0.0830582	0.0858068	0.0815659	0.0972539	0.0570728	0.119055	0.112906	0.118962	0.0595458	0.0886025	0.201002	0.148382	0.325426	0.364561	0.258445	0.197546	0.340888	0.302296	0.436082	0.277276	0.365684	0.362455	0.450088	0.185438	0.444948	0.267927	0.132557	0.326376
0.263214	0.316194	0.247364	0.281672	0.300411	0.222685	0.505788	0.264959	0.319695	0.284987	0.210923	0.28969	0.248136	0.233254	0.282442	0.232033	0.199533	0.0692499	0.0856008	0.14809	0.0924686	0.0924118	0.0886268	0.10839	0.0647259	0.124117	0.119885	0.132472	0.0678431	0.10179	0.213356	0.160867	0.346605	0.38459	0.281243	0.205126	0.36415	0.328182	0.448602	0.296024	0.386742	0.379475	0.481713	0.195043	0.492181	0.301219	0.140257	0.356558
0.29046	0.350969	0.275416	0.31122	0.330593	0.24558	0.545696	0.315501	0.357276	0.322456	0.237264	0.320515	0.286031	0.281813	0.298481	0.245948	0.219917	0.0761652	0.098128	0.159067	0.104019	0.0990169	0.0961565	0.119526	0.072379	0.129178	0.126865	0.14838	0.0761405	0.11186	0.225709	0.173351	0.367783	0.404619	0.304041	0.212706	0.387411	0.354069	0.461122	0.32366	0.4078	0.396495	0.513337	0.204648	0.539413	0.361433	0.147957	0.386739
0.317707	0.387237	0.303468	0.342342	0.367968	0.276363	0.585112	0.366042	0.394856	0.359925	0.271216	0.358522	0.312316	0.330371	0.318062	0.264709	0.235452	0.0830805	0.110536	0.170044	0.11557	0.108158	0.103686	0.130598	0.0798968	0.138347	0.13407	0.167976	0.0844378	0.121515	0.238063	0.185835	0.388962	0.424648	0.335264	0.226294	0.410673	0.379956	0.473642	0.359197	0.428858	0.413515	0.544962	0.219278	0.586646	0.421646	0.155657	0.416921
0.344954	0.426917	0.331519	0.377061	0.40637	0.308273	0.624527	0.416584	0.432436	0.397393	0.305168	0.397554	0.336943	0.37893	0.337643	0.283469	0.244995	0.0899958	0.122859	0.181387	0.127121	0.119131	0.110776	0.141252	0.0865358	0.147516	0.141437	0.187572	0.0943719	0.131169	0.250416	0.19832	0.41202	0.444677	0.371541	0.243487	0.433935	0.417849	0.491669	0.394735	0.449917	0.430535	0.595715	0.236922	0.633879	0.48186	0.173978	0.447103
0.3722	0.466597	0.368332	0.411779	0.444773	0.340183	0.663943	0.465087	0.470017	0.434862	0.33912	0.436587	0.361571	0.427488	0.357224	0.30223	0.254538	0.0984889	0.135182	0.192922	0.13982	0.130104	0.115229	0.151906	0.0931748	0.156685	0.148804	0.207503	0.105168	0.143827	0.269588	0.227768	0.435762	0.464707	0.407818	0.26068	0.457197	0.460109	0.5117	0.430272	0.476142	0.447555	0.653425	0.254567	0.681112	0.542074	0.196161	0.477284
0.406572	0.506277	0.411169	0.446498	0.483175	0.372094	0.701698	0.512189	0.506475	0.472453	0.373261	0.475619	0.386198	0.466213	0.377505	0.321449	0.271168	0.108067	0.146645	0.204457	0.153309	0.14052	0.119683	0.162559	0.0998138	0.166463	0.158701	0.228484	0.115963	0.157002	0.293874	0.269938	0.459504	0.48648	0.444095	0.277873	0.483232	0.502368	0.53173	0.465809	0.506243	0.469459	0.711134	0.272212	0.71976	0.602287	0.218344	0.518761
0.440944	0.545957	0.454005	0.481217	0.521316	0.405302	0.732811	0.559291	0.542933	0.510045	0.408155	0.512652	0.41453	0.504938	0.400582	0.342506	0.29033	0.117645	0.15516	0.216137	0.166798	0.149027	0.124136	0.181109	0.105934	0.176443	0.177273	0.249464	0.127041	0.170178	0.318159	0.312109	0.483246	0.511044	0.480372	0.295065	0.513705	0.544627	0.55176	0.501347	0.536344	0.499178	0.768843	0.289856	0.744672	0.650847	0.240527	0.578311
0.475315	0.581814	0.496841	0.512847	0.559195	0.439809	0.763924	0.606393	0.579391	0.547636	0.44305	0.547686	0.446568	0.543663	0.423659	0.363562	0.309505	0.127223	0.163675	0.229781	0.180286	0.157533	0.129321	0.203607	0.111794	0.186423	0.195845	0.270605	0.141924	0.192722	0.342445	0.35428	0.506988	0.535608	0.516649	0.312258	0.544178	0.586886	0.571791	0.536856	0.566445	0.528898	0.826553	0.307501	0.769585	0.676098	0.26271	0.63786
0.509687	0.616321	0.536711	0.543387	0.597074	0.474316	0.795037	0.651249	0.615848	0.585228	0.477944	0.582719	0.478606	0.582387	0.446737	0.384619	0.329151	0.138816	0.172191	0.243425	0.196883	0.166039	0.13548	0.226105	0.117655	0.195129	0.214416	0.293349	0.156807	0.217273	0.36673	0.39645	0.53073	0.560172	0.552926	0.329451	0.574651	0.629146	0.591821	0.572297	0.596546	0.558618	0.884262	0.325146	0.794497	0.701349	0.284893	0.697409
0.545573	0.650828	0.575544	0.573928	0.634953	0.508822	0.82615	0.695318	0.646407	0.617206	0.512839	0.617752	0.510644	0.617763	0.469814	0.405675	0.348798	0.151114	0.185387	0.257069	0.214567	0.176528	0.14164	0.247842	0.123481	0.202563	0.230002	0.316093	0.17169	0.241824	0.391016	0.438621	0.554472	0.584736	0.589521	0.359943	0.605124	0.671405	0.611851	0.607739	0.626646	0.588337	0.941972	0.354402	0.81941	0.7266	0.307076	0.756958
0.58146	0.685335	0.614376	0.604468	0.672258	0.543005	0.848739	0.739386	0.676965	0.649184	0.550899	0.652331	0.54225	0.653138	0.489539	0.424541	0.368025	0.163412	0.199277	0.274645	0.232252	0.187311	0.1478	0.266532	0.129169	0.209997	0.245146	0.338838	0.189739	0.260843	0.415301	0.480791	0.58131	0.609299	0.626136	0.391322	0.635597	0.707409	0.631156	0.64318	0.656747	0.618057	0.975516	0.384432	0.844322	0.751852	0.367629	0.816507
0.617347	0.718721	0.653208	0.634116	0.705544	0.574917	0.871328	0.783455	0.707523	0.681162	0.588958	0.683727	0.570829	0.688513	0.509264	0.443406	0.386343	0.17571	0.213167	0.296437	0.249936	0.198094	0.154948	0.285223	0.134857	0.218989	0.26029	0.365794	0.211181	0.278428	0.439587	0.522962	0.610212	0.633863	0.662752	0.422701	0.66607	0.739243	0.649976	0.678622	0.686848	0.647776	0.99295	0.414462	0.869234	0.777103	0.453762	0.876057
0.653233	0.746778	0.68905	0.65953	0.73883	0.606829	0.893917	0.819052	0.738081	0.71314	0.627018	0.715123	0.599408	0.723889	0.528989	0.462272	0.40466	0.191026	0.227324	0.318228	0.270374	0.211828	0.162491	0.303913	0.140546	0.232658	0.276217	0.393022	0.232623	0.296012	0.470453	0.581638	0.639114	0.658427	0.699368	0.45408	0.696543	0.771077	0.668797	0.714063	0.717116	0.677496	1.01038	0.444492	0.894147	0.796821	0.539894	0.935606
0.686143	0.774835	0.724518	0.684944	0.772116	0.63874	0.916505	0.85359	0.767628	0.738584	0.665077	0.746518	0.627986	0.751467	0.548714	0.481137	0.423238	0.20672	0.241731	0.340019	0.291157	0.228329	0.170034	0.324859	0.150695	0.246326	0.292879	0.420251	0.254064	0.319385	0.502417	0.643064	0.668016	0.683451	0.735983	0.485459	0.727347	0.802912	0.687617	0.75008	0.747412	0.707371	1.02782	0.474523	0.918923	0.809624	0.626027	0.992478
0.719052	0.802892	0.759986	0.710358	0.805402	0.670652	0.936259	0.888128	0.797175	0.764029	0.699291	0.777914	0.656565	0.779045	0.565788	0.512605	0.441985	0.222413	0.256138	0.35996	0.31194	0.24483	0.177577	0.346626	0.162465	0.259994	0.309541	0.452304	0.275512	0.344539	0.53438	0.704491	0.696918	0.713993	0.772599	0.516838	0.762132	0.834746	0.706438	0.795315	0.777708	0.739121	1.04525	0.504553	0.942066	0.822427	0.712159	1.01723
0.751962	0.830949	0.795484	0.735771	0.834783	0.698904	0.955305	0.922529	0.826722	0.789473	0.732543	0.804468	0.678296	0.806623	0.582199	0.547222	0.460732	0.238266	0.271067	0.379688	0.332821	0.262054	0.186842	0.368392	0.174235	0.277327	0.326663	0.485656	0.29696	0.369692	0.566344	0.765918	0.72582	0.744534	0.81078	0.55336	0.796917	0.86658	0.725258	0.84055	0.808003	0.770871	1.06269	0.537359	0.965208	0.83523	0.798292	1.04197
0.784871	0.855575	0.831772	0.757495	0.862863	0.725935	0.97435	0.95337	0.856269	0.814918	0.765794	0.829409	0.697744	0.8342	0.59861	0.58184	0.484546	0.258264	0.288712	0.399416	0.35625	0.283037	0.196106	0.391918	0.186829	0.29466	0.346178	0.519008	0.318408	0.393435	0.598307	0.827344	0.754722	0.775076	0.853659	0.605314	0.831702	0.898414	0.744079	0.885784	0.838299	0.802621	1.08012	0.578492	0.988351	0.848032	0.884424	1.06672
0.812511	0.877996	0.868059	0.776847	0.890942	0.752967	0.993395	0.98421	0.881108	0.838255	0.799046	0.854349	0.717192	0.857425	0.615021	0.616458	0.508957	0.278262	0.306357	0.419349	0.379679	0.304021	0.205371	0.420285	0.201687	0.311993	0.365693	0.549446	0.340008	0.41667	0.630271	0.888771	0.783946	0.805618	0.896538	0.657268	0.866487	0.922599	0.762738	0.931019	0.868595	0.83437	1.09404	0.619626	1.01149	0.860835	0.937581	1.09147
0.84015	0.900416	0.904346	0.796199	0.919022	0.779998	1.00949	1.01505	0.905946	0.861593	0.830125	0.879289	0.73664	0.88065	0.63071	0.681112	0.532751	0.298261	0.324002	0.439739	0.403108	0.325004	0.215661	0.448653	0.216545	0.330976	0.385208	0.578219	0.361946	0.439905	0.662234	0.950197	0.813538	0.836159	0.939417	0.709221	0.901272	0.938041	0.781214	0.976254	0.89889	0.86612	1.10393	0.66076	1.03464	0.888562	0.95305	1.11622
0.86779	0.922837	0.939472	0.815551	0.945874	0.805712	1.02361	1.0456	0.930785	0.88493	0.859755	0.903434	0.755396	0.903875	0.645919	0.76579	0.553812	0.319915	0.344098	0.460129	0.426903	0.348854	0.228516	0.47702	0.231402	0.350508	0.405022	0.606992	0.383884	0.464984	0.695507	1.0059	0.843129	0.866701	0.982295	0.761175	0.936057	0.953484	0.799689	1.02149	0.928375	0.89787	1.11383	0.701893	1.05778	0.928228	0.96852	1.14097
0.895429	0.945196	0.969488	0.834844	0.970681	0.829229	1.03773	1.07484	0.955623	0.908268	0.889385	0.926253	0.772997	0.9271	0.661128	0.850469	0.574874	0.348856	0.364782	0.48052	0.452305	0.373391	0.24137	0.501856	0.252814	0.37004	0.424908	0.637327	0.405823	0.490831	0.736636	1.02724	0.872721	0.897243	1.02517	0.813129	0.970842	0.968926	0.818165	1.04502	0.952992	0.929619	1.12372	0.743027	1.08092	0.967893	0.98399	1.16572
0.920035	0.966207	0.999503	0.852821	0.995489	0.852746	1.05185	1.10408	0.976144	0.925531	0.919015	0.949072	0.790598	0.944891	0.676337	0.935148	0.595494	0.377796	0.385466	0.500026	0.477707	0.397929	0.254225	0.52581	0.275863	0.389376	0.444793	0.66932	0.432722	0.516678	0.777764	1.04858	0.902312	0.927784	1.06805	0.865082	1.00563	0.984369	0.83664	1.0639	0.977609	0.961369	1.13362	0.784161	1.10406	1.00756	0.99946	1.19046
0.944641	0.987218	1.02952	0.870798	1.0203	0.876263	1.06444	1.13332	0.996665	0.942794	0.945944	0.97189	0.8082	0.962683	0.721511	0.995772	0.615624	0.406737	0.406503	0.519196	0.503109	0.42264	0.267759	0.549763	0.298913	0.408516	0.465619	0.701314	0.46151	0.541743	0.818893	1.06992	0.931904	0.953452	1.09252	0.902124	1.03333	0.999811	0.855116	1.08278	1.00223	0.987255	1.14351	0.820326	1.12355	1.04722	1.01493	1.21013
0.969248	1.00823	1.0581	0.888775	1.0451	0.899781	1.07472	1.16017	1.01719	0.960057	0.96882	0.994709	0.825801	0.980475	0.811632	1.02031	0.635754	0.435495	0.427969	0.538366	0.529812	0.447563	0.281802	0.572814	0.320883	0.427656	0.487587	0.729998	0.490298	0.566434	0.860022	1.09126	0.961495	0.977659	1.10265	0.927569	1.05891	1.01525	0.873591	1.10166	1.02684	1.01138	1.15341	0.852627	1.14194	1.08689	1.0304	1.22828
0.993854	1.02924	1.0838	0.906752	1.06598	0.916382	1.08501	1.18225	1.03771	0.97732	0.991696	1.01304	0.839682	0.998267	0.901753	1.04486	0.657125	0.463888	0.449435	0.557563	0.559114	0.472487	0.295845	0.594061	0.340691	0.447228	0.509554	0.752061	0.518925	0.591125	0.90115	1.11259	0.987564	1.00186	1.11279	0.953013	1.08449	1.03066	0.890952	1.12054	1.05146	1.03551	1.16453	0.884928	1.16033	1.11954	1.04947	1.24643
1.01307	1.04786	1.10951	0.922826	1.08686	0.932984	1.09529	1.20432	1.05508	0.991676	1.01457	1.03137	0.853564	1.00987	0.991874	1.0694	0.67888	0.492282	0.471229	0.576925	0.588417	0.497338	0.309889	0.615307	0.3605	0.468095	0.531061	0.774125	0.546542	0.612444	0.942279	1.13393	1.00659	1.02607	1.12293	0.978457	1.11007	1.046	0.906084	1.13942	1.07608	1.05963	1.17812	0.917228	1.17872	1.14868	1.07574	1.26457
1.03228	1.06386	1.13521	0.936826	1.10774	0.949586	1.10525	1.2264	1.07245	1.00603	1.03652	1.04969	0.867445	1.02147	1.0693	1.09259	0.700772	0.520676	0.496088	0.596288	0.617719	0.521517	0.323884	0.636553	0.380308	0.488963	0.548265	0.795546	0.574159	0.631923	0.983407	1.15527	1.02561	1.05028	1.13307	1.0039	1.13565	1.06133	0.921216	1.15459	1.10069	1.08376	1.19171	0.949529	1.1971	1.17782	1.10202	1.28272
1.0515	1.07987	1.15912	0.950825	1.12862	0.966188	1.11388	1.24486	1.08982	1.02039	1.05473	1.06802	0.881326	1.03307	1.09593	1.11038	0.725139	0.55025	0.520947	0.61565	0.647659	0.545697	0.337872	0.658768	0.403029	0.50983	0.56547	0.814078	0.601776	0.651402	1.01706	1.17722	1.04464	1.07448	1.14321	1.02934	1.16124	1.07667	0.936347	1.16716	1.12106	1.10789	1.2053	0.98183	1.21549	1.20696	1.12829	1.30087
1.07072	1.09588	1.18108	0.964825	1.14712	0.978552	1.12251	1.25943	1.10719	1.03474	1.07294	1.08231	0.893982	1.04468	1.12255	1.12817	0.749506	0.581096	0.545806	0.635778	0.678284	0.569877	0.35186	0.681131	0.426198	0.532516	0.582675	0.83261	0.627513	0.668484	1.04074	1.19999	1.06366	1.09869	1.15335	1.05479	1.18682	1.092	0.951479	1.17974	1.13574	1.13201	1.21889	1.01413	1.23388	1.23609	1.15456	1.31901
1.08536	1.11189	1.20304	0.978825	1.16418	0.988373	1.13114	1.274	1.11969	1.04287	1.09116	1.09418	0.905903	1.05468	1.14918	1.14596	0.773939	0.611941	0.574034	0.656529	0.708909	0.591286	0.365609	0.703495	0.449368	0.555202	0.599323	0.850885	0.651724	0.684082	1.06443	1.22276	1.08269	1.1229	1.16544	1.07094	1.2124	1.10734	0.966611	1.19231	1.15043	1.15614	1.23248	1.03723	1.25227	1.26523	1.18084	1.33716
1.1	1.12783	1.22501	0.989903	1.18125	0.998194	1.13977	1.28856	1.1322	1.05099	1.10937	1.10604	0.917824	1.06468	1.17581	1.16375	0.798501	0.642787	0.603434	0.677279	0.739534	0.611731	0.377922	0.721523	0.470176	0.577888	0.615777	0.860959	0.675935	0.69968	1.08811	1.24552	1.10171	1.14317	1.17781	1.08577	1.22833	1.12268	0.981743	1.20488	1.16511	1.17584	1.24607	1.05901	1.26789	1.28589	1.20711	1.34927
1.11465	1.14377	1.24263	1.0007	1.19831	1.00801	1.14676	1.29905	1.1447	1.05912	1.1166	1.1179	0.929744	1.07467	1.18285	1.17639	0.823064	0.671243	0.632835	0.69803	0.766482	0.632177	0.390235	0.733049	0.487441	0.596837	0.632232	0.871032	0.700146	0.710641	1.1118	1.26829	1.11856	1.15885	1.19018	1.1006	1.23301	1.13762	0.995424	1.21746	1.1798	1.1904	1.25849	1.08079	1.28029	1.30413	1.23174	1.35435
1.12929	1.15971	1.2577	1.0115	1.21427	1.01695	1.15374	1.30715	1.15721	1.06724	1.12382	1.12944	0.940701	1.08467	1.18989	1.18904	0.846914	0.698293	0.660629	0.711434	0.791267	0.650413	0.402548	0.744575	0.504707	0.614541	0.648119	0.881106	0.725916	0.718356	1.13548	1.29105	1.12671	1.17452	1.20255	1.11543	1.23768	1.15098	1.00331	1.22814	1.19448	1.20495	1.26623	1.10257	1.29269	1.32237	1.24979	1.35943
1.13963	1.17565	1.27276	1.0223	1.22693	1.02324	1.16073	1.31524	1.16228	1.07325	1.13105	1.13999	0.948768	1.08871	1.19693	1.20168	0.870349	0.725343	0.685881	0.724576	0.816052	0.665152	0.417853	0.7561	0.521972	0.632245	0.663108	0.882503	0.751742	0.726072	1.15917	1.31382	1.13486	1.1902	1.21492	1.13026	1.24236	1.16435	1.01119	1.23535	1.20917	1.2195	1.27396	1.12436	1.30509	1.34061	1.26785	1.36451
1.14998	1.19022	1.28783	1.03263	1.23958	1.02953	1.16772	1.32333	1.16734	1.07925	1.13827	1.15054	0.956834	1.09274	1.20396	1.21432	0.893784	0.752392	0.711133	0.737717	0.840837	0.67989	0.437146	0.764858	0.540206	0.647252	0.678097	0.882703	0.777568	0.730183	1.18285	1.33658	1.143	1.20588	1.2273	1.14509	1.24703	1.17771	1.01907	1.24257	1.22386	1.23405	1.2817	1.14614	1.3175	1.35885	1.2859	1.36959
1.16033	1.20222	1.30172	1.04206	1.25223	1.03582	1.17294	1.32776	1.17241	1.08525	1.1415	1.16109	0.964901	1.09677	1.20737	1.22205	0.915245	0.775236	0.736663	0.749307	0.858798	0.694707	0.45644	0.773419	0.55851	0.659564	0.692805	0.882903	0.800713	0.731448	1.19705	1.3503	1.15115	1.22156	1.23842	1.15794	1.25171	1.19108	1.02695	1.24978	1.23065	1.2486	1.28944	1.16657	1.3299	1.37709	1.30395	1.37467
1.17067	1.21423	1.31527	1.0515	1.26489	1.0421	1.17773	1.33113	1.17748	1.09126	1.14373	1.17164	0.972967	1.1008	1.20988	1.22855	0.936538	0.796879	0.770539	0.758356	0.87481	0.711862	0.475734	0.781979	0.576813	0.671875	0.699056	0.880756	0.819472	0.732714	1.20746	1.36039	1.1593	1.23724	1.24416	1.16219	1.25639	1.20444	1.03483	1.257	1.23428	1.26316	1.29718	1.18113	1.3423	1.38646	1.322	1.37975
1.17777	1.22623	1.32882	1.06093	1.27452	1.04533	1.18251	1.33451	1.17973	1.09268	1.14596	1.17578	0.97705	1.10314	1.21238	1.23505	0.957581	0.818521	0.804416	0.767406	0.890821	0.729018	0.491135	0.788168	0.590943	0.684323	0.705307	0.87773	0.83823	0.728417	1.21786	1.37049	1.16744	1.25292	1.24989	1.16645	1.26106	1.2178	1.04271	1.26421	1.23791	1.27771	1.30491	1.1957	1.3547	1.39472	1.34006	1.38483
1.18486	1.23823	1.34236	1.07036	1.28372	1.04812	1.1873	1.33789	1.18198	1.09409	1.14819	1.17901	0.980564	1.10547	1.21488	1.24155	0.97769	0.840164	0.838292	0.776455	0.906833	0.746173	0.50498	0.791646	0.600305	0.697182	0.711559	0.874703	0.856989	0.719177	1.22827	1.38058	1.17444	1.26588	1.25562	1.1707	1.26359	1.23094	1.0498	1.27012	1.24154	1.29052	1.31224	1.21026	1.36521	1.40299	1.35728	1.38731
1.19196	1.24551	1.34992	1.07671	1.29292	1.05091	1.19141	1.33967	1.18423	1.09551	1.1484	1.18224	0.984078	1.1078	1.2145	1.24536	0.997799	0.857831	0.851647	0.78284	0.917815	0.758636	0.518825	0.795125	0.609666	0.71004	0.715091	0.861931	0.87424	0.709936	1.23867	1.39068	1.16542	1.26391	1.26135	1.17496	1.25427	1.24085	1.04573	1.26617	1.24517	1.29376	1.31379	1.22483	1.36535	1.41125	1.36286	1.37547
1.19905	1.25148	1.35699	1.08221	1.30212	1.05369	1.19508	1.34133	1.18648	1.09693	1.14727	1.18547	0.987592	1.11013	1.21221	1.24739	1.011	0.87518	0.85523	0.78853	0.928394	0.768866	0.532669	0.798603	0.619028	0.722899	0.717329	0.841977	0.891097	0.696737	1.24908	1.40077	1.15639	1.26195	1.26708	1.17921	1.24496	1.25076	1.04166	1.26222	1.2488	1.29699	1.31534	1.23939	1.3655	1.41952	1.36844	1.36363
1.2023	1.25745	1.36406	1.0877	1.30854	1.05404	1.19874	1.34298	1.18519	1.09468	1.14614	1.18519	0.9902	1.11057	1.20991	1.24942	1.0173	0.892529	0.858813	0.794221	0.938974	0.779095	0.544996	0.792029	0.625768	0.726989	0.719567	0.822023	0.907955	0.679579	1.25948	1.41087	1.14736	1.25998	1.27282	1.18347	1.23564	1.26067	1.03759	1.25828	1.25243	1.30023	1.31689	1.25395	1.36564	1.42778	1.37403	1.35179
1.20555	1.26342	1.37073	1.0932	1.3122	1.05193	1.2024	1.34431	1.1839	1.09242	1.145	1.1814	0.991903	1.11101	1.20761	1.25145	1.02359	0.909132	0.861465	0.798647	0.948789	0.786556	0.557323	0.785454	0.632508	0.731078	0.717374	0.801332	0.923769	0.662421	1.26989	1.42096	1.13833	1.25801	1.2754	1.18107	1.22633	1.27059	1.03352	1.25433	1.25606	1.30347	1.31843	1.26341	1.36579	1.42643	1.37961	1.33995
1.2088	1.26851	1.37229	1.09722	1.31585	1.04983	1.20573	1.34153	1.1826	1.09017	1.14051	1.17762	0.993606	1.11144	1.20361	1.25172	1.03358	0.916405	0.862163	0.798228	0.949054	0.788205	0.56965	0.778879	0.639248	0.735168	0.705877	0.77964	0.935584	0.64485	1.26925	1.41754	1.12931	1.25605	1.27484	1.17201	1.21702	1.2805	1.02945	1.25038	1.24376	1.3067	1.31998	1.26776	1.36593	1.42509	1.38519	1.32811
1.21205	1.27046	1.37384	1.09593	1.31951	1.04772	1.20856	1.33876	1.18131	1.08792	1.13098	1.17383	0.995309	1.11188	1.19703	1.24935	1.04456	0.923679	0.86286	0.79781	0.949319	0.789854	0.579721	0.772575	0.641327	0.737805	0.694381	0.757949	0.947399	0.626814	1.26861	1.41412	1.12028	1.25408	1.27428	1.16296	1.2077	1.29041	1.02538	1.24644	1.23146	1.30994	1.32153	1.27211	1.36607	1.42374	1.39077	1.31627
1.20857	1.2724	1.3754	1.09464	1.32229	1.04501	1.21139	1.33599	1.17553	1.08404	1.12144	1.16899	0.996321	1.10665	1.19046	1.24698	1.05508	0.930952	0.863557	0.797392	0.949584	0.791503	0.584152	0.766509	0.639328	0.739958	0.682884	0.734264	0.959214	0.608778	1.26797	1.4107	1.11125	1.25211	1.27372	1.1539	1.19839	1.30032	1.02131	1.23372	1.21917	1.31318	1.32308	1.27646	1.36622	1.4224	1.39636	1.30443
1.2051	1.27435	1.37546	1.09335	1.31897	1.03801	1.21421	1.33243	1.16975	1.08016	1.11191	1.15676	0.992497	1.10142	1.18389	1.24461	1.06016	0.937085	0.86228	0.793492	0.948866	0.789141	0.588583	0.760443	0.63733	0.742111	0.672974	0.705267	0.964322	0.588213	1.26733	1.40728	1.08387	1.25015	1.27316	1.14485	1.18907	1.29793	1.00405	1.21983	1.20687	1.31642	1.31021	1.28081	1.36636	1.42105	1.3825	1.29259
1.20163	1.27629	1.37025	1.09206	1.31564	1.03102	1.21528	1.32613	1.16396	1.07628	1.10201	1.14453	0.988672	1.09619	1.17656	1.24104	1.06525	0.939229	0.860937	0.787466	0.944708	0.786645	0.593013	0.754024	0.634975	0.74056	0.663117	0.676269	0.965332	0.564443	1.26669	1.40386	1.05519	1.23909	1.2726	1.13579	1.16263	1.29465	0.985855	1.20594	1.19457	1.30643	1.29631	1.28517	1.34515	1.41805	1.36725	1.2714
1.19816	1.27321	1.36504	1.08617	1.31232	1.02402	1.20934	1.31983	1.15818	1.0724	1.09065	1.13231	0.984848	1.09096	1.16619	1.2327	1.06852	0.941374	0.859594	0.781439	0.94055	0.784149	0.595113	0.742663	0.627641	0.735306	0.653259	0.646261	0.966342	0.540673	1.26605	1.40044	1.0265	1.22637	1.27204	1.12673	1.13308	1.29138	0.967657	1.19205	1.18227	1.29405	1.28241	1.28952	1.32007	1.40179	1.352	1.24851
1.19048	1.26744	1.35983	1.07781	1.309	1.01703	1.2034	1.31353	1.14843	1.06292	1.07929	1.12008	0.981023	1.08233	1.15582	1.22436	1.0687	0.943518	0.852614	0.775249	0.936392	0.78075	0.595465	0.731302	0.620306	0.730051	0.637045	0.608929	0.966965	0.515861	1.26541	1.39702	0.99781	1.21366	1.26201	1.1084	1.10353	1.28811	0.949458	1.17816	1.16997	1.28166	1.2685	1.28447	1.29498	1.38554	1.33675	1.22563
1.18279	1.26167	1.3539	1.06946	1.30148	1.00836	1.19746	1.30434	1.13867	1.05344	1.06793	1.10647	0.970762	1.07369	1.14545	1.21602	1.06889	0.943079	0.842075	0.764468	0.92672	0.776779	0.595816	0.719941	0.612972	0.723237	0.616815	0.571597	0.956746	0.489559	1.26201	1.38714	0.969123	1.20094	1.24979	1.08792	1.07397	1.28484	0.93126	1.16427	1.15128	1.26927	1.2546	1.27725	1.26989	1.36929	1.32151	1.20274
1.17511	1.2559	1.34673	1.06111	1.29256	0.999139	1.19152	1.29022	1.12892	1.04397	1.05657	1.09241	0.958356	1.06505	1.13509	1.20768	1.06429	0.938248	0.831535	0.753687	0.907677	0.772808	0.596168	0.704179	0.599804	0.711745	0.596586	0.534265	0.946528	0.463258	1.25172	1.36111	0.940435	1.18823	1.23757	1.06744	1.04442	1.28156	0.913061	1.1397	1.11659	1.25688	1.2407	1.27004	1.2448	1.35303	1.30626	1.17985
1.16743	1.24964	1.33957	1.05205	1.28365	0.989914	1.18115	1.2761	1.11916	1.03449	1.04093	1.07834	0.94595	1.05641	1.11655	1.19323	1.0572	0.933417	0.823548	0.742907	0.888633	0.765506	0.593737	0.685484	0.582748	0.700252	0.575356	0.490615	0.93631	0.435082	1.24143	1.33507	0.911748	1.17552	1.22536	1.04696	1.01486	1.27829	0.894862	1.1093	1.08191	1.2445	1.2268	1.26282	1.21971	1.33678	1.29101	1.15697
1.14899	1.23813	1.3324	1.03555	1.27473	0.980689	1.17079	1.26199	1.10247	1.01834	1.0253	1.06427	0.933544	1.04135	1.09802	1.17878	1.05011	0.928586	0.822899	0.731384	0.869589	0.748625	0.590841	0.666789	0.565692	0.68876	0.551252	0.446767	0.923516	0.403877	1.23114	1.30904	0.875546	1.1628	1.21314	1.02648	0.985311	1.2611	0.865042	1.07891	1.04722	1.23211	1.19755	1.2556	1.19463	1.31246	1.25781	1.13408
1.13056	1.22662	1.32107	1.01905	1.26242	0.967803	1.16042	1.24323	1.08577	1.00219	1.00966	1.04629	0.920363	1.02628	1.07949	1.16433	1.03417	0.917442	0.82225	0.718947	0.850435	0.731745	0.587946	0.646904	0.548659	0.670465	0.527147	0.40292	0.907553	0.372672	1.22085	1.283	0.837465	1.15009	1.20092	1.006	0.955757	1.24042	0.832316	1.04851	1.01253	1.21972	1.16445	1.24839	1.16954	1.2599	1.22012	1.11119
1.11212	1.21511	1.30587	1.00255	1.24447	0.948818	1.15006	1.22017	1.06908	0.98604	0.994025	1.02176	0.905892	1.01122	1.06095	1.14987	1.01774	0.900434	0.821601	0.706509	0.831178	0.714865	0.583896	0.619287	0.531774	0.65217	0.503043	0.365944	0.89159	0.342668	1.21056	1.25696	0.799385	1.12725	1.18693	0.983085	0.923168	1.21975	0.799591	1.01812	0.977848	1.19906	1.13136	1.23933	1.13918	1.20735	1.18243	1.07908
1.09368	1.2036	1.29067	0.98605	1.22652	0.929832	1.13482	1.19711	1.05238	0.969891	0.9724	0.997238	0.891421	0.996149	1.03768	1.12814	1	0.883427	0.815349	0.694072	0.811921	0.699075	0.572916	0.59167	0.51489	0.633875	0.475454	0.330494	0.875627	0.314864	1.20027	1.23093	0.761305	1.09573	1.16047	0.943135	0.887978	1.19908	0.766865	0.987725	0.943161	1.1713	1.09827	1.21738	1.1043	1.1548	1.14473	1.03904
1.06821	1.18552	1.27547	0.963962	1.20857	0.910846	1.11837	1.17404	1.03076	0.94696	0.949279	0.972714	0.876951	0.97347	1.01321	1.10458	0.978083	0.866419	0.808497	0.669871	0.792664	0.683402	0.561937	0.564054	0.498005	0.614521	0.447493	0.295044	0.854152	0.28706	1.18998	1.20489	0.723225	1.06421	1.13402	0.903185	0.852788	1.1784	0.734139	0.948433	0.908475	1.14354	1.06518	1.19543	1.06942	1.10225	1.10704	0.999009
1.04274	1.1614	1.25345	0.93675	1.19061	0.89186	1.10192	1.15029	1.00915	0.92403	0.926157	0.94819	0.86248	0.950791	0.988752	1.08103	0.956162	0.848979	0.801644	0.643787	0.769401	0.667728	0.550958	0.534543	0.475398	0.594813	0.419531	0.259997	0.831794	0.258092	1.17288	1.16462	0.685144	1.03269	1.10757	0.863235	0.817597	1.15773	0.701414	0.896428	0.870259	1.11578	1.03209	1.17347	1.03454	1.0497	1.06935	0.958977
1.01727	1.13728	1.22803	0.909538	1.16374	0.869472	1.08547	1.12618	0.98753	0.901099	0.903035	0.919335	0.840508	0.928112	0.964289	1.05747	0.939435	0.831322	0.792088	0.617704	0.744135	0.647826	0.538161	0.504086	0.449929	0.575106	0.391454	0.225151	0.809437	0.226691	1.15068	1.11366	0.647064	1.00117	1.08112	0.823285	0.782407	1.13705	0.668688	0.844424	0.829396	1.08802	0.999001	1.15152	0.999655	0.999333	1.03166	0.918944
0.991802	1.11317	1.20261	0.882327	1.13687	0.847083	1.06497	1.10208	0.965914	0.878169	0.876411	0.89048	0.818537	0.905433	0.932646	1.0292	0.927382	0.813664	0.780305	0.591977	0.71887	0.624442	0.52294	0.473629	0.424461	0.552866	0.363284	0.190304	0.786065	0.195289	1.12847	1.0627	0.608939	0.969648	1.05467	0.783335	0.747217	1.10738	0.635824	0.79242	0.788533	1.06025	0.960679	1.12957	0.964775	0.953351	0.993194	0.878911
0.959514	1.08905	1.17719	0.855115	1.11	0.824694	1.04177	1.07798	0.935942	0.846582	0.847451	0.861625	0.796565	0.878213	0.896217	0.997784	0.915329	0.796007	0.768522	0.567189	0.693604	0.601057	0.507719	0.44272	0.399174	0.528093	0.335113	0.159706	0.76003	0.167651	1.10626	1.01174	0.570793	0.938128	1.02821	0.743385	0.712026	1.0732	0.602891	0.740416	0.74767	1.03249	0.919739	1.10762	0.929894	0.907368	0.954344	0.838878
0.927226	1.05289	1.14398	0.824646	1.08312	0.802305	1.01857	1.04901	0.90597	0.814994	0.818491	0.832771	0.774594	0.850992	0.859787	0.966368	0.890884	0.774596	0.75488	0.5424	0.668133	0.57697	0.492498	0.41	0.374615	0.50332	0.307635	0.133107	0.733995	0.149046	1.08406	0.960787	0.532646	0.906609	0.993784	0.700723	0.676836	1.03902	0.569959	0.688412	0.706808	1.00473	0.8788	1.07856	0.895013	0.861385	0.915493	0.798845
0.894938	1.01618	1.10901	0.79403	1.04907	0.775991	0.995375	1.01893	0.875998	0.783407	0.789531	0.800284	0.74957	0.823771	0.823358	0.934952	0.863641	0.752332	0.733495	0.517611	0.642614	0.549953	0.474853	0.37728	0.350056	0.477427	0.283043	0.106507	0.70796	0.130441	1.06185	0.909829	0.4945	0.873679	0.949096	0.654575	0.6417	1.00484	0.537026	0.637474	0.665945	0.974607	0.837861	1.04037	0.857523	0.815403	0.876643	0.757966
0.86265	0.979475	1.07403	0.763413	1.01071	0.747321	0.968253	0.988852	0.846026	0.75182	0.757765	0.765617	0.722714	0.79655	0.786329	0.900491	0.836233	0.730068	0.71211	0.488308	0.617096	0.522935	0.456238	0.34456	0.325497	0.448173	0.258451	0.0831995	0.672042	0.111661	1.03964	0.858872	0.456353	0.836051	0.904409	0.608427	0.606747	0.970662	0.504093	0.591517	0.625082	0.936594	0.796922	1.00217	0.811332	0.76942	0.837793	0.714263
0.824691	0.942768	1.03905	0.732796	0.972355	0.718651	0.935246	0.958774	0.808669	0.719395	0.721788	0.730951	0.695858	0.75881	0.748401	0.861463	0.807427	0.707803	0.690724	0.456973	0.591577	0.495918	0.437623	0.320696	0.301008	0.418919	0.233858	0.0656536	0.631677	0.0923963	1.01744	0.807914	0.418207	0.798423	0.859722	0.562279	0.571793	0.936483	0.47116	0.54556	0.584219	0.898582	0.755983	0.963978	0.76514	0.723803	0.798943	0.670561
0.786733	0.906023	0.991679	0.701002	0.933997	0.689982	0.90224	0.918527	0.771311	0.68697	0.685812	0.696285	0.669003	0.72107	0.710473	0.822435	0.77862	0.679165	0.663123	0.425638	0.56131	0.462875	0.419008	0.300053	0.276546	0.389666	0.211342	0.0481077	0.591312	0.0731313	0.977039	0.757416	0.38006	0.760795	0.815035	0.51613	0.536839	0.902304	0.438227	0.499603	0.543338	0.860569	0.715044	0.925784	0.718949	0.678642	0.760093	0.626859
0.748774	0.869219	0.943835	0.667376	0.894786	0.66069	0.869234	0.87789	0.733954	0.654545	0.649835	0.661562	0.641351	0.68333	0.672545	0.783406	0.747002	0.650281	0.634326	0.39481	0.53086	0.428672	0.393089	0.27941	0.252083	0.360422	0.189225	0.032663	0.551217	0.0554416	0.933608	0.706994	0.343546	0.723167	0.770347	0.469982	0.501886	0.859209	0.404559	0.453646	0.502453	0.822556	0.673088	0.88759	0.672758	0.633481	0.716454	0.583157
0.710815	0.832414	0.895992	0.633751	0.853018	0.629535	0.834886	0.837252	0.696596	0.62212	0.614092	0.62667	0.61131	0.64559	0.634142	0.744174	0.711074	0.621397	0.605529	0.368376	0.50041	0.39447	0.367171	0.257863	0.22892	0.331178	0.167108	0.0250223	0.513468	0.0428711	0.890177	0.656572	0.308459	0.685538	0.72566	0.423834	0.466932	0.808313	0.370246	0.407689	0.461569	0.784543	0.630242	0.849396	0.626567	0.58832	0.668624	0.539455
0.674406	0.79561	0.8483	0.600125	0.81125	0.598379	0.795172	0.795851	0.657222	0.588321	0.579281	0.591779	0.58127	0.61012	0.593838	0.704126	0.675145	0.591733	0.576118	0.341942	0.470236	0.362967	0.341252	0.233832	0.209331	0.301935	0.145407	0.0173817	0.47572	0.0303006	0.846747	0.60615	0.273372	0.64791	0.678679	0.383673	0.431979	0.757417	0.335934	0.361731	0.420685	0.74653	0.587397	0.800688	0.580375	0.543159	0.620795	0.495752
0.637998	0.758805	0.801828	0.566499	0.769482	0.567224	0.755457	0.748347	0.617848	0.554522	0.54447	0.556887	0.551229	0.574651	0.553533	0.664077	0.639031	0.555831	0.546051	0.315508	0.442271	0.334344	0.316785	0.2098	0.189743	0.275145	0.124152	0.0102041	0.437971	0.0197164	0.803316	0.555728	0.238286	0.610282	0.630934	0.345507	0.397025	0.70652	0.301621	0.318327	0.379801	0.708517	0.544551	0.748474	0.534184	0.497998	0.572965	0.45205
0.601589	0.718275	0.755355	0.536435	0.727715	0.536068	0.715742	0.700843	0.578474	0.520723	0.50966	0.521995	0.521189	0.539181	0.513229	0.624029	0.60283	0.519929	0.515983	0.288512	0.414306	0.305722	0.295948	0.185769	0.170154	0.249172	0.102897	0.0102041	0.402563	0.0167939	0.759886	0.505306	0.203199	0.572654	0.583189	0.307342	0.362071	0.655624	0.267309	0.275082	0.338916	0.670504	0.501705	0.69626	0.487993	0.456866	0.525135	0.408348
0.56518	0.676961	0.708883	0.507119	0.682915	0.507902	0.676027	0.653339	0.5391	0.486923	0.474849	0.492237	0.489593	0.503711	0.472924	0.583981	0.566629	0.484027	0.48548	0.260991	0.386341	0.277865	0.27511	0.167656	0.151922	0.2232	0.0826492	0.0102041	0.369339	0.0138714	0.716455	0.454884	0.168112	0.538765	0.535444	0.269176	0.329782	0.604727	0.232996	0.231838	0.298032	0.628579	0.458859	0.644047	0.452972	0.418957	0.477306	0.372105
0.52911	0.635647	0.660827	0.477804	0.637683	0.480163	0.631138	0.605177	0.501558	0.455864	0.447193	0.463211	0.457774	0.473762	0.441278	0.549235	0.525492	0.448086	0.452028	0.23347	0.358285	0.255175	0.254273	0.151024	0.134029	0.199569	0.0692065	0.0102041	0.336115	0.0113912	0.672736	0.405833	0.133025	0.505187	0.487698	0.231011	0.297715	0.553831	0.198683	0.188593	0.259026	0.586327	0.416014	0.591833	0.418881	0.381049	0.429476	0.336483
0.49304	0.594333	0.608245	0.448489	0.59245	0.452424	0.586249	0.555138	0.464016	0.424804	0.419536	0.434186	0.425956	0.443813	0.409631	0.514488	0.484221	0.412033	0.418576	0.20595	0.329971	0.232485	0.232824	0.134392	0.116136	0.178279	0.0557638	0.0102041	0.302892	0.0109751	0.627289	0.365002	0.106766	0.47161	0.439953	0.192845	0.265648	0.508133	0.170476	0.145348	0.231285	0.544075	0.377156	0.53962	0.384791	0.34314	0.386815	0.300862
0.45697	0.555297	0.555662	0.417945	0.547218	0.424684	0.54136	0.505098	0.426474	0.393745	0.391879	0.405161	0.394138	0.413863	0.377984	0.479742	0.443609	0.375979	0.385125	0.183913	0.301656	0.209795	0.210918	0.11769	0.0991339	0.156988	0.0423212	0.0102041	0.272982	0.010559	0.581842	0.324172	0.093747	0.438032	0.392956	0.15588	0.233581	0.470235	0.151426	0.102103	0.203545	0.501823	0.344279	0.488094	0.350701	0.305232	0.351905	0.26524
0.4209	0.522713	0.50308	0.383921	0.506949	0.395744	0.496472	0.455058	0.388932	0.362685	0.364223	0.373987	0.364736	0.383914	0.346338	0.444995	0.404841	0.339926	0.354239	0.162283	0.273342	0.186819	0.189011	0.100852	0.0839126	0.136175	0.0325746	0.0102041	0.243317	0.0102041	0.536395	0.283341	0.0807282	0.404455	0.357188	0.136927	0.201513	0.432336	0.132377	0.0814915	0.175805	0.459571	0.311403	0.446888	0.31661	0.267323	0.316996	0.229619
0.382045	0.49013	0.455604	0.349896	0.471643	0.365602	0.458429	0.408958	0.355634	0.327048	0.331754	0.340663	0.337749	0.346824	0.311568	0.40725	0.366073	0.305251	0.324102	0.140652	0.246881	0.16376	0.167105	0.0840136	0.0686914	0.116795	0.023906	0.0102041	0.213653	0.0102041	0.490948	0.242511	0.0677094	0.370877	0.321419	0.117974	0.169446	0.394437	0.113327	0.07031	0.148064	0.41732	0.278527	0.405683	0.28252	0.230636	0.282087	0.193997
0.343189	0.457547	0.415553	0.315871	0.436337	0.33546	0.422098	0.368588	0.322335	0.29141	0.298082	0.307339	0.310762	0.309734	0.276018	0.368756	0.324596	0.27258	0.293965	0.121033	0.223117	0.1407	0.151805	0.0671751	0.0534701	0.0974153	0.0152374	0.0102041	0.186032	0.0102041	0.445501	0.201681	0.0546906	0.3373	0.28565	0.0990205	0.137379	0.356539	0.0942775	0.0591285	0.120324	0.375068	0.24565	0.364477	0.24843	0.194559	0.247178	0.158376
0.304334	0.424964	0.375502	0.281847	0.401031	0.305319	0.385767	0.328218	0.289037	0.255773	0.264411	0.274015	0.283776	0.272644	0.240468	0.330262	0.280927	0.239909	0.263822	0.105234	0.199352	0.118772	0.137605	0.0534644	0.0411315	0.0780352	0.0102041	0.0102041	0.162292	0.0102041	0.400054	0.16085	0.0416718	0.303722	0.249881	0.0800672	0.105312	0.31864	0.0752279	0.047947	0.0925837	0.332816	0.212774	0.323272	0.21434	0.158482	0.212268	0.122755
0.265478	0.38797	0.335451	0.249218	0.364949	0.275384	0.349436	0.287847	0.255738	0.220136	0.230739	0.241538	0.256776	0.235554	0.204918	0.291768	0.237257	0.207238	0.23367	0.0894345	0.175588	0.0984091	0.123406	0.0402349	0.0292363	0.0665094	0.0102041	0.0102041	0.138553	0.0102041	0.354607	0.12002	0.028653	0.273845	0.214112	0.0611139	0.0872757	0.280741	0.0561783	0.0367656	0.0648433	0.298023	0.179898	0.282066	0.188385	0.122405	0.177359	0.102433
0.227945	0.349047	0.292712	0.2172	0.323436	0.2469	0.312259	0.248802	0.224028	0.192698	0.200819	0.21499	0.229687	0.206683	0.175187	0.255966	0.201669	0.17849	0.203517	0.0736355	0.153675	0.0780465	0.109204	0.0270053	0.0173412	0.0549835	0.0102041	0.0102041	0.114814	0.0102041	0.314132	0.0919737	0.0189871	0.24628	0.178343	0.0421606	0.0780091	0.244819	0.0412751	0.0255841	0.0475008	0.267892	0.15057	0.240861	0.167515	0.0863284	0.146919	0.0916727
0.190412	0.310124	0.247824	0.185182	0.281924	0.218416	0.274518	0.210817	0.192318	0.165261	0.1734	0.188443	0.202598	0.177813	0.149336	0.22196	0.167595	0.15288	0.174013	0.0582516	0.133243	0.0580593	0.094988	0.0180449	0.00962231	0.0434577	0.0101071	0.0102041	0.0947284	0.0100572	0.280286	0.0809735	0.0185417	0.218715	0.148626	0.0296826	0.0687426	0.214335	0.0377745	0.0194278	0.0440219	0.237761	0.131	0.204756	0.146644	0.0502516	0.128768	0.0809128
0.152878	0.2712	0.202936	0.153163	0.240411	0.189932	0.236777	0.172832	0.160607	0.137823	0.145981	0.161895	0.175509	0.148943	0.123486	0.187954	0.134991	0.127271	0.153915	0.0429999	0.112811	0.043515	0.0807723	0.0154881	0.00816788	0.03474	0.00860421	0.00947687	0.0758056	0.00839287	0.246441	0.0699734	0.0180963	0.19115	0.128996	0.027997	0.059476	0.18385	0.034274	0.0189249	0.0405431	0.20763	0.11143	0.177152	0.125774	0.0379493	0.110618	0.070153
0.115345	0.23304	0.158047	0.122573	0.198898	0.161447	0.199036	0.134847	0.128897	0.110386	0.118562	0.135348	0.14842	0.120073	0.0976351	0.153947	0.11208	0.101662	0.133817	0.0277482	0.0923785	0.0289708	0.0665566	0.0129313	0.00671345	0.0269585	0.0071013	0.007877	0.0568828	0.00672852	0.212595	0.0589733	0.0176509	0.163585	0.109366	0.0263113	0.0502095	0.153365	0.0307734	0.0184221	0.0370643	0.177499	0.0918595	0.149549	0.104904	0.0324396	0.092467	0.0593931
0.0894601	0.199969	0.123835	0.101501	0.167683	0.138631	0.165569	0.106158	0.106817	0.0899455	0.0952634	0.112753	0.126177	0.0976062	0.0750148	0.124221	0.0891702	0.0817688	0.113718	0.0146412	0.0756463	0.0144266	0.0531501	0.0103745	0.00525903	0.0191769	0.00559839	0.00627713	0.039483	0.00516206	0.178749	0.0479731	0.0172055	0.13602	0.0897359	0.0246256	0.0409429	0.12288	0.0272729	0.0179192	0.0335854	0.147367	0.0722893	0.121945	0.0840339	0.02693	0.0743164	0.0486333
0.0635749	0.166899	0.0941178	0.0804291	0.1399	0.117705	0.138516	0.0813827	0.0847365	0.0695052	0.0781451	0.0914761	0.105549	0.0751398	0.0572402	0.100915	0.0686419	0.0642829	0.0967158	0.0118293	0.0604719	0.0091375	0.0408225	0.00884662	0.00516206	0.0145043	0.00516206	0.00516206	0.0293943	0.00516206	0.144904	0.036973	0.0167601	0.108456	0.0701058	0.02294	0.0316763	0.0923947	0.0237723	0.0174163	0.0301066	0.117236	0.0527191	0.0943417	0.0631638	0.0214204	0.0561658	0.0378734
0.0376898	0.133828	0.0644006	0.0593572	0.112117	0.0967787	0.111463	0.0566075	0.0626562	0.0490649	0.0610268	0.0701989	0.0849211	0.0526733	0.0394656	0.0776091	0.0513889	0.046797	0.08098	0.00901745	0.0452976	0.00763459	0.0284949	0.00739219	0.00516206	0.0129406	0.00516206	0.00516206	0.0193055	0.00516206	0.111058	0.0259728	0.0163147	0.0808907	0.0504757	0.0212543	0.0224098	0.0619097	0.0202718	0.0169134	0.0266278	0.0871052	0.033149	0.0667381	0.0422936	0.0159108	0.0380152	0.0271136
0.0118046	0.100757	0.0346835	0.0382853	0.0843338	0.0758523	0.0844091	0.0318323	0.0405759	0.0286245	0.0439085	0.0489217	0.0642931	0.0302069	0.021691	0.0543032	0.0341359	0.0293112	0.0652442	0.00620556	0.0301232	0.00613168	0.0161672	0.00593776	0.00516206	0.0113769	0.00516206	0.00516206	0.00921669	0.00516206	0.0772125	0.0149727	0.0159287	0.0618073	0.0308456	0.0195686	0.0159945	0.0354895	0.017238	0.0165289	0.0231489	0.0662452	0.0161882	0.0391346	0.027845	0.0104012	0.0222847	0.0196645

## Sheet: cross-step in the BP phase
0.776929	0.788545	0.0216662	0.00649986	0.0113741	0.209103	0.00974979	0.272924	0.341697	0.0804375	0.710948	0.0527775	0.292477	0.234224	0.0139856	0.0985834	0.00630252	0.0484694	0.121633	0.00504202	0.0973389	0.106329	0.0935414	0.00630252	0.0127251	0.00504202	0.0523409	0.165152	0.0915726	0.0572089	0.00504202	0.191553	0.0235299	0.0312003	0.00968523	0.0115012	0.00726392	0.078817	0.0205258	0.0206157	0.0731097	0.0207541	0.0151332	0.0212902	0.0367174	0.0199291	1.28951	0.0491474
0.848899	0.892498	0.32689	0.0426758	0.294514	0.496305	0.359768	0.482157	0.620987	0.369165	0.843609	0.378984	0.558985	0.526114	0.166979	0.552243	0.188372	0.497034	0.589498	0.0413929	0.508475	0.523041	0.525443	0.113129	0.0837631	0.127028	0.560497	0.480315	0.422649	0.485332	0.0949464	0.614262	0.144628	0.229906	0.0243942	0.0172705	0.0566431	0.0804479	0.0340275	0.0425736	0.297776	0.0304652	0.0448765	0.0552396	0.0792019	0.0253253	1.36457	0.261468
0.920869	0.99645	0.632114	0.0788517	0.577654	0.783508	0.709786	0.691389	0.900277	0.657893	0.976271	0.70519	0.825493	0.818004	0.319973	1.0059	0.370442	0.945598	1.05736	0.0777437	0.919611	0.939753	0.957345	0.219956	0.154801	0.249014	1.06865	0.795478	0.753726	0.913455	0.184851	1.03697	0.265726	0.428612	0.0391032	0.0230399	0.106022	0.0820787	0.0475292	0.0645314	0.522442	0.0401762	0.0746198	0.0891891	0.121686	0.0307216	1.43962	0.473788
0.984183	1.1004	0.937338	0.19741	0.860795	0.972359	1.0598	0.860622	1.15682	0.946621	1.09604	1.0314	1.092	1.03975	0.472967	1.32108	0.679721	1.27152	1.41849	0.273042	1.28562	1.35647	1.38925	0.34282	0.394447	0.406275	1.51797	1.11064	1.0848	1.28907	0.292919	1.45968	0.519877	0.641592	0.081256	0.0805018	0.195694	0.0934058	0.0724062	0.0946618	0.749244	0.0652732	0.115958	0.134212	0.176722	0.059978	1.51467	0.688827
0.904677	1.13127	1.05792	0.614607	0.955724	0.9198	1.12868	0.781855	1.03795	1.09014	1.00309	1.09971	1.09542	1.08933	0.709064	1.38897	1.09409	1.37845	1.39266	0.683386	1.37181	1.42625	1.46502	0.730306	0.811132	0.782239	1.60251	1.24706	1.23391	1.33915	0.700693	1.58451	0.861024	0.94307	0.29356	0.230272	0.431426	0.264721	0.284975	0.154418	1.01129	0.185763	0.348613	0.361949	0.43885	0.237167	1.47739	0.948713
0.82517	1.05858	1.01693	1.0318	0.947137	0.867242	1.10385	0.703089	0.919078	1.02794	0.910131	1.08207	1.01115	1.1389	0.990869	1.45687	1.47527	1.48537	1.36684	1.09373	1.45801	1.43408	1.47719	1.11779	1.22782	1.1582	1.68705	1.22708	1.28293	1.38923	1.10847	1.54551	1.15635	1.24455	0.505865	0.380042	0.667158	0.436036	0.497543	0.214173	1.27334	0.306252	0.581269	0.589686	0.700979	0.414356	1.43672	1.2086
0.755553	0.985904	0.975938	1.23087	0.938551	0.831544	1.07902	0.644935	0.812293	0.965748	0.826221	1.06442	0.926871	1.19263	1.27267	1.46108	1.54121	1.50828	1.34458	1.27092	1.51674	1.44192	1.48937	1.46424	1.2674	1.42656	1.75365	1.20711	1.33194	1.42646	1.47335	1.50651	1.27855	1.46739	0.717546	0.630549	0.939267	0.624446	0.718198	0.408111	1.50363	0.490923	0.811068	0.815297	0.959821	0.646766	1.39604	1.44265
0.762582	0.913223	0.934744	1.14363	0.911147	0.808109	1.02855	0.640371	0.799161	0.903553	0.812404	1.02398	0.864356	1.24938	1.48441	1.44028	1.60714	1.49818	1.32699	1.40697	1.50404	1.43942	1.47523	1.49259	1.29757	1.41516	1.7736	1.18944	1.3635	1.43029	1.50586	1.48859	1.40076	1.48576	0.927606	0.920632	1.25912	0.945341	1.00153	0.778162	1.48779	0.842464	1.01873	1.02444	1.1932	1.02275	1.38425	1.47652
0.769612	0.907568	0.890665	1.05639	0.837743	0.784674	0.95244	0.635808	0.78603	0.852286	0.798588	0.960757	0.823601	1.30612	1.52488	1.41684	1.503	1.48439	1.3094	1.49836	1.49134	1.43244	1.44964	1.52095	1.29826	1.40375	1.79355	1.20414	1.35236	1.43412	1.53836	1.52217	1.34556	1.50413	1.13767	1.1943	1.57898	1.26624	1.28485	1.14821	1.47195	1.19401	1.22639	1.23358	1.42657	1.39874	1.37427	1.51038
0.769583	0.915877	0.846586	1.00026	0.76434	0.763039	0.876334	0.630219	0.77234	0.803295	0.782897	0.897533	0.782847	1.35122	1.56535	1.3616	1.30437	1.42635	1.31828	1.47202	1.46591	1.42545	1.42406	1.53569	1.26482	1.38713	1.76833	1.21884	1.34122	1.4446	1.55711	1.55576	1.24981	1.49354	1.27721	1.27096	1.66292	1.53826	1.53189	1.36203	1.45536	1.40332	1.40128	1.40302	1.60899	1.61168	1.36428	1.53752
0.735441	0.924186	0.802507	0.960988	0.690936	0.741676	0.826335	0.623194	0.755951	0.754305	0.758147	0.850352	0.748866	1.39456	1.60581	1.30636	1.14352	1.3683	1.34149	1.44567	1.42263	1.44616	1.42612	1.48462	1.23139	1.36322	1.67989	1.23355	1.33008	1.4644	1.50933	1.58934	1.17321	1.4424	1.31804	1.34761	1.61907	1.57404	1.60355	1.49122	1.43515	1.4135	1.41775	1.38056	1.54514	1.59638	1.33344	1.53219
0.701299	0.927555	0.782513	0.921714	0.690995	0.71832	0.854655	0.616168	0.739561	0.715021	0.733397	0.851303	0.735206	1.42888	1.63546	1.25141	1.14319	1.33001	1.3647	1.40477	1.37936	1.48995	1.45122	1.43356	1.2038	1.33931	1.59145	1.24685	1.30714	1.4842	1.46156	1.61616	1.12323	1.39126	1.35886	1.35582	1.57523	1.60983	1.6752	1.62042	1.41494	1.42369	1.43422	1.35809	1.48128	1.58108	1.30057	1.52686
0.668059	0.915397	0.778576	0.89652	0.696119	0.684337	0.882975	0.60302	0.720204	0.706241	0.711793	0.852254	0.721546	1.41507	1.66436	1.19682	1.14286	1.31729	1.38213	1.35762	1.35281	1.53374	1.47632	1.3865	1.17651	1.30561	1.53318	1.25923	1.28339	1.46481	1.4247	1.64252	1.07309	1.33269	1.36734	1.27545	1.4991	1.63205	1.72461	1.58073	1.39785	1.40135	1.45282	1.33628	1.43982	1.57058	1.26771	1.52224
0.637864	0.903239	0.774638	0.873526	0.701244	0.650354	0.911294	0.584974	0.69083	0.697461	0.700809	0.853205	0.707886	1.40127	1.69326	1.14223	1.17828	1.30456	1.39866	1.31289	1.33962	1.55144	1.49636	1.35297	1.18074	1.26409	1.49905	1.27161	1.25963	1.41408	1.42468	1.66888	1.01653	1.26819	1.34994	1.19507	1.41792	1.60849	1.69893	1.51465	1.39131	1.35298	1.47865	1.31664	1.4739	1.56391	1.2643	1.52002
0.607669	0.891081	0.767411	0.847531	0.68883	0.640359	0.876678	0.566927	0.661455	0.688682	0.689825	0.827781	0.677546	1.39634	1.66156	1.18687	1.22639	1.33331	1.4157	1.28505	1.32644	1.52901	1.50859	1.31945	1.22524	1.22258	1.46491	1.27982	1.25341	1.36335	1.42466	1.6575	0.959973	1.20368	1.33255	1.1498	1.33538	1.58492	1.67325	1.4556	1.38476	1.30462	1.50448	1.297	1.50799	1.55725	1.26481	1.5178
0.587322	0.870946	0.738799	0.787514	0.663751	0.659995	0.842061	0.564145	0.637099	0.674765	0.678605	0.802356	0.647205	1.40237	1.58609	1.25712	1.26926	1.37276	1.4384	1.25721	1.35983	1.50657	1.52082	1.30209	1.26974	1.21467	1.47355	1.26087	1.25986	1.37439	1.43477	1.61887	0.950395	1.1627	1.29985	1.11359	1.2374	1.56186	1.6322	1.47625	1.36937	1.26726	1.51306	1.28011	1.51925	1.56694	1.26533	1.52218
0.591595	0.846613	0.710186	0.727497	0.638671	0.679631	0.807445	0.56808	0.625289	0.658146	0.666796	0.776932	0.616864	1.40839	1.51063	1.32402	1.29902	1.40863	1.46109	1.28894	1.4137	1.49258	1.53908	1.32514	1.31742	1.22156	1.50102	1.24191	1.26631	1.41261	1.47017	1.58024	0.968658	1.13206	1.26043	1.08222	1.13941	1.54007	1.55273	1.49689	1.3319	1.23474	1.47854	1.27007	1.47343	1.58383	1.24064	1.54306
0.595868	0.82228	0.681574	0.675324	0.615148	0.729585	0.771506	0.572014	0.613478	0.641526	0.654986	0.755578	0.60687	1.40178	1.4497	1.37249	1.32877	1.42484	1.48278	1.36943	1.46757	1.50502	1.5762	1.3482	1.36534	1.22844	1.52848	1.22296	1.28062	1.45084	1.50558	1.55096	0.986851	1.10143	1.22101	1.07743	1.07472	1.51828	1.47326	1.51025	1.29442	1.20223	1.44402	1.26003	1.42762	1.60073	1.2116	1.56393
0.614105	0.79903	0.658671	0.641693	0.596959	0.790367	0.735126	0.619103	0.609703	0.625573	0.655826	0.73558	0.603658	1.39066	1.4386	1.42095	1.35338	1.44106	1.50206	1.44991	1.48905	1.51746	1.61332	1.38254	1.40565	1.27292	1.52207	1.23548	1.32191	1.47096	1.53713	1.55375	1.00481	1.10252	1.17132	1.07263	1.08873	1.48868	1.4196	1.50638	1.26671	1.17163	1.41744	1.25274	1.38741	1.57721	1.18257	1.56727
0.659106	0.790393	0.638623	0.608061	0.578769	0.850385	0.698746	0.674822	0.621328	0.618612	0.680912	0.715583	0.600446	1.37974	1.42749	1.4426	1.37695	1.44513	1.52134	1.48845	1.50404	1.52921	1.64796	1.43851	1.43521	1.32491	1.50889	1.26374	1.36319	1.48747	1.56131	1.55654	1.02277	1.10996	1.11958	1.06752	1.10274	1.44411	1.41543	1.50252	1.25771	1.14143	1.40609	1.25072	1.35796	1.54561	1.15546	1.53699
0.704108	0.781757	0.618575	0.602288	0.56058	0.882117	0.669406	0.730542	0.632954	0.611651	0.705997	0.716572	0.612193	1.37656	1.41639	1.43876	1.39302	1.43766	1.53936	1.52591	1.51904	1.53416	1.65775	1.49448	1.46477	1.3769	1.49571	1.292	1.40448	1.50398	1.58548	1.55933	1.03291	1.1174	1.06784	1.06211	1.12367	1.39955	1.41126	1.51485	1.24872	1.11122	1.39474	1.24869	1.32852	1.51401	1.12876	1.50672
0.739255	0.773121	0.607299	0.622907	0.561596	0.913849	0.647105	0.761832	0.645455	0.604691	0.724116	0.738548	0.638899	1.37337	1.4489	1.43493	1.39692	1.4302	1.55618	1.55431	1.51973	1.53911	1.66755	1.53304	1.47477	1.3971	1.48495	1.32079	1.4308	1.50057	1.60088	1.55788	1.04153	1.11898	1.08414	1.0567	1.15115	1.36525	1.40542	1.54252	1.22891	1.1159	1.38815	1.24796	1.29833	1.43477	1.10206	1.45972
0.75962	0.772795	0.631108	0.643526	0.565458	0.932148	0.624805	0.792425	0.659271	0.602958	0.731786	0.760524	0.665605	1.37245	1.48788	1.42954	1.40081	1.43021	1.573	1.56913	1.52001	1.54406	1.67735	1.54549	1.48264	1.4164	1.47426	1.35174	1.45491	1.4966	1.6031	1.55581	1.05637	1.1204	1.1024	1.0105	1.17862	1.34634	1.39709	1.57019	1.19288	1.12158	1.38868	1.24915	1.26702	1.35417	1.09862	1.38763
0.779985	0.781373	0.654917	0.685054	0.56932	0.921343	0.614203	0.81775	0.673087	0.606828	0.739455	0.775831	0.68994	1.37644	1.52685	1.42391	1.40499	1.43133	1.56284	1.58395	1.52086	1.5198	1.664	1.55795	1.48724	1.43351	1.46479	1.38269	1.47902	1.4923	1.60532	1.55373	1.07906	1.11974	1.11715	0.958312	1.20404	1.32744	1.38876	1.56085	1.15684	1.12739	1.38921	1.25034	1.23572	1.27767	1.10121	1.31553
0.787647	0.789952	0.678726	0.734326	0.592554	0.910537	0.638697	0.800931	0.680245	0.610698	0.743737	0.771131	0.707159	1.38042	1.55103	1.41758	1.4092	1.4318	1.54267	1.57633	1.5262	1.49366	1.64916	1.56659	1.48671	1.43307	1.46503	1.41364	1.4906	1.48541	1.60544	1.54007	1.10127	1.10247	1.10392	0.910542	1.22869	1.30183	1.36492	1.5378	1.12979	1.13416	1.37111	1.24073	1.21371	1.234	1.1038	1.25492
0.780226	0.79853	0.705281	0.783599	0.633951	0.898159	0.663191	0.784112	0.679496	0.614568	0.743996	0.766432	0.724379	1.38697	1.56133	1.40887	1.4073	1.43012	1.5225	1.56395	1.53153	1.46752	1.63431	1.57072	1.48619	1.43262	1.46528	1.42945	1.49046	1.47852	1.60307	1.51555	1.1135	1.08519	1.09068	0.877507	1.25334	1.26828	1.32267	1.51476	1.11341	1.14094	1.3309	1.21831	1.20275	1.19033	1.11567	1.20795
0.772804	0.805891	0.732833	0.816331	0.675348	0.884755	0.687685	0.769055	0.678747	0.621335	0.744255	0.761732	0.741599	1.39519	1.57163	1.40017	1.3987	1.42845	1.50318	1.54748	1.53353	1.45272	1.62667	1.57485	1.4772	1.43128	1.4626	1.43977	1.49031	1.47053	1.6007	1.49102	1.12573	1.07432	1.07786	0.844473	1.2739	1.23473	1.28042	1.45596	1.09702	1.14868	1.29068	1.19588	1.19179	1.15545	1.13039	1.16098
0.7672	0.813113	0.760386	0.848119	0.713984	0.871351	0.724067	0.759283	0.676381	0.628437	0.741892	0.754489	0.743731	1.40341	1.57932	1.39041	1.39016	1.42186	1.48391	1.51872	1.52551	1.44099	1.62096	1.57464	1.46703	1.42721	1.45114	1.45008	1.48927	1.4592	1.59351	1.46913	1.13464	1.08266	1.06629	0.839917	1.29422	1.21086	1.24466	1.39513	1.09789	1.15932	1.25995	1.18275	1.19234	1.14696	1.14512	1.14177
0.763312	0.820334	0.78077	0.875631	0.738262	0.871629	0.760449	0.74951	0.67249	0.635538	0.737054	0.747245	0.745863	1.40195	1.57341	1.37993	1.38381	1.41186	1.46588	1.48996	1.5175	1.42925	1.61526	1.57035	1.45269	1.42314	1.43968	1.45464	1.48356	1.44786	1.58179	1.46092	1.14175	1.09099	1.05471	0.855172	1.31376	1.19614	1.21504	1.33971	1.11504	1.16997	1.23818	1.17839	1.20377	1.13847	1.15624	1.14878
0.759424	0.824803	0.781439	0.881054	0.762539	0.873516	0.796831	0.741223	0.668598	0.641085	0.732215	0.740002	0.747995	1.39935	1.56751	1.36944	1.37747	1.40186	1.45422	1.46944	1.50636	1.41444	1.59281	1.56605	1.43112	1.41595	1.42539	1.44341	1.47785	1.43679	1.57006	1.45271	1.14748	1.10021	1.0545	0.870427	1.32924	1.18142	1.18542	1.31232	1.13219	1.18443	1.21641	1.17403	1.2152	1.14026	1.16606	1.15579
0.756905	0.823153	0.782108	0.886477	0.786816	0.873616	0.809273	0.735272	0.665019	0.643175	0.73014	0.728706	0.74966	1.39736	1.56161	1.34066	1.37297	1.39284	1.44256	1.4529	1.49032	1.39788	1.5608	1.55374	1.40954	1.40386	1.40664	1.43218	1.47214	1.42612	1.55575	1.4445	1.14919	1.11082	1.07216	0.886475	1.34472	1.18065	1.1771	1.28493	1.15089	1.2049	1.21642	1.17938	1.23381	1.15819	1.17588	1.16931
0.755413	0.821504	0.782778	0.88427	0.782591	0.865802	0.813736	0.72932	0.661674	0.645265	0.730137	0.71606	0.751168	1.39808	1.55052	1.31089	1.36985	1.38387	1.4309	1.43677	1.47427	1.38131	1.52878	1.53543	1.40121	1.39177	1.38789	1.42094	1.46276	1.41546	1.53951	1.42864	1.1509	1.12143	1.08981	0.902566	1.35673	1.19034	1.18475	1.26955	1.17075	1.22536	1.23277	1.19201	1.25782	1.17612	1.18116	1.18773
0.75392	0.819854	0.782803	0.869529	0.771524	0.857988	0.818198	0.726105	0.658329	0.647355	0.730135	0.703413	0.752677	1.3988	1.53819	1.28683	1.36619	1.37371	1.41924	1.42432	1.45256	1.3717	1.50723	1.51711	1.39514	1.37663	1.37042	1.40761	1.4525	1.40605	1.52326	1.41094	1.14712	1.12813	1.10724	0.917886	1.36304	1.20004	1.19239	1.2739	1.1906	1.24801	1.24912	1.20464	1.28183	1.19909	1.18455	1.20614
0.756498	0.82207	0.782667	0.854788	0.760458	0.853193	0.817921	0.725339	0.660016	0.650963	0.733896	0.697096	0.75444	1.39607	1.52585	1.27564	1.35859	1.3609	1.40758	1.41187	1.42578	1.36949	1.4968	1.50304	1.38864	1.35874	1.35411	1.39375	1.44224	1.39777	1.50396	1.39325	1.14245	1.13132	1.12447	0.931471	1.36936	1.21432	1.20678	1.27825	1.20316	1.27261	1.27394	1.22247	1.30126	1.22656	1.18794	1.22678
0.76148	0.825758	0.782531	0.850696	0.755666	0.851755	0.812903	0.724573	0.664677	0.655149	0.739881	0.697109	0.756456	1.3895	1.51235	1.26445	1.35099	1.34808	1.39452	1.40265	1.399	1.36727	1.48636	1.49148	1.38131	1.34086	1.33779	1.37989	1.42954	1.3895	1.48286	1.37666	1.13273	1.13452	1.1417	0.945057	1.36462	1.23132	1.22515	1.28246	1.2114	1.29721	1.30375	1.24336	1.31799	1.25403	1.1886	1.24874
0.766463	0.829446	0.784291	0.853864	0.758494	0.850317	0.807886	0.72137	0.669338	0.659335	0.745866	0.697122	0.758472	1.38293	1.49745	1.25067	1.34478	1.31795	1.38049	1.39636	1.3835	1.36259	1.47414	1.47992	1.37399	1.32343	1.31758	1.36435	1.41389	1.37439	1.46175	1.36143	1.11721	1.13822	1.15648	0.959747	1.35235	1.24832	1.24353	1.28659	1.21964	1.31289	1.33356	1.26426	1.33472	1.28021	1.18796	1.2707
0.770928	0.833573	0.789844	0.857033	0.761322	0.846564	0.804852	0.716947	0.675771	0.664625	0.743278	0.697839	0.76385	1.36785	1.48254	1.23561	1.33927	1.27917	1.36647	1.39007	1.37364	1.35299	1.45834	1.46463	1.36702	1.30623	1.29543	1.34547	1.39823	1.35586	1.43888	1.34619	1.10106	1.14218	1.17004	0.974991	1.34008	1.25846	1.25755	1.29071	1.22366	1.32412	1.35327	1.28157	1.34632	1.30573	1.18732	1.28457
0.775154	0.840445	0.795396	0.865643	0.763995	0.842093	0.807763	0.712525	0.683017	0.676813	0.736761	0.700668	0.779313	1.35012	1.46703	1.22043	1.32729	1.24092	1.34877	1.38083	1.36379	1.34338	1.44254	1.44764	1.36013	1.28903	1.27327	1.32658	1.38252	1.33734	1.41519	1.3311	1.07663	1.14613	1.1836	0.989856	1.32513	1.26544	1.26957	1.28667	1.22573	1.33535	1.36836	1.29724	1.35556	1.33125	1.17964	1.29474
0.779381	0.847316	0.800948	0.875524	0.76522	0.837613	0.810675	0.707791	0.690263	0.689002	0.730244	0.703496	0.794776	1.3324	1.44599	1.20104	1.29163	1.22306	1.3302	1.37144	1.34697	1.33191	1.42562	1.43065	1.35002	1.26821	1.24919	1.3077	1.36631	1.31431	1.39151	1.31732	1.05221	1.14462	1.19395	0.990316	1.30954	1.27243	1.28159	1.28073	1.22781	1.33682	1.38345	1.31291	1.36481	1.34455	1.16813	1.30491
0.777437	0.854188	0.809381	0.885201	0.766445	0.832981	0.813587	0.702983	0.692793	0.70119	0.717011	0.706325	0.810239	1.3147	1.42494	1.18166	1.25597	1.2052	1.3116	1.36267	1.32848	1.31202	1.40367	1.41257	1.33298	1.2465	1.22466	1.28897	1.3501	1.29019	1.36606	1.30354	1.02503	1.1418	1.20352	0.990776	1.29381	1.27114	1.28419	1.27476	1.22261	1.33594	1.39653	1.32306	1.36702	1.3549	1.15662	1.30274
0.773356	0.860623	0.818258	0.887563	0.76767	0.828348	0.817524	0.698175	0.693692	0.712498	0.701452	0.709695	0.795365	1.297	1.4039	1.15976	1.23082	1.18836	1.2916	1.35495	1.30999	1.29213	1.38172	1.3941	1.31594	1.2248	1.20012	1.27027	1.33389	1.26608	1.34	1.28976	0.996512	1.13897	1.21309	0.988394	1.27271	1.26699	1.28353	1.26792	1.21489	1.33507	1.40891	1.33129	1.36679	1.36525	1.13913	1.2963
0.769274	0.866704	0.827134	0.889926	0.769461	0.822589	0.821462	0.691391	0.69459	0.72309	0.685893	0.713065	0.780492	1.2777	1.38588	1.13387	1.20897	1.17316	1.2716	1.34722	1.29624	1.27199	1.35967	1.37564	1.29807	1.19668	1.17639	1.25156	1.31766	1.24259	1.31394	1.26654	0.969417	1.1291	1.21523	0.981465	1.25161	1.26284	1.28287	1.26109	1.20717	1.32765	1.42129	1.33953	1.36656	1.36404	1.11794	1.28986
0.767119	0.872784	0.83404	0.892235	0.771448	0.814663	0.825399	0.684491	0.695534	0.733682	0.668495	0.716435	0.765618	1.25533	1.36891	1.10797	1.18685	1.15796	1.25157	1.33	1.28277	1.24391	1.33451	1.35037	1.27999	1.16819	1.15271	1.23154	1.30141	1.21914	1.29646	1.24004	0.945989	1.11882	1.21693	0.974537	1.22977	1.25305	1.27678	1.25101	1.18789	1.31986	1.42371	1.33601	1.35539	1.36215	1.09675	1.27067
0.765444	0.878865	0.83799	0.894378	0.773436	0.806736	0.825565	0.678086	0.69649	0.744274	0.650637	0.719167	0.756843	1.23296	1.35195	1.08493	1.16417	1.13351	1.23143	1.3104	1.26843	1.21583	1.30936	1.32341	1.26016	1.13965	1.12816	1.20954	1.28517	1.19488	1.28112	1.21354	0.922562	1.10804	1.21767	0.951316	1.20561	1.24185	1.26934	1.23085	1.16572	1.31063	1.42365	1.32956	1.3415	1.35953	1.07081	1.24829
0.76377	0.881579	0.84194	0.896521	0.772804	0.802124	0.824472	0.677128	0.697445	0.738755	0.632779	0.721688	0.750102	1.20929	1.33271	1.06289	1.14148	1.10587	1.21129	1.28997	1.24458	1.18775	1.2842	1.29645	1.23606	1.11065	1.09404	1.18754	1.26673	1.1618	1.26579	1.18727	0.886182	1.09181	1.20786	0.922477	1.18145	1.23065	1.2619	1.2107	1.14354	1.28568	1.42358	1.3231	1.3276	1.34882	1.04155	1.22591
0.763087	0.884173	0.84589	0.898135	0.768023	0.799445	0.82338	0.676169	0.697291	0.73266	0.624681	0.724208	0.74336	1.18486	1.30987	1.04011	1.11196	1.07873	1.1866	1.26667	1.22072	1.15706	1.25839	1.26915	1.21197	1.08165	1.05993	1.16554	1.24483	1.12872	1.247	1.16139	0.848099	1.07557	1.19804	0.893122	1.15609	1.21058	1.24143	1.1851	1.11597	1.26073	1.4122	1.3083	1.30891	1.33812	1.01229	1.19695
0.762569	0.886767	0.844253	0.899125	0.763242	0.796766	0.81775	0.678873	0.696951	0.726565	0.618209	0.725814	0.739407	1.16043	1.28704	1.01088	1.0813	1.05604	1.15656	1.24336	1.19633	1.126	1.2325	1.2418	1.19197	1.05143	1.02725	1.13711	1.22293	1.09408	1.22765	1.13551	0.809715	1.05711	1.18631	0.859252	1.12932	1.18904	1.2188	1.15311	1.0875	1.23422	1.39895	1.29211	1.28942	1.32561	0.98045	1.16689
0.762052	0.887619	0.842218	0.900115	0.758349	0.788929	0.807584	0.694394	0.696611	0.718952	0.611737	0.726507	0.738243	1.13567	1.26417	0.981657	1.05094	1.03336	1.12651	1.21813	1.17004	1.09494	1.20661	1.21444	1.17312	1.01695	0.999537	1.10821	1.20106	1.05397	1.20829	1.10929	0.771017	1.03087	1.1679	0.825381	1.10254	1.1675	1.19616	1.12112	1.05902	1.20222	1.38569	1.27592	1.26993	1.3068	0.94658	1.13683
0.762363	0.88562	0.840183	0.900952	0.750106	0.780651	0.797418	0.709916	0.687426	0.708854	0.625196	0.727199	0.737079	1.11088	1.24018	0.953946	1.02101	1.01096	1.09976	1.19186	1.14375	1.06448	1.17507	1.1877	1.1511	0.98248	0.971828	1.07932	1.1804	1.01387	1.18149	1.07277	0.732138	1.00463	1.1495	0.794962	1.07221	1.13571	1.16751	1.08529	1.02511	1.17021	1.36368	1.25179	1.24455	1.288	0.91271	1.09348
0.762753	0.883621	0.834458	0.901716	0.741863	0.77254	0.78422	0.719214	0.677411	0.698756	0.640523	0.726458	0.732441	1.08597	1.21619	0.928003	0.991077	0.988918	1.07459	1.16595	1.12066	1.03424	1.14143	1.16102	1.12043	0.949717	0.94439	1.0521	1.15974	0.976557	1.15398	1.03626	0.691503	0.97899	1.12933	0.768572	1.04017	1.10296	1.13829	1.04763	0.990696	1.13451	1.34086	1.22691	1.21861	1.26673	0.876831	1.04889
0.763142	0.881623	0.824518	0.90248	0.733621	0.76506	0.761927	0.717501	0.667395	0.688659	0.655849	0.721417	0.717382	1.0606	1.1922	0.902059	0.961084	0.966872	1.04942	1.14467	1.10322	1.00401	1.10778	1.13434	1.08975	0.919984	0.91743	1.02677	1.13907	0.94419	1.12648	0.999749	0.650867	0.95443	1.10603	0.742181	1.00813	1.07022	1.10908	1.00996	0.956279	1.09225	1.31803	1.20204	1.19268	1.24109	0.839167	1.00429
0.758124	0.879383	0.814578	0.902017	0.724992	0.75758	0.739633	0.715788	0.652326	0.672848	0.657254	0.716375	0.702323	1.03522	1.16604	0.882484	0.931088	0.940837	1.02095	1.12338	1.08579	0.973437	1.07892	1.1003	1.0644	0.890251	0.890471	1.00144	1.11607	0.911822	1.09995	0.962803	0.60855	0.929869	1.08274	0.71972	0.970426	1.03306	1.07164	0.968975	0.917071	1.04999	1.28454	1.16685	1.16194	1.21546	0.801503	0.963212
0.752947	0.877081	0.804638	0.901405	0.71618	0.749436	0.71734	0.715713	0.637107	0.655546	0.658249	0.711334	0.687263	1.01016	1.13885	0.864302	0.900475	0.913929	0.992073	1.10134	1.06315	0.942627	1.05358	1.06604	1.04075	0.858411	0.862017	0.976106	1.09196	0.881217	1.07345	0.92565	0.565504	0.901069	1.05449	0.69812	0.932042	0.995779	1.03396	0.927587	0.877722	1.00427	1.25074	1.13136	1.13106	1.18862	0.762503	0.922235
0.748118	0.874778	0.794865	0.902054	0.707367	0.740628	0.727242	0.717277	0.621554	0.638244	0.659199	0.700761	0.683578	0.985415	1.11167	0.845341	0.869244	0.888994	0.96326	1.07856	1.03532	0.911817	1.02824	1.03195	1.01643	0.824465	0.832069	0.940111	1.06785	0.852376	1.04703	0.888497	0.523346	0.868029	1.0213	0.678533	0.892735	0.958425	0.99601	0.885625	0.83842	0.955097	1.21674	1.09566	1.10004	1.1606	0.722167	0.881244
0.755141	0.872368	0.785092	0.913099	0.700138	0.731821	0.737144	0.71884	0.594627	0.622761	0.658627	0.690189	0.679893	0.960668	1.08577	0.822816	0.838259	0.873077	0.934946	1.05578	1.00749	0.883563	0.998799	1.0034	0.990005	0.79052	0.802121	0.904115	1.04431	0.823534	1.02338	0.853634	0.483238	0.834989	0.988096	0.668151	0.845814	0.918671	0.948981	0.838928	0.800742	0.90592	1.17612	1.05272	1.0645	1.13257	0.681831	0.839803
0.762163	0.869544	0.775318	0.924144	0.696232	0.74176	0.747046	0.715539	0.5677	0.614251	0.658054	0.679617	0.676208	0.935104	1.06258	0.800292	0.812203	0.85716	0.906632	1.02825	0.979729	0.858777	0.963781	0.974848	0.963577	0.766265	0.777062	0.868119	1.02194	0.797178	0.999727	0.82358	0.443129	0.799626	0.949286	0.65777	0.798894	0.878918	0.901952	0.792231	0.763063	0.859874	1.1355	1.00978	1.02896	1.10085	0.641971	0.798361
0.768162	0.86672	0.761991	0.929641	0.692325	0.756698	0.720463	0.709488	0.543885	0.605741	0.65723	0.678127	0.66412	0.909321	1.03939	0.777811	0.786147	0.840842	0.87952	1.00034	0.952008	0.833992	0.928763	0.946532	0.93513	0.747489	0.754766	0.837033	0.999577	0.772227	0.975593	0.793525	0.413212	0.762951	0.907307	0.648019	0.752692	0.839107	0.854854	0.74727	0.724946	0.815599	1.09454	0.966319	0.992942	1.06703	0.602646	0.756501
0.763239	0.863896	0.745553	0.923578	0.688419	0.769387	0.681717	0.703437	0.553267	0.597231	0.653726	0.679665	0.649231	0.883512	1.0162	0.755368	0.757476	0.824178	0.854914	0.974168	0.924287	0.807511	0.896491	0.920725	0.905943	0.728712	0.73247	0.810243	0.977212	0.747275	0.946329	0.763471	0.384339	0.726275	0.865327	0.638808	0.707984	0.798683	0.80702	0.705922	0.682141	0.771323	1.04997	0.917345	0.951906	1.03321	0.56332	0.710168
0.758316	0.84757	0.729115	0.917516	0.679685	0.755833	0.642971	0.695157	0.562649	0.590082	0.650222	0.681203	0.634343	0.857392	0.999996	0.732924	0.727029	0.807515	0.830307	0.951238	0.901269	0.776507	0.871543	0.894919	0.87663	0.710291	0.711586	0.783453	0.952181	0.719129	0.917066	0.739653	0.36033	0.689928	0.824153	0.629597	0.663277	0.75826	0.759186	0.664574	0.639336	0.725525	1.00539	0.86837	0.910871	0.996308	0.526759	0.663835
0.753338	0.822993	0.712502	0.91041	0.670791	0.74228	0.623246	0.68624	0.56815	0.583765	0.645784	0.673131	0.612544	0.831273	0.984026	0.71283	0.695702	0.783217	0.803789	0.928308	0.879594	0.745503	0.846594	0.868047	0.846867	0.69197	0.691105	0.756889	0.927061	0.69007	0.888694	0.716043	0.340964	0.653673	0.783209	0.619304	0.618577	0.718435	0.711	0.623664	0.598212	0.679292	0.959984	0.820021	0.869215	0.958525	0.493701	0.618476
0.748036	0.798415	0.69344	0.902418	0.661896	0.7264	0.622543	0.677323	0.550364	0.577447	0.635745	0.655448	0.583836	0.807194	0.968057	0.693004	0.659104	0.758046	0.775645	0.903001	0.857919	0.71478	0.821229	0.834778	0.817104	0.67365	0.670624	0.733488	0.901941	0.661011	0.865676	0.692433	0.32266	0.617419	0.742265	0.608887	0.573882	0.6822	0.660701	0.583128	0.567176	0.633059	0.909569	0.775421	0.823838	0.920741	0.460643	0.578956
0.742735	0.773724	0.674378	0.894427	0.64656	0.706534	0.62184	0.668246	0.532579	0.570667	0.625707	0.637766	0.555128	0.786614	0.956241	0.673249	0.622506	0.733813	0.747502	0.877004	0.83159	0.686089	0.792846	0.80151	0.797407	0.651867	0.648299	0.710087	0.879839	0.635664	0.842658	0.666835	0.312425	0.581949	0.701762	0.597784	0.529187	0.645966	0.610402	0.542591	0.53614	0.598477	0.859154	0.73082	0.778461	0.876307	0.425965	0.539437
0.73604	0.745832	0.655316	0.87842	0.627156	0.686668	0.616551	0.659156	0.516222	0.550937	0.616861	0.620556	0.529654	0.766034	0.947049	0.653699	0.583343	0.712298	0.720196	0.850716	0.804838	0.657398	0.764462	0.770526	0.781875	0.629769	0.625805	0.686685	0.859644	0.610655	0.819336	0.639981	0.30219	0.54655	0.661299	0.584688	0.479866	0.6103	0.561615	0.501107	0.506407	0.564954	0.809373	0.685308	0.734156	0.831269	0.388975	0.501551
0.723774	0.71794	0.641898	0.859838	0.607752	0.666409	0.597504	0.649645	0.505577	0.531206	0.612786	0.604765	0.513884	0.740272	0.937856	0.63415	0.54303	0.690782	0.693159	0.823263	0.778108	0.628707	0.736078	0.748676	0.763039	0.607832	0.603349	0.663708	0.839449	0.585746	0.794795	0.613127	0.292917	0.510872	0.620765	0.571592	0.429058	0.576904	0.518878	0.459318	0.481886	0.531693	0.76213	0.636149	0.694137	0.786633	0.351984	0.470202
0.711509	0.690049	0.632244	0.841256	0.586981	0.645946	0.578458	0.632982	0.494933	0.511476	0.608712	0.588974	0.498113	0.711814	0.926303	0.613828	0.50396	0.667923	0.666123	0.795809	0.751753	0.604868	0.700797	0.726826	0.730574	0.588615	0.581511	0.641013	0.817507	0.562549	0.770255	0.589966	0.284016	0.470436	0.579038	0.560585	0.37825	0.543509	0.476141	0.417529	0.457366	0.502884	0.714886	0.58699	0.654118	0.748837	0.316047	0.438853
0.699056	0.662613	0.62259	0.814598	0.562278	0.625483	0.559412	0.61632	0.483052	0.499026	0.600035	0.573183	0.482343	0.683357	0.907963	0.593023	0.46887	0.644224	0.639314	0.764606	0.725398	0.581181	0.6653	0.700968	0.698109	0.569398	0.559673	0.618318	0.790542	0.539351	0.744562	0.577421	0.276032	0.43	0.53731	0.550883	0.331489	0.511227	0.435755	0.38154	0.434623	0.474076	0.666527	0.538175	0.613478	0.711041	0.281813	0.409903
0.686064	0.635738	0.611625	0.787717	0.537575	0.605387	0.539036	0.598588	0.467599	0.495538	0.578065	0.549845	0.477434	0.661762	0.889623	0.572218	0.43378	0.620526	0.612512	0.731154	0.697752	0.557494	0.629803	0.663534	0.663318	0.549973	0.537113	0.595411	0.763578	0.515983	0.715541	0.564876	0.269947	0.389893	0.49696	0.541181	0.28484	0.482161	0.402164	0.345713	0.417017	0.447423	0.614945	0.490351	0.571044	0.674413	0.247579	0.387884
0.673072	0.608864	0.592145	0.759297	0.512871	0.585312	0.518661	0.576425	0.452146	0.492049	0.556094	0.526507	0.472525	0.640549	0.871283	0.551223	0.39572	0.597131	0.584705	0.69758	0.664756	0.527345	0.597699	0.626099	0.627446	0.529688	0.511562	0.571127	0.736613	0.491907	0.686521	0.55233	0.263863	0.351152	0.46232	0.526359	0.244147	0.453094	0.368572	0.310902	0.39941	0.429693	0.563363	0.442527	0.52861	0.64262	0.221942	0.365865
0.65451	0.581989	0.572665	0.724284	0.532118	0.562059	0.498286	0.554261	0.439583	0.488561	0.53404	0.503169	0.467617	0.61835	0.850596	0.530223	0.35685	0.573744	0.55259	0.661712	0.631761	0.495759	0.56635	0.590569	0.592368	0.509402	0.486011	0.546842	0.710664	0.467831	0.658031	0.53285	0.259187	0.31241	0.42768	0.511402	0.228977	0.429317	0.341226	0.280447	0.384414	0.411963	0.51095	0.395162	0.486374	0.610827	0.212065	0.346029
0.623796	0.556785	0.553185	0.68927	0.556074	0.528566	0.483135	0.533257	0.433325	0.484907	0.511802	0.476351	0.470231	0.592978	0.829659	0.50818	0.319872	0.548262	0.520476	0.625844	0.60278	0.464174	0.535	0.559191	0.561141	0.486604	0.460972	0.522557	0.684823	0.442794	0.630702	0.512626	0.254616	0.277691	0.395432	0.496795	0.213807	0.417078	0.327508	0.249992	0.375116	0.394935	0.456725	0.348797	0.444571	0.581095	0.202189	0.330956
0.593083	0.531847	0.532209	0.652577	0.58003	0.495073	0.469726	0.514572	0.427067	0.481226	0.489565	0.448372	0.475352	0.567605	0.808721	0.484052	0.286679	0.518587	0.48969	0.592189	0.581829	0.428991	0.509757	0.527813	0.529914	0.458782	0.436957	0.497597	0.658983	0.415833	0.603373	0.492403	0.250319	0.251017	0.367969	0.48289	0.199895	0.404839	0.313789	0.224084	0.365818	0.379308	0.4025	0.302432	0.402769	0.555484	0.194716	0.315882
0.561048	0.50691	0.510486	0.61342	0.575375	0.468097	0.456316	0.495887	0.423771	0.477546	0.466266	0.420394	0.480474	0.541706	0.785703	0.459925	0.253485	0.488913	0.460852	0.56098	0.560878	0.39201	0.487569	0.496261	0.4987	0.43096	0.412941	0.472301	0.635447	0.388873	0.57294	0.47254	0.246259	0.224343	0.340506	0.468985	0.187828	0.392075	0.300089	0.204844	0.356891	0.363681	0.351578	0.262266	0.366763	0.529873	0.192268	0.303562
0.526778	0.482491	0.488762	0.574263	0.547159	0.446987	0.444729	0.46962	0.425487	0.473051	0.441171	0.397965	0.482673	0.515334	0.760972	0.435807	0.224118	0.458707	0.432014	0.529772	0.534472	0.355029	0.46538	0.464417	0.467492	0.403141	0.389435	0.447004	0.61381	0.362892	0.537254	0.452975	0.241876	0.206144	0.319037	0.455569	0.175761	0.378422	0.28642	0.185604	0.34859	0.349171	0.306246	0.232594	0.340569	0.504468	0.18982	0.295902
0.492507	0.459431	0.470776	0.528828	0.518943	0.425876	0.434965	0.434877	0.427204	0.466415	0.416076	0.381085	0.481949	0.488962	0.736241	0.411693	0.195267	0.428266	0.402886	0.496766	0.501969	0.32527	0.440583	0.432573	0.436626	0.375324	0.366499	0.421945	0.592173	0.338006	0.501568	0.433409	0.235501	0.197418	0.304266	0.442372	0.165744	0.364768	0.27275	0.174934	0.340288	0.335907	0.260914	0.202921	0.314375	0.479293	0.186911	0.288241
0.465093	0.436371	0.467736	0.479573	0.498184	0.40797	0.425201	0.400134	0.427132	0.459779	0.394945	0.364205	0.481225	0.461648	0.711875	0.387374	0.168124	0.397776	0.373582	0.46356	0.469467	0.302307	0.413331	0.398416	0.407757	0.347506	0.343563	0.397837	0.569287	0.313119	0.469369	0.415243	0.229126	0.188693	0.289495	0.429189	0.156975	0.352702	0.261108	0.169481	0.331634	0.322643	0.225439	0.180562	0.292831	0.454118	0.182893	0.279432
0.446822	0.413311	0.464695	0.430318	0.508499	0.390787	0.4163	0.384184	0.424677	0.453143	0.379098	0.352082	0.477921	0.434122	0.689029	0.35926	0.143257	0.366389	0.344278	0.430148	0.43943	0.279344	0.38608	0.361178	0.378889	0.319777	0.323066	0.373728	0.541194	0.286555	0.441819	0.402908	0.22087	0.181648	0.276325	0.416279	0.148205	0.342752	0.252167	0.164029	0.322509	0.310177	0.203106	0.167955	0.277488	0.431196	0.178875	0.26909
0.42855	0.40306	0.461655	0.387999	0.518813	0.376678	0.409986	0.380192	0.422223	0.442023	0.363252	0.354234	0.466875	0.405956	0.666183	0.331146	0.118389	0.335001	0.319353	0.396305	0.410964	0.255546	0.359777	0.323939	0.349165	0.292104	0.30412	0.34962	0.513102	0.258923	0.414269	0.390572	0.211967	0.175672	0.264173	0.403368	0.144235	0.332801	0.243227	0.159484	0.313384	0.298217	0.180773	0.155347	0.262145	0.409708	0.175233	0.258748
0.417217	0.398572	0.471753	0.347022	0.529128	0.388704	0.403672	0.376201	0.415411	0.428886	0.35314	0.356385	0.455829	0.372352	0.643337	0.303514	0.103089	0.30281	0.295275	0.362462	0.382497	0.230284	0.335134	0.290505	0.318949	0.264431	0.285175	0.325142	0.485009	0.231292	0.386135	0.378236	0.203231	0.169697	0.252021	0.389588	0.141194	0.322545	0.234507	0.155115	0.303055	0.286257	0.164066	0.145632	0.248095	0.38822	0.172639	0.249184
0.413231	0.394085	0.486628	0.308377	0.530193	0.400731	0.397358	0.389416	0.403985	0.415748	0.3491	0.358536	0.444783	0.338747	0.61684	0.276576	0.0880229	0.269463	0.271213	0.33046	0.356184	0.205022	0.310492	0.261098	0.288589	0.242856	0.269086	0.30053	0.456127	0.207747	0.357384	0.362558	0.19481	0.163588	0.243073	0.374559	0.137808	0.311966	0.226022	0.150722	0.291452	0.270491	0.153316	0.138977	0.235412	0.365471	0.170045	0.240443
0.409245	0.390877	0.501504	0.310525	0.529479	0.407473	0.38721	0.408367	0.392559	0.402239	0.34506	0.358536	0.43032	0.304978	0.589641	0.249638	0.0735406	0.236117	0.247427	0.299071	0.330589	0.180742	0.285003	0.231691	0.2572	0.223314	0.253949	0.275918	0.427093	0.185565	0.328633	0.346237	0.186388	0.157434	0.235192	0.35953	0.128381	0.301386	0.217537	0.145908	0.279849	0.253457	0.142566	0.132323	0.22273	0.342301	0.166597	0.231702
0.405139	0.39876	0.513722	0.312672	0.528765	0.406114	0.377062	0.427318	0.376879	0.385513	0.340132	0.358536	0.415857	0.270958	0.562442	0.227693	0.0595894	0.20882	0.22364	0.268327	0.304995	0.160114	0.25637	0.205706	0.225811	0.203772	0.238813	0.251433	0.398059	0.163383	0.302944	0.329916	0.176085	0.15128	0.227311	0.346435	0.118954	0.28821	0.208256	0.141095	0.267119	0.236422	0.133231	0.125574	0.21234	0.319131	0.160372	0.223546
0.400933	0.406643	0.518632	0.3138	0.521127	0.404755	0.366914	0.399447	0.357616	0.368787	0.334455	0.358536	0.401393	0.236938	0.532907	0.207247	0.0464135	0.183339	0.200641	0.240625	0.280975	0.139486	0.227738	0.182604	0.20013	0.183459	0.220299	0.227298	0.371143	0.140572	0.279832	0.313229	0.165691	0.148527	0.217555	0.333921	0.110721	0.272848	0.198305	0.136063	0.253439	0.223697	0.125089	0.118746	0.203881	0.296995	0.154147	0.215883
0.396727	0.414527	0.523543	0.312175	0.506102	0.401212	0.350757	0.365723	0.338352	0.35206	0.328778	0.350213	0.382557	0.205655	0.500881	0.187087	0.0433173	0.158904	0.179769	0.212922	0.257151	0.119429	0.199653	0.159501	0.178102	0.16305	0.201363	0.203162	0.346489	0.117682	0.25672	0.29615	0.155707	0.146198	0.207564	0.320348	0.105709	0.257485	0.188354	0.13044	0.239759	0.211511	0.116946	0.111918	0.195423	0.274989	0.147878	0.208219
0.385241	0.418035	0.528453	0.31055	0.491077	0.396661	0.332597	0.332996	0.317959	0.333691	0.319842	0.339116	0.362264	0.175637	0.468856	0.168874	0.0402211	0.141583	0.158897	0.186102	0.233316	0.108217	0.18006	0.140724	0.156301	0.142876	0.182619	0.179027	0.321834	0.095004	0.234644	0.279071	0.146047	0.143793	0.197643	0.299576	0.100697	0.241905	0.178894	0.124817	0.227814	0.199204	0.111954	0.105186	0.184248	0.253011	0.141435	0.202033
0.368901	0.41746	0.523217	0.304949	0.474609	0.39211	0.314436	0.335193	0.296813	0.313788	0.308734	0.328019	0.341971	0.145618	0.43705	0.150661	0.0382482	0.124263	0.139392	0.15987	0.209062	0.097005	0.160466	0.124829	0.136597	0.130967	0.17059	0.158105	0.297058	0.0797346	0.21326	0.261819	0.136183	0.138694	0.190195	0.278804	0.0928221	0.226179	0.16976	0.121396	0.217025	0.182689	0.109063	0.0985174	0.171263	0.232031	0.134993	0.196832
0.352562	0.416885	0.515443	0.295152	0.448393	0.377158	0.294077	0.33739	0.275666	0.293885	0.297626	0.314284	0.319877	0.123246	0.406732	0.133767	0.0369665	0.110137	0.121329	0.133924	0.184808	0.0857932	0.140873	0.108935	0.116893	0.119058	0.15856	0.137988	0.271467	0.0644652	0.191876	0.243401	0.125275	0.133594	0.182746	0.261152	0.0819249	0.210454	0.160626	0.120297	0.206236	0.166175	0.106171	0.0918488	0.158278	0.21105	0.128163	0.191631
0.333922	0.41631	0.50767	0.285356	0.422176	0.361924	0.271517	0.336424	0.254481	0.273982	0.280182	0.297912	0.295982	0.10108	0.376414	0.118263	0.0359409	0.0993736	0.103265	0.119139	0.162415	0.0760762	0.129059	0.0978515	0.101323	0.107365	0.147131	0.11787	0.245876	0.0513001	0.172429	0.224982	0.114367	0.128993	0.175049	0.246786	0.0710277	0.194883	0.150018	0.119199	0.193818	0.150151	0.103163	0.0866949	0.146873	0.19029	0.119528	0.184107
0.314082	0.405803	0.494904	0.271322	0.39596	0.344293	0.248958	0.319648	0.233275	0.25447	0.259432	0.281541	0.272087	0.0817317	0.346096	0.102759	0.0361963	0.0886106	0.0884769	0.104354	0.149333	0.0665087	0.118023	0.0892782	0.0886816	0.0967513	0.138702	0.10081	0.220284	0.0486567	0.153994	0.206564	0.104015	0.126882	0.166107	0.232419	0.0610254	0.179393	0.138641	0.117022	0.18055	0.136582	0.100093	0.0823313	0.136294	0.170632	0.110893	0.175371
0.294241	0.39456	0.472151	0.255495	0.367833	0.319951	0.226995	0.302872	0.212069	0.234987	0.238682	0.264366	0.24849	0.0702703	0.317229	0.0916837	0.0364516	0.0782483	0.0750739	0.0907784	0.13625	0.0569412	0.106987	0.0807048	0.0767467	0.0861379	0.130273	0.0898673	0.198535	0.0460134	0.135559	0.189099	0.0938324	0.124771	0.157166	0.218491	0.0514018	0.163903	0.127265	0.114388	0.167281	0.123012	0.0970237	0.0779676	0.125714	0.150974	0.102424	0.166635
0.270522	0.383317	0.449398	0.239667	0.339148	0.295609	0.206822	0.284415	0.192555	0.215504	0.218011	0.244783	0.225787	0.0588089	0.288786	0.0814131	0.0376423	0.0679588	0.061671	0.0786803	0.124654	0.0490316	0.0950061	0.0728672	0.0737665	0.0775585	0.12238	0.0789245	0.177906	0.0428272	0.120838	0.171913	0.0862001	0.122401	0.147782	0.204643	0.0417782	0.15252	0.119439	0.111755	0.157291	0.110012	0.0942127	0.070953	0.119576	0.132184	0.0949155	0.157318
0.245252	0.360152	0.426646	0.216882	0.310463	0.255039	0.18665	0.262139	0.173717	0.195879	0.197371	0.2252	0.203084	0.0494492	0.260343	0.071872	0.0392072	0.0587041	0.0534163	0.0665823	0.116437	0.0416525	0.0827226	0.0653239	0.0707862	0.0736018	0.115703	0.0679817	0.157276	0.0384076	0.107603	0.154727	0.0828715	0.119442	0.137392	0.191121	0.0383917	0.142779	0.113033	0.107887	0.148612	0.0983084	0.0915052	0.0628781	0.115216	0.115367	0.0874069	0.14777
0.219981	0.314338	0.393248	0.193483	0.278221	0.201331	0.166477	0.239864	0.154879	0.175982	0.176731	0.205616	0.180382	0.0417908	0.233831	0.0651575	0.0412354	0.0534593	0.0456159	0.0605597	0.10822	0.0342735	0.0704392	0.0577806	0.0660711	0.0696451	0.109027	0.0592467	0.137101	0.033988	0.0943677	0.140234	0.079543	0.116483	0.127002	0.178866	0.0355556	0.133038	0.106627	0.10391	0.139933	0.0866043	0.0887977	0.0548032	0.110855	0.0985506	0.0794248	0.138222
0.198221	0.268524	0.358213	0.170126	0.241053	0.147623	0.148154	0.21722	0.13081	0.156085	0.156997	0.20334	0.152012	0.0341324	0.209992	0.058443	0.0445699	0.0482145	0.0385012	0.055405	0.0976377	0.0274815	0.0596171	0.0532452	0.0599983	0.0661795	0.104739	0.0508514	0.117554	0.0302605	0.082333	0.129471	0.0774803	0.112289	0.118292	0.16661	0.0325436	0.123463	0.102436	0.0996668	0.130007	0.0755563	0.0852932	0.0484601	0.10603	0.0819728	0.0678908	0.129614
0.177503	0.222709	0.323178	0.147041	0.203885	0.117427	0.129831	0.194117	0.10519	0.136188	0.137531	0.201063	0.123643	0.028984	0.186153	0.0526905	0.0479043	0.0444463	0.0357758	0.0500186	0.0840977	0.0210713	0.0497449	0.049601	0.0540136	0.0633277	0.103436	0.0424561	0.0980076	0.0273982	0.070654	0.118708	0.0754478	0.106551	0.111682	0.154875	0.0284059	0.113939	0.0989006	0.0937199	0.119713	0.0653284	0.0815525	0.0426301	0.101066	0.065694	0.0563568	0.121284
0.156784	0.207523	0.284111	0.123955	0.166654	0.0916387	0.111507	0.171014	0.0795708	0.11746	0.118066	0.198787	0.0952738	0.0243063	0.162473	0.0476814	0.0587977	0.041819	0.0330504	0.0440916	0.0705576	0.014661	0.0398726	0.0459568	0.0497471	0.060476	0.102133	0.0352237	0.0791392	0.024536	0.0589749	0.108263	0.0788708	0.100813	0.105072	0.143543	0.0242682	0.104414	0.0953656	0.087773	0.109418	0.0551004	0.0778118	0.0368002	0.0961033	0.0494152	0.0454506	0.112955
0.133563	0.202082	0.238997	0.0972359	0.128503	0.0672097	0.0901178	0.145986	0.0604184	0.0991044	0.0990198	0.170916	0.0758688	0.0195061	0.141112	0.0426722	0.0714696	0.0391917	0.0304045	0.0381645	0.0600237	0.0105302	0.0335831	0.043196	0.0454806	0.0580072	0.0953934	0.0297355	0.0701068	0.0228277	0.0544547	0.102423	0.0862218	0.0955397	0.0992533	0.13221	0.0215187	0.0977981	0.0933937	0.0826768	0.103881	0.0490986	0.0718272	0.0347587	0.0902516	0.0369446	0.0410318	0.106681
0.109824	0.19664	0.193882	0.0638077	0.0903513	0.0517505	0.0677067	0.119584	0.042604	0.0807487	0.0800607	0.134513	0.0594519	0.0138976	0.11975	0.0398519	0.0844982	0.0361105	0.0279054	0.0331648	0.0516368	0.00913473	0.0315928	0.0406179	0.0416218	0.0558121	0.0847695	0.0242474	0.0610744	0.0219438	0.0514156	0.0965842	0.0936363	0.0905974	0.0940003	0.121745	0.0213324	0.0917842	0.0917452	0.0791511	0.0993278	0.0461155	0.0653785	0.033501	0.0842159	0.0271942	0.036613	0.100832
0.0860859	0.186679	0.148768	0.0303794	0.0522	0.0362914	0.0452956	0.0931812	0.0247896	0.063206	0.0611016	0.0981105	0.0430351	0.00828906	0.0983886	0.037214	0.0981687	0.0329916	0.0254064	0.0285167	0.04325	0.00773929	0.0296025	0.0380397	0.0381151	0.053617	0.0741456	0.0187592	0.0520421	0.0210599	0.0483765	0.0907449	0.101329	0.0856551	0.0887473	0.111353	0.021146	0.0857703	0.0900967	0.0756253	0.0947749	0.0431324	0.0589297	0.0322434	0.0781803	0.0174438	0.0323128	0.0949835
0.061631	0.15502	0.110068	0.014886	0.0337173	0.0237716	0.0300421	0.0672203	0.0177448	0.0495657	0.0466802	0.0701605	0.0303289	0.00484621	0.078078	0.0349812	0.111839	0.0308869	0.0215171	0.0244189	0.03949	0.00658933	0.0273015	0.035452	0.0346449	0.0512557	0.0700803	0.0163706	0.0423253	0.0208037	0.0446058	0.0854228	0.109021	0.0832044	0.0858968	0.102134	0.0213288	0.0854302	0.0908505	0.0739702	0.0935284	0.0394092	0.0563281	0.0309961	0.0767513	0.0131746	0.0299093	0.0922757
0.0370837	0.123361	0.071826	0.0130573	0.0232809	0.0152935	0.0219464	0.0414293	0.0120896	0.0359255	0.0328443	0.0506633	0.0213334	0.00438117	0.0581972	0.0337797	0.132068	0.0313642	0.0165686	0.023439	0.0375096	0.00600398	0.0242858	0.032863	0.0326379	0.0488305	0.0685376	0.0142034	0.0323286	0.020789	0.0407407	0.0803123	0.129377	0.0817119	0.0839703	0.0959046	0.0217929	0.0858222	0.0919142	0.0737403	0.0927086	0.0354015	0.054223	0.0297502	0.0759168	0.0110136	0.0275058	0.0899731
0.0125363	0.0917024	0.0335841	0.0112285	0.0128445	0.00681539	0.0138507	0.0156383	0.00643442	0.0222853	0.0190084	0.0311661	0.0123379	0.00391613	0.0383165	0.0325782	0.152986	0.0318415	0.0116202	0.0224592	0.0355292	0.00541863	0.0212702	0.030274	0.0306309	0.0464053	0.066995	0.0120362	0.0223319	0.0207743	0.0368755	0.0752018	0.153085	0.0802194	0.0820438	0.0896749	0.022257	0.0862142	0.092978	0.0735104	0.0918888	0.0313937	0.0521179	0.0285043	0.0750823	0.00885255	0.025173	0.0876705

## Sheet: cross-step in the FP phase
0.0586245	0.0351244	0.0670115	0.0384163	0.0609701	0.0135071	0.051388	0.206863	0.0643584	0.0322854	0.0497204	0.0646799	0.0182473	0.121295	0.0404322	0.507313	0.0439836	0.0168507	0.0283653	0.0377851	0.00676671	0.0230332	0.0338435	0.0296158	0.0530652	0.0827231	0.0152861	0.0208723	0.0292117	0.0220228	0.0543317	0.0580372	0.039118	0.11858	0.0899464	0.0836164	0.0910498	0.0360481	0.0942321	0.116373	0.0734607	0.115171	0.0531442	0.0619025	0.0440332	0.0874576	0.0238499	0.0346593
0.0629074	0.0435939	0.0860139	0.0461035	0.0725797	0.0181652	0.0592116	0.206153	0.0805584	0.032773	0.0654876	0.0872959	0.0312159	0.152182	0.0427956	0.51822	0.0491765	0.0203122	0.0314083	0.0428606	0.00955349	0.0244742	0.0354242	0.0309964	0.0566681	0.0869036	0.0276116	0.0244963	0.0409164	0.0228451	0.057721	0.0620229	0.0518805	0.124137	0.0949047	0.0860562	0.0973126	0.0442453	0.0991425	0.125724	0.0768373	0.12658	0.0690068	0.0683405	0.0499506	0.0947667	0.0272309	0.0420816
0.0671903	0.0520634	0.105016	0.0537907	0.0841893	0.0228232	0.0670352	0.205442	0.0967584	0.0332606	0.0812548	0.109912	0.0441846	0.18307	0.0451591	0.529128	0.0543693	0.0237737	0.0344512	0.0479362	0.0123403	0.0259153	0.0370048	0.032377	0.060271	0.091084	0.0399371	0.0281202	0.052621	0.0236674	0.0611103	0.0660086	0.0646431	0.129693	0.099863	0.0884959	0.103575	0.0524425	0.104053	0.135075	0.0802138	0.137989	0.0848694	0.0747785	0.0558681	0.102076	0.0306119	0.0495039
0.0714731	0.0605329	0.124019	0.0619226	0.0957989	0.0274813	0.0748588	0.204732	0.112958	0.0353141	0.0970858	0.132528	0.0571532	0.213958	0.0475225	0.540035	0.0595622	0.0272351	0.0374941	0.0530117	0.0151271	0.0273563	0.0385854	0.0337575	0.0638738	0.0952645	0.0522625	0.0317442	0.0643257	0.0244896	0.0644996	0.0699943	0.0774056	0.135249	0.104821	0.0909357	0.109838	0.0606397	0.108963	0.144427	0.0835903	0.149779	0.100732	0.0812165	0.0617855	0.109385	0.0339929	0.0569263
0.0803441	0.0729129	0.141031	0.0773934	0.111369	0.0364149	0.0876677	0.171933	0.13075	0.0470761	0.113969	0.155144	0.0701719	0.242305	0.049886	0.550943	0.0647551	0.0306966	0.040537	0.0580872	0.023398	0.0287973	0.0401661	0.0351381	0.0674767	0.099445	0.0669336	0.0353681	0.0760304	0.0254088	0.0694603	0.0733516	0.0929696	0.142371	0.114104	0.0933754	0.117045	0.0734933	0.116837	0.154287	0.0883888	0.167857	0.119722	0.0892159	0.0726179	0.117808	0.0376134	0.0648817
0.095715	0.0865965	0.156301	0.0928642	0.136841	0.046112	0.103219	0.138162	0.15769	0.0588382	0.130853	0.186121	0.0833156	0.264302	0.0546314	0.56185	0.069948	0.0354889	0.0440586	0.0674025	0.039438	0.033227	0.0420603	0.038084	0.0720628	0.103625	0.0816756	0.0402691	0.0965876	0.026885	0.0752853	0.0763634	0.124642	0.158489	0.125765	0.0960993	0.126613	0.0871783	0.126341	0.164868	0.0944314	0.185934	0.138807	0.0977357	0.0835993	0.129018	0.0426109	0.0729324
0.111086	0.10028	0.171571	0.109741	0.162312	0.055809	0.11877	0.104391	0.18463	0.0727546	0.147465	0.217097	0.0964594	0.286299	0.0593768	0.572758	0.0761593	0.0420112	0.0482024	0.0767177	0.0554781	0.0394498	0.0439546	0.0430649	0.0768948	0.107934	0.0964177	0.0451701	0.117145	0.0283613	0.0811103	0.0793752	0.156314	0.174607	0.137426	0.0991926	0.136181	0.100863	0.135844	0.17545	0.100474	0.204885	0.157892	0.106255	0.0945806	0.140227	0.0476083	0.0809831
0.126457	0.119614	0.186934	0.137509	0.187784	0.0655754	0.137613	0.126272	0.21157	0.0922725	0.161974	0.248074	0.109603	0.308296	0.0641221	0.582017	0.0823705	0.0485335	0.0523463	0.0860329	0.0715182	0.0456727	0.0458488	0.0480459	0.0817267	0.112243	0.119156	0.050071	0.137702	0.0298375	0.0877741	0.0840402	0.187986	0.190724	0.149945	0.102286	0.145749	0.116544	0.147039	0.186031	0.107137	0.230604	0.183962	0.118426	0.108994	0.151436	0.0526057	0.0951383
0.151596	0.144599	0.203597	0.165278	0.217075	0.0753718	0.164507	0.151631	0.239135	0.11179	0.176484	0.279051	0.120122	0.334564	0.0688675	0.59077	0.0885818	0.0550559	0.0564901	0.0953481	0.0853771	0.0518955	0.0477431	0.0530268	0.0865586	0.116552	0.142394	0.054972	0.158259	0.0318003	0.0964886	0.0927463	0.218735	0.20739	0.164557	0.105379	0.157662	0.133093	0.162369	0.201793	0.12248	0.256322	0.210469	0.134248	0.123623	0.163588	0.0585444	0.111948
0.17877	0.169583	0.220259	0.193792	0.249231	0.0851683	0.1914	0.176991	0.268181	0.132407	0.190993	0.301924	0.128672	0.364035	0.0753586	0.599522	0.0947931	0.0615782	0.060634	0.108328	0.0987816	0.0587301	0.0529517	0.0580078	0.0930109	0.120861	0.165633	0.0654387	0.178221	0.0349184	0.105203	0.101452	0.247292	0.225357	0.17917	0.108472	0.171333	0.149642	0.177698	0.218633	0.137824	0.283541	0.236976	0.150071	0.138251	0.176446	0.0667186	0.128757
0.205944	0.193909	0.236922	0.225911	0.281387	0.102539	0.218293	0.201667	0.297227	0.15456	0.2055	0.324797	0.137222	0.393506	0.0818497	0.608274	0.101004	0.0683571	0.066141	0.121309	0.112186	0.0674001	0.0581603	0.0642094	0.100543	0.12517	0.188706	0.0759054	0.198182	0.0380366	0.113918	0.110159	0.27585	0.243324	0.193782	0.112842	0.185004	0.163632	0.193027	0.235474	0.153167	0.318007	0.267757	0.167298	0.164185	0.189304	0.0748927	0.147322
0.23432	0.216258	0.252006	0.25803	0.313543	0.126222	0.233658	0.226276	0.326273	0.176714	0.220008	0.347671	0.145771	0.422977	0.0883408	0.617027	0.112157	0.0751744	0.0718526	0.134289	0.127524	0.0760701	0.0633688	0.0705941	0.108076	0.131273	0.211764	0.086372	0.218144	0.0411548	0.131978	0.112828	0.304408	0.261291	0.213949	0.117404	0.198675	0.17549	0.21257	0.253385	0.17304	0.352473	0.298951	0.18874	0.191212	0.202162	0.0830669	0.16735
0.266475	0.238607	0.266039	0.289058	0.342321	0.149905	0.248229	0.250886	0.349655	0.193438	0.22675	0.370544	0.163682	0.455074	0.0948319	0.625779	0.12331	0.0819917	0.0775641	0.147269	0.148941	0.0847401	0.0685774	0.0769788	0.115609	0.137375	0.234822	0.0968387	0.238105	0.0455975	0.150682	0.11508	0.335723	0.280007	0.234499	0.121966	0.216133	0.187348	0.232403	0.27466	0.195932	0.387455	0.330145	0.210182	0.21824	0.225685	0.0942464	0.187378
0.298629	0.260956	0.280071	0.316408	0.370536	0.177123	0.262799	0.266136	0.365955	0.205819	0.207282	0.379854	0.183153	0.487608	0.105114	0.633174	0.134463	0.088809	0.0832757	0.158973	0.170358	0.09341	0.0741287	0.0833636	0.125926	0.143477	0.259664	0.109087	0.258126	0.0516957	0.169387	0.117333	0.370484	0.299659	0.255049	0.126527	0.234223	0.195238	0.252236	0.295934	0.218824	0.424178	0.349564	0.231624	0.247738	0.250986	0.109183	0.209464
0.330784	0.281395	0.292564	0.343758	0.398751	0.209781	0.277343	0.280139	0.382256	0.2182	0.187815	0.389165	0.202624	0.520143	0.115395	0.639362	0.145616	0.0974605	0.0898673	0.170676	0.191775	0.103476	0.0796799	0.0911865	0.140421	0.14958	0.284744	0.121336	0.278146	0.0577939	0.186116	0.122128	0.405245	0.31931	0.277616	0.131859	0.252312	0.197022	0.273246	0.317209	0.242609	0.460902	0.367412	0.265655	0.277565	0.276287	0.124119	0.234716
0.358348	0.301834	0.295055	0.368948	0.419067	0.242438	0.291868	0.294142	0.398556	0.230997	0.179157	0.398475	0.22205	0.553382	0.125677	0.645551	0.156769	0.110304	0.0984705	0.18238	0.217757	0.113742	0.0852311	0.102297	0.154916	0.155682	0.309823	0.133584	0.298167	0.0638921	0.201418	0.12876	0.440006	0.338962	0.30164	0.138952	0.271086	0.198807	0.295104	0.342943	0.272201	0.499159	0.38526	0.299687	0.307392	0.302174	0.139055	0.259968
0.383497	0.322273	0.297546	0.388738	0.391986	0.272596	0.306393	0.30719	0.402194	0.243977	0.197524	0.407786	0.241202	0.590852	0.135958	0.651739	0.170447	0.123148	0.107074	0.194084	0.246142	0.124007	0.0907823	0.113407	0.169411	0.162148	0.329635	0.145832	0.318187	0.0712647	0.216721	0.135392	0.472838	0.362803	0.325664	0.146045	0.293966	0.203267	0.316963	0.371025	0.301793	0.541253	0.419972	0.333718	0.334594	0.331577	0.158135	0.285564
0.408645	0.340851	0.300036	0.408528	0.364906	0.294941	0.320279	0.320074	0.397127	0.256957	0.215891	0.418292	0.260354	0.628323	0.149912	0.657927	0.184125	0.135992	0.115677	0.211202	0.274527	0.134273	0.0979352	0.124517	0.183601	0.168613	0.348539	0.159804	0.342234	0.0795133	0.232284	0.142528	0.504343	0.389524	0.350638	0.153138	0.316847	0.216087	0.34054	0.399106	0.331385	0.583347	0.457592	0.375615	0.361344	0.360981	0.180065	0.31223
0.433484	0.358807	0.306804	0.423327	0.337826	0.317285	0.331978	0.332958	0.39206	0.266923	0.231987	0.428797	0.279506	0.665793	0.163866	0.664115	0.197804	0.148836	0.12428	0.228321	0.30328	0.148159	0.105088	0.135627	0.196574	0.175078	0.367442	0.173777	0.366282	0.087762	0.248744	0.151396	0.535849	0.416244	0.378869	0.16023	0.339727	0.228906	0.370009	0.427141	0.362284	0.623741	0.495212	0.420134	0.388093	0.390384	0.201994	0.338897
0.454152	0.376764	0.31571	0.428559	0.34067	0.339531	0.343676	0.321475	0.386993	0.276285	0.243732	0.439303	0.300974	0.691584	0.177819	0.668736	0.211482	0.162779	0.13404	0.24544	0.337008	0.165667	0.112241	0.148595	0.209548	0.181544	0.383945	0.187749	0.390329	0.0960107	0.265204	0.160263	0.567354	0.442965	0.4071	0.17117	0.364018	0.242823	0.399477	0.454552	0.393838	0.660877	0.51931	0.464653	0.428294	0.422525	0.223924	0.367198
0.47482	0.393856	0.324616	0.433791	0.383414	0.360782	0.355375	0.304769	0.405467	0.285647	0.255477	0.449808	0.32553	0.701801	0.191773	0.669595	0.22516	0.17711	0.144209	0.262559	0.370736	0.183174	0.119394	0.162219	0.222521	0.188009	0.399934	0.201721	0.414376	0.106545	0.281664	0.16913	0.591419	0.46998	0.435332	0.183468	0.390188	0.267706	0.428946	0.481962	0.425392	0.698014	0.54051	0.510835	0.471378	0.458316	0.254294	0.411852
0.495488	0.410084	0.334453	0.439928	0.426159	0.382034	0.366662	0.288063	0.432181	0.292905	0.264707	0.472006	0.350086	0.712018	0.2048	0.670454	0.237726	0.191441	0.154377	0.280795	0.404463	0.200681	0.127965	0.175842	0.235494	0.194489	0.415922	0.219181	0.445165	0.117879	0.300285	0.180655	0.61288	0.497098	0.459429	0.195767	0.416358	0.29259	0.462215	0.509373	0.457549	0.733313	0.561711	0.558678	0.514461	0.494107	0.28762	0.456506
0.511641	0.426311	0.348017	0.447422	0.468903	0.403286	0.377889	0.324109	0.458894	0.300102	0.270162	0.494203	0.374643	0.722235	0.217828	0.671313	0.250293	0.205772	0.164545	0.299032	0.438526	0.21852	0.136536	0.189466	0.251896	0.200969	0.429951	0.236642	0.475953	0.129213	0.319227	0.192574	0.634341	0.524215	0.482914	0.208065	0.442528	0.317473	0.496048	0.540253	0.492118	0.765857	0.582916	0.606521	0.551811	0.529898	0.320945	0.501159
0.522957	0.439546	0.361582	0.454917	0.513954	0.403131	0.389116	0.37383	0.485607	0.30385	0.275617	0.516401	0.398977	0.730618	0.230856	0.672172	0.262859	0.220616	0.174906	0.317268	0.472949	0.238673	0.145107	0.203771	0.268298	0.207449	0.443472	0.254102	0.506742	0.140547	0.338169	0.204493	0.655801	0.551333	0.506398	0.220386	0.468189	0.332461	0.52988	0.574851	0.526687	0.798401	0.604122	0.652827	0.587674	0.567209	0.35427	0.523018
0.534273	0.4438	0.375146	0.465911	0.559929	0.401596	0.404334	0.423551	0.516718	0.280001	0.280971	0.538598	0.423222	0.738268	0.243884	0.673031	0.275425	0.237891	0.18618	0.335504	0.507371	0.258826	0.153677	0.221315	0.2847	0.213928	0.456993	0.271563	0.537531	0.152045	0.358533	0.21808	0.679442	0.573812	0.533465	0.232819	0.493646	0.346811	0.562663	0.609449	0.561255	0.83208	0.625329	0.69452	0.623537	0.605127	0.393297	0.543407
0.545589	0.448055	0.372326	0.48106	0.605903	0.40006	0.423293	0.447893	0.548378	0.256152	0.286206	0.531328	0.447467	0.745918	0.257209	0.673736	0.287991	0.255167	0.197454	0.353115	0.541793	0.27898	0.166694	0.238859	0.301101	0.220408	0.469414	0.289547	0.549386	0.163564	0.380229	0.233231	0.703354	0.595711	0.563888	0.245252	0.519103	0.361161	0.594462	0.644046	0.594205	0.867109	0.649589	0.736213	0.661473	0.643045	0.433036	0.563795
0.564282	0.452309	0.363548	0.49621	0.651877	0.427471	0.442252	0.464427	0.580038	0.24126	0.29144	0.524057	0.471713	0.753567	0.270534	0.671971	0.302478	0.272443	0.208728	0.370726	0.573221	0.299133	0.17971	0.256403	0.319204	0.226639	0.481497	0.307532	0.56124	0.175083	0.401925	0.248381	0.727267	0.61761	0.594312	0.257685	0.544561	0.378258	0.626261	0.675687	0.626565	0.902137	0.67479	0.777906	0.700047	0.680963	0.472775	0.58187
0.583826	0.462816	0.35477	0.507296	0.652231	0.462674	0.459056	0.48096	0.609732	0.253238	0.296065	0.516787	0.494421	0.760341	0.28386	0.670206	0.316964	0.289719	0.220002	0.388337	0.604304	0.323085	0.192726	0.273947	0.337732	0.232871	0.49358	0.325517	0.573095	0.18668	0.423768	0.263344	0.750946	0.639867	0.624383	0.270118	0.567909	0.396094	0.660068	0.706987	0.658926	0.940317	0.699991	0.824147	0.738622	0.724955	0.51266	0.599322
0.603369	0.473322	0.34839	0.514542	0.652585	0.497878	0.464654	0.484479	0.588318	0.265217	0.300114	0.509516	0.51713	0.767114	0.297185	0.668441	0.331451	0.307248	0.233729	0.405948	0.635386	0.348303	0.205742	0.291301	0.35626	0.239102	0.500551	0.343501	0.58495	0.200342	0.446372	0.277328	0.768547	0.67143	0.652616	0.287915	0.591257	0.413931	0.704313	0.738286	0.694931	0.981472	0.733131	0.870389	0.77999	0.768947	0.556329	0.616774
0.620083	0.483829	0.348607	0.521789	0.652939	0.514092	0.470252	0.483313	0.566904	0.27353	0.304163	0.511461	0.539838	0.773887	0.311323	0.666676	0.345938	0.32494	0.249032	0.429719	0.663846	0.373521	0.223847	0.308533	0.374788	0.245333	0.50568	0.359553	0.586245	0.214003	0.468976	0.291312	0.786148	0.702992	0.68085	0.30916	0.614606	0.43599	0.748558	0.767893	0.740959	1.02263	0.769128	0.916631	0.822364	0.812939	0.599998	0.640842
0.630509	0.493755	0.348824	0.529268	0.648105	0.519456	0.47585	0.482146	0.545489	0.276084	0.306287	0.513406	0.563382	0.783583	0.325461	0.664911	0.360424	0.342632	0.264336	0.453489	0.686476	0.398739	0.241952	0.325764	0.392241	0.251565	0.51081	0.375605	0.587541	0.227664	0.491579	0.305297	0.803749	0.734555	0.709084	0.330406	0.637376	0.460461	0.792803	0.793739	0.786988	1.05738	0.805125	0.967392	0.864739	0.857068	0.643667	0.66869
0.640934	0.503488	0.349041	0.53692	0.630304	0.524819	0.467733	0.473097	0.5289	0.278638	0.306966	0.515351	0.589016	0.800586	0.339599	0.663147	0.375262	0.360324	0.27964	0.47726	0.709106	0.422261	0.260057	0.342996	0.408977	0.258421	0.517106	0.391657	0.588837	0.241118	0.507568	0.320185	0.823433	0.763671	0.734467	0.351652	0.658702	0.484932	0.827977	0.819584	0.833017	1.08733	0.832593	1.01966	0.904435	0.901541	0.685962	0.696538
0.651359	0.513221	0.348556	0.544572	0.612503	0.529463	0.456325	0.460764	0.533543	0.281037	0.307645	0.517295	0.61465	0.817588	0.353737	0.661002	0.3901	0.378083	0.295113	0.50103	0.731736	0.442956	0.278161	0.36025	0.425713	0.265278	0.523888	0.407709	0.590132	0.25366	0.521969	0.33529	0.852283	0.782016	0.759167	0.372933	0.680028	0.510377	0.860974	0.84543	0.867196	1.11728	0.856506	1.07193	0.943015	0.946014	0.722212	0.723715
0.653819	0.51926	0.347896	0.548059	0.594702	0.533343	0.444917	0.448431	0.538187	0.283299	0.307861	0.504521	0.640284	0.83459	0.369815	0.658776	0.404938	0.397308	0.314315	0.522353	0.747679	0.463651	0.296563	0.378008	0.442449	0.272135	0.530669	0.421467	0.588979	0.266202	0.53637	0.350396	0.881132	0.800362	0.783866	0.395004	0.701353	0.536854	0.893971	0.872718	0.898413	1.13998	0.88042	1.11547	0.981595	0.990487	0.758462	0.750178
0.653243	0.521605	0.347236	0.549085	0.586442	0.537223	0.436326	0.419439	0.54283	0.285561	0.307803	0.491746	0.664752	0.853788	0.385892	0.65655	0.419776	0.416534	0.333518	0.543675	0.761073	0.484347	0.314964	0.395766	0.458987	0.278992	0.537889	0.435224	0.587825	0.278744	0.543879	0.366185	0.909982	0.818707	0.810332	0.417076	0.723379	0.563332	0.925506	0.900555	0.92963	1.1584	0.901075	1.15028	1.01388	1.02845	0.794711	0.776642
0.652667	0.52395	0.345911	0.550111	0.585339	0.528675	0.431156	0.382479	0.546295	0.28683	0.307745	0.478971	0.688344	0.874633	0.40197	0.654324	0.434614	0.43576	0.352721	0.564998	0.774467	0.505042	0.333365	0.413523	0.475228	0.285848	0.545317	0.448982	0.586672	0.292143	0.543018	0.382805	0.934608	0.842937	0.838942	0.439147	0.745928	0.588402	0.955263	0.928392	0.958791	1.17683	0.920172	1.18509	1.04316	1.06154	0.830307	0.803131
0.652568	0.525223	0.343254	0.548283	0.584236	0.49527	0.425986	0.345519	0.547404	0.287602	0.306562	0.466197	0.711937	0.895479	0.418047	0.652098	0.449082	0.454985	0.371924	0.586321	0.787355	0.526276	0.351767	0.431281	0.491469	0.292083	0.552746	0.462739	0.585518	0.307256	0.542158	0.399424	0.950787	0.878937	0.867552	0.461219	0.768478	0.610655	0.985021	0.955824	0.983842	1.19283	0.939268	1.21705	1.07244	1.09463	0.864595	0.829671
0.655452	0.523282	0.340598	0.545146	0.583132	0.461865	0.420824	0.330299	0.548512	0.288374	0.304864	0.446508	0.735529	0.916324	0.434666	0.649872	0.463549	0.473467	0.389333	0.604845	0.797078	0.547509	0.374559	0.449686	0.50771	0.298317	0.563839	0.481175	0.587498	0.322369	0.54155	0.41537	0.966966	0.914937	0.895484	0.48323	0.791028	0.632908	1.01452	0.980723	1.00889	1.20773	0.961179	1.24046	1.09799	1.12772	0.898884	0.856211
0.658335	0.52134	0.337942	0.54201	0.579362	0.440429	0.415734	0.326938	0.549621	0.286347	0.303165	0.426819	0.759554	0.941798	0.451286	0.647096	0.478017	0.491138	0.404785	0.62337	0.806801	0.568743	0.397352	0.468797	0.52308	0.304552	0.576931	0.499612	0.589478	0.337482	0.543304	0.425021	0.983145	0.950937	0.917087	0.505177	0.809441	0.654988	1.04157	1.00562	1.03394	1.22262	0.984625	1.26387	1.12152	1.15476	0.933172	0.883606
0.661218	0.519399	0.336509	0.538348	0.575148	0.472858	0.410644	0.323577	0.548311	0.283644	0.301342	0.40713	0.78365	0.968044	0.467905	0.643935	0.492485	0.50881	0.420237	0.641895	0.816524	0.589977	0.420145	0.487908	0.534969	0.310786	0.590022	0.518048	0.591458	0.35191	0.545057	0.434673	1.00421	0.975965	0.93869	0.527123	0.827164	0.676288	1.06863	1.03052	1.05434	1.23581	1.00807	1.28727	1.14506	1.18079	0.962058	0.914845
0.663038	0.514501	0.335264	0.534505	0.570934	0.505286	0.405553	0.319584	0.544396	0.280941	0.299476	0.387441	0.807747	0.99429	0.484524	0.640774	0.506953	0.526481	0.435689	0.66042	0.82419	0.609347	0.442937	0.507019	0.546857	0.317021	0.601293	0.536485	0.593437	0.365601	0.54681	0.444324	1.03052	0.989177	0.960293	0.54907	0.844887	0.697588	1.09568	1.05308	1.07403	1.24841	1.02937	1.30189	1.16386	1.20682	0.985126	0.946083
0.663994	0.509603	0.334019	0.530661	0.566056	0.536968	0.400509	0.315199	0.540482	0.278811	0.29761	0.386673	0.831473	1.01963	0.49592	0.637613	0.516333	0.544152	0.451141	0.674499	0.830185	0.627601	0.460046	0.526129	0.558746	0.322626	0.611436	0.546136	0.594616	0.379292	0.552979	0.453559	1.05684	1.00239	0.981505	0.571016	0.863348	0.718935	1.11797	1.07373	1.09371	1.26101	1.04935	1.3165	1.17974	1.23177	1.00819	0.976973
0.66495	0.504705	0.330902	0.52609	0.557192	0.544759	0.395481	0.310814	0.536567	0.276715	0.295149	0.385905	0.852971	1.0395	0.507316	0.634452	0.525712	0.559934	0.468267	0.688578	0.836179	0.645854	0.477154	0.539442	0.570634	0.328232	0.62158	0.555787	0.595795	0.392983	0.560683	0.462649	1.08316	1.0156	1.00258	0.594589	0.886238	0.741793	1.13859	1.09438	1.11233	1.27046	1.06933	1.33112	1.19561	1.25024	1.03126	0.996697
0.665906	0.500111	0.324975	0.521337	0.548329	0.55255	0.390453	0.304784	0.529959	0.274493	0.29254	0.385137	0.87447	1.05937	0.518712	0.631291	0.535092	0.575536	0.485553	0.702658	0.842174	0.664107	0.494262	0.552202	0.579634	0.333837	0.633083	0.565439	0.596974	0.403224	0.568387	0.47174	1.1088	1.04347	1.02366	0.618317	0.909127	0.764652	1.15922	1.11503	1.12935	1.27913	1.08628	1.34345	1.20934	1.26872	1.05292	1.01642
0.666179	0.495619	0.319049	0.516583	0.539465	0.56034	0.385756	0.297602	0.521766	0.270889	0.289931	0.38437	0.895968	1.07925	0.530108	0.627341	0.544472	0.591139	0.502838	0.716737	0.842529	0.680544	0.511371	0.564962	0.588634	0.339443	0.645539	0.57509	0.598153	0.411437	0.575446	0.480293	1.13405	1.07996	1.04259	0.642045	0.932017	0.78751	1.17859	1.13	1.14638	1.28779	1.10112	1.35503	1.22156	1.2872	1.07375	1.03615
0.666427	0.491127	0.313122	0.510566	0.530158	0.558182	0.381585	0.29042	0.513574	0.267285	0.28831	0.381265	0.914901	1.09632	0.541675	0.621943	0.553852	0.606741	0.520123	0.731468	0.842683	0.691529	0.530595	0.577723	0.597634	0.345048	0.657994	0.580774	0.604804	0.41965	0.581484	0.487995	1.15931	1.11645	1.05812	0.665772	0.951691	0.808249	1.19596	1.14477	1.1634	1.29094	1.11597	1.3666	1.23378	1.30138	1.09458	1.05363
0.666676	0.483951	0.309097	0.504339	0.520261	0.554651	0.377415	0.292002	0.505381	0.263339	0.286853	0.378161	0.930412	1.10966	0.553242	0.616545	0.558934	0.61964	0.536269	0.746198	0.842836	0.702515	0.54982	0.588371	0.606633	0.346525	0.669633	0.586458	0.611455	0.427863	0.587521	0.495697	1.18456	1.15294	1.07365	0.688741	0.967078	0.828697	1.21334	1.15953	1.17619	1.29318	1.1253	1.37509	1.24322	1.30985	1.11541	1.07081
0.666045	0.474092	0.305208	0.498111	0.510363	0.55112	0.373214	0.300503	0.496636	0.2582	0.285396	0.375057	0.945923	1.12301	0.564809	0.611147	0.564016	0.627469	0.550276	0.760929	0.8436	0.713501	0.569045	0.59506	0.611417	0.348001	0.680627	0.592141	0.618105	0.434926	0.593643	0.503236	1.21006	1.17207	1.08898	0.710287	0.982465	0.849145	1.2305	1.17185	1.18868	1.29541	1.13028	1.38051	1.25047	1.31831	1.12968	1.08799
0.663978	0.464234	0.301319	0.490013	0.500466	0.54514	0.368103	0.309004	0.487733	0.25306	0.281076	0.371953	0.961435	1.13635	0.576377	0.605749	0.569098	0.635297	0.564283	0.77566	0.845363	0.724487	0.588269	0.60175	0.615147	0.349478	0.691621	0.597825	0.624756	0.44166	0.60232	0.505874	1.23564	1.18624	1.09821	0.731833	0.997852	0.867503	1.24136	1.18018	1.20117	1.2912	1.13527	1.38593	1.25771	1.32678	1.14207	1.10083
0.66191	0.454509	0.297078	0.481738	0.490231	0.538242	0.362991	0.309811	0.478831	0.248762	0.276488	0.36843	0.972805	1.14309	0.582889	0.600351	0.57418	0.643126	0.57829	0.783693	0.847126	0.731798	0.598086	0.608439	0.618878	0.350954	0.703078	0.599377	0.62835	0.448395	0.610997	0.508512	1.26121	1.2004	1.10744	0.753379	1.01148	0.885078	1.25221	1.1885	1.21264	1.28639	1.13704	1.38876	1.25985	1.32834	1.15445	1.11204
0.659842	0.445185	0.292435	0.473464	0.479861	0.531344	0.35788	0.30378	0.469928	0.245951	0.271899	0.364908	0.982518	1.1472	0.589401	0.594824	0.579262	0.650955	0.592297	0.791727	0.848889	0.738583	0.607902	0.615128	0.622608	0.352431	0.714946	0.600928	0.631944	0.455129	0.619674	0.51115	1.28679	1.21457	1.11667	0.774925	1.02441	0.902653	1.26307	1.19683	1.22297	1.28158	1.13594	1.38382	1.25744	1.32713	1.16684	1.12324
0.656456	0.435861	0.287792	0.463016	0.469491	0.523189	0.352324	0.297749	0.459745	0.243141	0.257514	0.361385	0.992231	1.15131	0.595913	0.588328	0.57624	0.651545	0.600229	0.79976	0.854724	0.745368	0.617719	0.617125	0.624547	0.349763	0.726815	0.60248	0.635538	0.460057	0.625306	0.514814	1.29707	1.22377	1.12248	0.801322	1.03733	0.917784	1.26843	1.20312	1.2333	1.27178	1.13485	1.37889	1.25502	1.32593	1.17519	1.13351
0.652726	0.426538	0.283149	0.452503	0.459121	0.514107	0.346555	0.290808	0.449458	0.237998	0.24284	0.357863	1.00194	1.15542	0.602425	0.581833	0.573219	0.650123	0.606474	0.807793	0.861622	0.752154	0.627535	0.617819	0.625292	0.347094	0.737744	0.604032	0.639132	0.464841	0.629489	0.518968	1.30613	1.23258	1.12665	0.829067	1.05026	0.931114	1.27116	1.20889	1.24362	1.26183	1.13179	1.37396	1.24737	1.32473	1.18321	1.14309
0.648996	0.414162	0.274749	0.441965	0.447296	0.505026	0.340786	0.282959	0.439172	0.230521	0.229221	0.349947	1.00533	1.15364	0.605924	0.575337	0.570198	0.648702	0.612718	0.812151	0.868519	0.755752	0.631968	0.618512	0.626038	0.344426	0.747733	0.60579	0.64536	0.469624	0.633671	0.523121	1.31519	1.24139	1.13082	0.856812	1.0604	0.944444	1.27389	1.21465	1.24802	1.25193	1.12677	1.36214	1.23446	1.31436	1.19123	1.15267
0.645105	0.401785	0.266349	0.430563	0.435472	0.495138	0.33428	0.275109	0.428887	0.223045	0.251476	0.342031	1.00872	1.15187	0.609423	0.568841	0.567177	0.647281	0.618963	0.81651	0.873074	0.756164	0.636402	0.619205	0.626784	0.341758	0.757723	0.607548	0.651589	0.474323	0.639366	0.525328	1.32261	1.25021	1.13333	0.884556	1.07054	0.9545	1.27415	1.21975	1.25242	1.24361	1.12174	1.35033	1.22156	1.304	1.19849	1.15752
0.640599	0.389409	0.257949	0.419161	0.423647	0.484155	0.326223	0.268032	0.418619	0.217434	0.27373	0.334115	1.01211	1.1501	0.612922	0.562346	0.564156	0.645014	0.624032	0.820868	0.868649	0.756575	0.640835	0.618477	0.626691	0.33909	0.764265	0.609306	0.657817	0.477957	0.648238	0.523448	1.30966	1.25929	1.13236	0.910836	1.08068	0.960114	1.26921	1.22228	1.25682	1.2353	1.11293	1.33851	1.20463	1.29363	1.19622	1.15597
0.636093	0.377296	0.250197	0.407728	0.411151	0.473172	0.318167	0.261825	0.408351	0.212876	0.294242	0.326199	1.01242	1.14698	0.616421	0.55585	0.557322	0.639703	0.624869	0.825226	0.864223	0.756987	0.645268	0.612632	0.62534	0.336046	0.76693	0.611064	0.664046	0.481591	0.657109	0.521568	1.29672	1.26838	1.13138	0.931842	1.09106	0.965729	1.26427	1.22481	1.25847	1.22563	1.09985	1.32538	1.18318	1.28044	1.19395	1.15442
0.631587	0.365269	0.243012	0.395966	0.396973	0.462387	0.31011	0.255617	0.398083	0.208319	0.296157	0.319829	1.00505	1.14052	0.611964	0.543321	0.550489	0.634392	0.625706	0.823581	0.859798	0.756697	0.646725	0.606787	0.62399	0.333003	0.769595	0.610378	0.662764	0.485225	0.66598	0.519688	1.28377	1.27746	1.13041	0.952848	1.10203	0.971363	1.25933	1.22734	1.25772	1.20157	1.08677	1.31182	1.16172	1.26021	1.19168	1.15148
0.625762	0.353243	0.235827	0.384204	0.382795	0.452131	0.30475	0.249575	0.382675	0.203328	0.298072	0.31346	0.997668	1.13405	0.607507	0.529987	0.543655	0.629081	0.626543	0.821937	0.855155	0.751496	0.648182	0.600942	0.622639	0.32996	0.772115	0.609692	0.661483	0.488235	0.67115	0.520349	1.2693	1.28028	1.12457	0.973854	1.11299	0.977052	1.2516	1.22607	1.25697	1.17751	1.07131	1.29826	1.13289	1.23997	1.1877	1.14486
0.61913	0.338356	0.228654	0.37268	0.368617	0.441876	0.29948	0.243742	0.349276	0.198213	0.298983	0.30709	0.990291	1.12758	0.60305	0.516653	0.536822	0.62377	0.62738	0.820292	0.850379	0.746295	0.649639	0.595096	0.620323	0.326917	0.774451	0.609006	0.660201	0.489064	0.676197	0.521095	1.24954	1.2612	1.11857	0.994861	1.12396	0.982742	1.24377	1.22246	1.25611	1.15301	1.05283	1.27954	1.0947	1.21974	1.1777	1.13823
0.612498	0.320609	0.221652	0.362581	0.353508	0.431323	0.29421	0.237909	0.315878	0.193097	0.293871	0.30072	0.977728	1.11517	0.598593	0.503319	0.529988	0.618019	0.62541	0.818647	0.845603	0.741095	0.651096	0.588536	0.614147	0.323874	0.776787	0.608319	0.65892	0.489892	0.681244	0.52184	1.22978	1.24211	1.11257	1.01207	1.13342	0.987649	1.23594	1.21886	1.25382	1.12582	1.03435	1.25565	1.05652	1.19495	1.16771	1.13138
0.605778	0.302862	0.21465	0.352483	0.337699	0.418619	0.287831	0.231539	0.28248	0.188513	0.288759	0.292963	0.961275	1.09829	0.595444	0.489985	0.517788	0.612034	0.621943	0.812295	0.840718	0.735894	0.642973	0.581595	0.607971	0.317932	0.778106	0.60414	0.651813	0.490721	0.682052	0.522597	1.21001	1.22303	1.09644	1.02726	1.14176	0.986885	1.22015	1.21507	1.25153	1.09864	1.01536	1.23176	1.01793	1.16675	1.15772	1.12287
0.596585	0.287146	0.207648	0.34183	0.32189	0.405914	0.280753	0.224403	0.260125	0.183978	0.283534	0.285206	0.944823	1.08142	0.592294	0.476651	0.505588	0.606048	0.618477	0.805942	0.832765	0.728957	0.634849	0.574654	0.601795	0.31199	0.777973	0.59996	0.644706	0.489515	0.680185	0.523362	1.18896	1.20768	1.07393	1.04245	1.1501	0.986121	1.19934	1.20603	1.24924	1.06912	0.995654	1.20463	0.978756	1.13855	1.14731	1.11435
0.587393	0.277525	0.200263	0.328959	0.306081	0.39321	0.273675	0.217267	0.256547	0.179317	0.277859	0.277449	0.928371	1.06454	0.589144	0.464311	0.493388	0.600063	0.61501	0.79959	0.824812	0.721441	0.626725	0.567712	0.595618	0.306048	0.77784	0.59578	0.637599	0.48485	0.678317	0.524127	1.16572	1.19869	1.05142	1.05764	1.15843	0.985357	1.17854	1.19699	1.23836	1.03024	0.975947	1.16774	0.939581	1.11035	1.13622	1.10584
0.578201	0.267903	0.192622	0.316087	0.293223	0.376962	0.267011	0.212938	0.252968	0.172527	0.272184	0.269692	0.909885	1.04395	0.585994	0.452514	0.481188	0.593702	0.610962	0.793237	0.816859	0.713924	0.618601	0.56029	0.586004	0.300106	0.775199	0.591601	0.630492	0.480185	0.674697	0.524349	1.14249	1.18971	1.02857	1.07266	1.16328	0.982101	1.15766	1.18794	1.22177	0.991364	0.956098	1.13086	0.894934	1.07015	1.12512	1.08849
0.569002	0.258282	0.184981	0.303877	0.280857	0.360604	0.26154	0.213141	0.249389	0.165737	0.266269	0.26129	0.891061	1.02273	0.575492	0.440717	0.468988	0.583395	0.600805	0.776642	0.807194	0.706408	0.60993	0.547813	0.57639	0.294164	0.76851	0.580989	0.620677	0.475519	0.666042	0.523012	1.11925	1.18072	1.00479	1.0859	1.16755	0.978767	1.13657	1.17298	1.20517	0.948952	0.93602	1.09398	0.84145	1.02795	1.11402	1.07086
0.559793	0.246348	0.177386	0.293581	0.26849	0.344245	0.256068	0.213344	0.242471	0.15938	0.25966	0.252887	0.872237	1.00152	0.564989	0.428919	0.456777	0.573088	0.590648	0.760047	0.795422	0.69617	0.60126	0.535336	0.566775	0.286297	0.761821	0.570377	0.610861	0.469078	0.657388	0.521675	1.09252	1.16948	0.981009	1.09913	1.17181	0.975433	1.11549	1.15074	1.18822	0.896331	0.915941	1.04601	0.787966	0.985748	1.09814	1.05322
0.550585	0.234413	0.170089	0.283284	0.256395	0.329291	0.250597	0.213417	0.232454	0.154819	0.253051	0.244485	0.853025	0.980571	0.554486	0.417122	0.444566	0.562781	0.580491	0.743452	0.78365	0.681397	0.592589	0.52286	0.557161	0.278429	0.752502	0.559765	0.601046	0.460988	0.648733	0.520337	1.06255	1.15615	0.957227	1.11237	1.17603	0.967208	1.09441	1.12849	1.16894	0.84371	0.889287	0.99805	0.732075	0.942155	1.07782	1.03298
0.541376	0.222479	0.162791	0.271832	0.245922	0.31465	0.242459	0.213252	0.222436	0.150259	0.240716	0.236082	0.83148	0.961237	0.543984	0.405325	0.432355	0.552474	0.570334	0.726857	0.771878	0.666623	0.583918	0.510383	0.545726	0.270562	0.738359	0.549154	0.59123	0.452898	0.639038	0.514597	1.03257	1.14282	0.926281	1.12561	1.17997	0.957897	1.06246	1.10625	1.14966	0.787401	0.850579	0.950087	0.67177	0.89021	1.05749	1.01216
0.532948	0.212235	0.155494	0.257859	0.235449	0.300009	0.234036	0.213087	0.212418	0.14576	0.215891	0.229841	0.809936	0.941903	0.530973	0.392061	0.420144	0.540774	0.55815	0.709802	0.756251	0.651849	0.568055	0.496656	0.533837	0.262695	0.724217	0.538554	0.573679	0.444808	0.629231	0.508384	1.0026	1.12949	0.894567	1.13805	1.1839	0.948585	1.02935	1.08313	1.13039	0.723045	0.81187	0.896802	0.611465	0.838265	1.03716	0.991343
0.524645	0.202553	0.148609	0.243886	0.224977	0.287148	0.225613	0.209988	0.204425	0.141385	0.191066	0.223599	0.788392	0.922569	0.517962	0.376702	0.407933	0.527797	0.544109	0.692748	0.740007	0.637075	0.552193	0.481782	0.521947	0.254828	0.710887	0.527955	0.556127	0.435619	0.619425	0.502171	0.968204	1.10424	0.862852	1.14978	1.18783	0.928166	0.996244	1.05988	1.10586	0.65869	0.768957	0.841745	0.55108	0.786319	1.01223	0.965804
0.516342	0.192872	0.141931	0.230125	0.214759	0.275177	0.218627	0.200751	0.197445	0.13701	0.173625	0.217358	0.765857	0.901589	0.504951	0.361342	0.390296	0.51482	0.530068	0.675694	0.723763	0.621353	0.536331	0.466908	0.510058	0.246183	0.699257	0.517356	0.538576	0.425881	0.605953	0.494926	0.931596	1.07303	0.82659	1.1615	1.19099	0.902194	0.959279	1.03662	1.07871	0.596146	0.717251	0.786687	0.490524	0.731369	0.984991	0.937904
0.506695	0.181797	0.135253	0.216722	0.204883	0.263206	0.212824	0.191514	0.190465	0.131314	0.16868	0.211117	0.742004	0.878414	0.491941	0.345983	0.372659	0.501843	0.516026	0.658639	0.705622	0.605632	0.520468	0.452035	0.492718	0.237539	0.687627	0.506757	0.521024	0.416143	0.589463	0.48683	0.894987	1.04182	0.786583	1.17322	1.19312	0.876221	0.919137	1.01031	1.05156	0.536668	0.665545	0.725526	0.429969	0.672413	0.957753	0.910004
0.493519	0.169327	0.129445	0.203319	0.195006	0.251235	0.207021	0.182902	0.183484	0.124142	0.163735	0.203651	0.71815	0.85524	0.473853	0.330623	0.355022	0.488866	0.501985	0.640312	0.682499	0.58991	0.500143	0.437161	0.471744	0.228894	0.674772	0.49148	0.502999	0.406405	0.572972	0.478734	0.858379	1.01061	0.746576	1.18495	1.19524	0.853859	0.878995	0.975967	1.02299	0.47719	0.612602	0.658263	0.371033	0.613456	0.930515	0.883985
0.480342	0.156857	0.127117	0.190303	0.18513	0.239263	0.201407	0.17579	0.175464	0.11697	0.158374	0.196186	0.694296	0.832065	0.455764	0.315264	0.337385	0.471497	0.481832	0.621984	0.659376	0.574189	0.479817	0.419146	0.450771	0.220249	0.658977	0.476202	0.484974	0.396029	0.556677	0.470011	0.822798	0.975581	0.705392	1.19282	1.19736	0.834895	0.836732	0.941622	0.988743	0.417483	0.556691	0.590999	0.315985	0.5545	0.902945	0.859735
0.467166	0.145137	0.124789	0.177805	0.173255	0.227292	0.196578	0.168677	0.167208	0.111749	0.152457	0.188721	0.667346	0.811222	0.437676	0.30052	0.319748	0.453928	0.461401	0.603656	0.636254	0.551531	0.459491	0.400987	0.429797	0.211605	0.643182	0.460925	0.466949	0.385508	0.541195	0.458675	0.787451	0.939691	0.659306	1.20052	1.19981	0.81593	0.785635	0.907277	0.9545	0.357471	0.500779	0.525649	0.260937	0.501936	0.8753	0.835485
0.452907	0.135665	0.122462	0.165307	0.160581	0.215432	0.191749	0.161051	0.158951	0.10777	0.14654	0.181255	0.639156	0.791312	0.419588	0.288646	0.30592	0.43636	0.44097	0.585328	0.612907	0.524713	0.439166	0.382829	0.409704	0.199677	0.626348	0.445648	0.448924	0.374987	0.525713	0.447338	0.752104	0.9038	0.613221	1.20821	1.20239	0.795642	0.734538	0.866328	0.920257	0.297458	0.444533	0.466037	0.207849	0.451929	0.847655	0.804441
0.438161	0.126194	0.119663	0.154059	0.147906	0.203766	0.18692	0.152001	0.150694	0.10379	0.140636	0.173002	0.610967	0.771401	0.401693	0.276773	0.292091	0.418791	0.420539	0.557536	0.589458	0.497894	0.416197	0.36467	0.390932	0.187749	0.606624	0.428069	0.424552	0.364465	0.51023	0.436002	0.716757	0.86791	0.567136	1.21591	1.20496	0.773035	0.68344	0.822405	0.875956	0.243821	0.387356	0.406425	0.160207	0.401922	0.82001	0.761507
0.423415	0.116722	0.116693	0.144136	0.135232	0.192099	0.180605	0.14295	0.141806	0.0996488	0.134746	0.164748	0.582777	0.751491	0.383799	0.2649	0.278263	0.400187	0.399728	0.529744	0.56601	0.471075	0.393229	0.346667	0.372159	0.175821	0.586901	0.410489	0.40018	0.349994	0.489723	0.418486	0.691097	0.833199	0.516525	1.22246	1.20754	0.750429	0.630251	0.778483	0.827996	0.196933	0.330178	0.346813	0.112565	0.351915	0.777546	0.718573
0.408217	0.109889	0.113724	0.134212	0.125942	0.180987	0.174004	0.133849	0.132893	0.0954531	0.128856	0.156495	0.552436	0.721244	0.365904	0.253026	0.264435	0.379972	0.378325	0.501952	0.541703	0.445033	0.370261	0.328906	0.353387	0.163893	0.566788	0.39291	0.375808	0.335371	0.46825	0.399781	0.665809	0.798534	0.465043	1.22723	1.20165	0.727731	0.57666	0.734413	0.780037	0.150046	0.274204	0.293244	0.0722843	0.301506	0.734512	0.674793
0.389099	0.103055	0.110963	0.123783	0.116652	0.171932	0.167403	0.124586	0.123979	0.0912574	0.123651	0.148242	0.522095	0.690997	0.348009	0.241153	0.250606	0.359756	0.356922	0.47416	0.509944	0.421321	0.347293	0.311145	0.334426	0.151965	0.545409	0.37533	0.351437	0.320748	0.446777	0.381077	0.640522	0.763868	0.413562	1.232	1.19577	0.704692	0.523068	0.689063	0.731793	0.112634	0.222141	0.239675	0.0559278	0.251098	0.691478	0.627873
0.369981	0.0962219	0.108775	0.112929	0.107362	0.162878	0.161178	0.115323	0.115169	0.0869014	0.119024	0.13927	0.491754	0.66075	0.326969	0.22928	0.237018	0.339541	0.335519	0.448069	0.478186	0.39761	0.326886	0.293383	0.31471	0.140549	0.52403	0.352453	0.328988	0.305502	0.422145	0.361636	0.616059	0.731161	0.369253	1.23677	1.18989	0.681652	0.473532	0.643713	0.682769	0.0832012	0.170077	0.186106	0.0395714	0.200689	0.648156	0.580953
0.350863	0.0894798	0.106588	0.102074	0.099071	0.15381	0.155352	0.106574	0.107175	0.0825254	0.114396	0.130299	0.460288	0.628312	0.305929	0.216247	0.223429	0.319326	0.314116	0.421979	0.446428	0.373898	0.30648	0.275622	0.294994	0.129134	0.501296	0.329577	0.306539	0.285283	0.394142	0.341411	0.59819	0.714124	0.332596	1.24154	1.1832	0.657881	0.428322	0.598363	0.633744	0.0537688	0.122503	0.145262	0.025974	0.156487	0.602534	0.533954
0.334522	0.0827681	0.1044	0.0923313	0.0932754	0.144534	0.149527	0.0998078	0.0991816	0.0781224	0.108168	0.121328	0.42601	0.590396	0.284889	0.203141	0.20984	0.300873	0.295457	0.395888	0.416769	0.350187	0.286073	0.257744	0.275278	0.117719	0.473336	0.3067	0.28409	0.265063	0.36614	0.321187	0.580321	0.697086	0.295939	1.24412	1.17451	0.622771	0.383111	0.551636	0.584719	0.0373025	0.0922482	0.108661	0.0230184	0.127797	0.556911	0.485725
0.320773	0.0760564	0.0991816	0.0833288	0.0874798	0.135259	0.143749	0.0930411	0.0911881	0.0727776	0.100872	0.112357	0.391732	0.55248	0.26385	0.190035	0.196252	0.282792	0.277375	0.369798	0.389071	0.329641	0.265666	0.239841	0.255562	0.106303	0.445375	0.283824	0.261641	0.244843	0.338535	0.301059	0.562453	0.680049	0.258755	1.24625	1.16582	0.587662	0.337523	0.503624	0.537512	0.0294803	0.0619931	0.072059	0.0200628	0.0991081	0.511288	0.437497
0.307024	0.0690232	0.0932051	0.0743264	0.0816843	0.125983	0.138291	0.08627	0.083954	0.0674328	0.0935763	0.10664	0.357454	0.514563	0.244411	0.176929	0.182663	0.26471	0.259294	0.338789	0.361372	0.309548	0.244871	0.221938	0.234223	0.094888	0.417061	0.262593	0.236483	0.225216	0.31361	0.281583	0.539827	0.655246	0.218008	1.24837	1.15713	0.552552	0.289387	0.455612	0.490761	0.021658	0.03559	0.04776	0.0174873	0.0704189	0.46755	0.389269
0.293274	0.0616686	0.0872287	0.0676035	0.0743661	0.116711	0.132834	0.0794779	0.0788898	0.0628497	0.0869563	0.100923	0.32289	0.475575	0.224972	0.163823	0.171627	0.246628	0.241212	0.30778	0.333673	0.289454	0.224077	0.204035	0.212883	0.0871589	0.387096	0.241362	0.211326	0.207282	0.288686	0.262108	0.503612	0.608256	0.177262	1.2505	1.1483	0.515788	0.241252	0.4076	0.444009	0.0185447	0.0271629	0.0357636	0.0166852	0.0518475	0.429194	0.339165
0.277104	0.0543139	0.0819382	0.0620699	0.0659061	0.107438	0.127376	0.0726859	0.0738256	0.0620753	0.0806889	0.0952055	0.288111	0.435784	0.205533	0.150717	0.16059	0.229159	0.223094	0.276771	0.306327	0.26936	0.203282	0.187143	0.191544	0.0794298	0.357131	0.220131	0.186168	0.189347	0.263761	0.242633	0.467396	0.561267	0.136515	1.25168	1.13938	0.47886	0.193116	0.364659	0.397943	0.0178883	0.0187357	0.0237673	0.0158831	0.0408646	0.390838	0.288875
0.260755	0.0478336	0.0780197	0.0565363	0.0574461	0.0981662	0.120865	0.0663079	0.0687614	0.061301	0.0744214	0.0894884	0.253332	0.395992	0.186094	0.13856	0.149554	0.213427	0.204872	0.245762	0.279008	0.249014	0.182487	0.173116	0.170204	0.0717007	0.32748	0.1989	0.16101	0.171412	0.238802	0.222425	0.431181	0.514278	0.108518	1.2502	1.13045	0.441931	0.155749	0.322092	0.353248	0.0172318	0.0115188	0.0139212	0.0151092	0.0298816	0.352482	0.238584
0.244406	0.0439765	0.0741013	0.0512911	0.048986	0.0874938	0.114047	0.0623314	0.0639656	0.0590151	0.0703786	0.0816554	0.218554	0.356201	0.174051	0.126799	0.138517	0.197694	0.186651	0.220284	0.251688	0.228415	0.166461	0.159088	0.152437	0.0639716	0.29965	0.179451	0.14675	0.154958	0.213832	0.202002	0.395656	0.465578	0.0842408	1.24871	1.12153	0.400345	0.121524	0.279526	0.308553	0.0165964	0.0113207	0.010526	0.0144995	0.0188986	0.312771	0.194796
0.227059	0.0401194	0.0701828	0.0461612	0.0443798	0.0763734	0.10723	0.0583549	0.05956	0.0532941	0.0672256	0.0738223	0.19194	0.320258	0.162008	0.115037	0.127481	0.181961	0.168429	0.194805	0.225817	0.207817	0.150434	0.145061	0.135563	0.0562425	0.271819	0.160002	0.132489	0.140656	0.188862	0.18158	0.361135	0.414391	0.0599632	1.24723	1.10828	0.357269	0.0872978	0.238137	0.263858	0.0159693	0.0111226	0.00713088	0.0138898	0.0141926	0.27109	0.153088
0.207816	0.0362622	0.0680067	0.0410314	0.0404159	0.065253	0.0998073	0.0544865	0.0551545	0.0475731	0.0640726	0.0659893	0.166687	0.284957	0.149964	0.103275	0.117611	0.166229	0.150208	0.169326	0.202695	0.187218	0.134408	0.131034	0.118688	0.0496627	0.244163	0.140553	0.118228	0.126354	0.166049	0.162835	0.326614	0.363205	0.0428139	1.24574	1.09431	0.314193	0.0621379	0.198986	0.219637	0.0153422	0.010826	0.00373573	0.0131834	0.0105327	0.229408	0.11138
0.188572	0.0297712	0.0660987	0.035516	0.0364519	0.057582	0.0915479	0.0514287	0.0507489	0.044588	0.0619442	0.0581563	0.141433	0.249656	0.137921	0.0915138	0.107741	0.151586	0.13422	0.143848	0.179573	0.167007	0.118381	0.116533	0.101814	0.0430828	0.217818	0.121104	0.103968	0.112053	0.146223	0.146414	0.292093	0.312018	0.0355347	1.23943	1.08034	0.270088	0.0495307	0.159835	0.175489	0.0151989	0.00979095	0.00650933	0.0117521	0.00687279	0.187726	0.0832002
0.169329	0.0232801	0.0641907	0.0298865	0.0327447	0.0521531	0.0832885	0.0483709	0.0467351	0.0450228	0.0601193	0.0523728	0.117425	0.21508	0.119124	0.0797522	0.0978711	0.13742	0.11921	0.125943	0.156451	0.149509	0.103967	0.101825	0.0881856	0.036503	0.191472	0.108898	0.0906558	0.0977497	0.126396	0.129992	0.260363	0.271076	0.0282555	1.23102	1.06533	0.225312	0.0369235	0.120683	0.13134	0.0151989	0.0087559	0.00928292	0.0103209	0.00373573	0.154143	0.0638132
0.146259	0.0167891	0.0620018	0.0242569	0.0305782	0.0467242	0.0752816	0.0452995	0.0430346	0.0454576	0.0582944	0.0465893	0.100882	0.184853	0.100326	0.0684558	0.0880012	0.123253	0.104199	0.108038	0.134289	0.132012	0.0895528	0.0871173	0.0767215	0.0299232	0.164999	0.0966917	0.0773439	0.083446	0.106971	0.11356	0.230867	0.238329	0.0213142	1.22261	1.04411	0.180537	0.0248429	0.0962012	0.0969039	0.0151989	0.00786472	0.0120565	0.00901591	0.00373573	0.127037	0.0444263
0.12197	0.0144164	0.0593918	0.0223764	0.0284116	0.0408104	0.0709371	0.0420881	0.0393342	0.0442979	0.0578529	0.0408058	0.0843391	0.154626	0.0815286	0.0576828	0.0781313	0.109087	0.0891889	0.0901336	0.112431	0.114515	0.0751386	0.0724093	0.0652573	0.0233433	0.137215	0.0844853	0.0640321	0.0691422	0.0933563	0.0969729	0.20137	0.205583	0.0192727	1.21419	1.02289	0.141103	0.0203975	0.0763863	0.0770353	0.0148483	0.00846017	0.0116104	0.00901591	0.00373573	0.0999322	0.0322768
0.0976823	0.0134164	0.0567818	0.0212716	0.026245	0.0343147	0.0665927	0.0388766	0.0356337	0.0419992	0.0576975	0.0350224	0.0677963	0.124399	0.0627311	0.0469097	0.0671617	0.0949058	0.0745577	0.0722289	0.0905739	0.0970174	0.0607243	0.0582976	0.0537932	0.0218271	0.10943	0.0722789	0.0507203	0.0548384	0.0797419	0.080386	0.171874	0.172837	0.0172312	1.20482	1.00167	0.10808	0.0159522	0.0565715	0.0571668	0.0144251	0.00905562	0.0100911	0.00901591	0.00373573	0.0728271	0.0288124
0.0749496	0.0124164	0.0541718	0.0201668	0.0247473	0.0278191	0.0622482	0.0357173	0.0354316	0.0397006	0.0575422	0.0292773	0.0539524	0.0968835	0.0506863	0.0361367	0.0561921	0.0806239	0.0624535	0.0571889	0.0693609	0.0797677	0.0471314	0.0481604	0.0432937	0.0203109	0.0821896	0.0600715	0.0389931	0.0437838	0.0661275	0.0637991	0.14171	0.141289	0.0151897	1.18907	0.977943	0.075057	0.0115068	0.0385958	0.0372983	0.014002	0.00961605	0.00857183	0.00902756	0.00373573	0.0557766	0.0253479
0.0596833	0.0116622	0.0526573	0.0205635	0.0241414	0.0231329	0.0554743	0.0333927	0.0367025	0.0340093	0.0562009	0.0235323	0.0437067	0.0729824	0.0386415	0.0253637	0.0452225	0.066342	0.0503493	0.0421489	0.0512409	0.0626006	0.0335384	0.0380232	0.034241	0.0187947	0.0636651	0.0478641	0.0272659	0.0340973	0.051708	0.0493285	0.111266	0.110247	0.0145879	1.17331	0.950879	0.0487631	0.0110068	0.0294482	0.0296038	0.0126482	0.00961605	0.00771985	0.00922567	0.00373573	0.0429597	0.0216527
0.0444169	0.0111538	0.051221	0.0211539	0.0235355	0.0226082	0.0477065	0.0310681	0.0379734	0.0270131	0.0547066	0.0177873	0.0334611	0.0490813	0.0265966	0.0145907	0.0342529	0.0520601	0.0382452	0.0271088	0.0331209	0.0454335	0.0199455	0.027886	0.0251884	0.0172785	0.0451406	0.0356568	0.0155387	0.0244108	0.0369592	0.0357236	0.0808212	0.0792054	0.014575	1.15756	0.923814	0.0379465	0.0121209	0.0203005	0.0227789	0.0111742	0.00961605	0.00753519	0.00942377	0.00373573	0.0301429	0.0174271
0.0291505	0.0106455	0.0497847	0.0217443	0.0229296	0.0220834	0.0399388	0.0288119	0.0392442	0.020017	0.0532123	0.0120422	0.0232154	0.0251802	0.0145518	0.00635254	0.0232833	0.0377782	0.026141	0.0120688	0.0150009	0.0282664	0.00635254	0.0177488	0.0161357	0.0157623	0.0271609	0.0234494	0.00381152	0.0147244	0.0222104	0.0221187	0.0503768	0.0481633	0.0145621	1.14181	0.89675	0.02713	0.0132349	0.0111529	0.015954	0.00970028	0.00961605	0.00735053	0.00961605	0.00373573	0.017326	0.0132014
