# Supplementary material for: Lower limb kinetic comparisons between the chasse step and one step footwork during stroke play in table tennis
Source: PeerJ. 2021 Nov 11;9:e12481. doi: 10.7717/peerj.12481 (PMC8590798; doi:10.7717/peerj.12481)
Supplement: Supplemental Information 3 [file peerj-09-12481-s003.xlsx]

## Sheet: Chase step
Phase	BP		FP
	0.771871		1.21205
	0.726226		1.27629
	0.882056		1.37546
	0.829593		1.09722
	0.823131		1.32229
	0.80413		1.05404
	0.776332		1.21528
	0.76602		1.34431
	0.686629		1.18648
	0.826318		1.09693
	0.72925		1.1484
	0.791161		1.18547
	0.670121		0.996321
	0.72041		1.11188
	0.785042		1.21488
	0.780764		1.25172
	0.816087		1.06889
	1.60822		0.943518
	1.59588		0.863557
	1.69065		0.798647
	1.55898		0.949584
	1.70368		0.791503
	1.52459		0.596168
	1.46842		0.798603
	1.55411		0.641327
	1.63304		0.742111
	1.48428		0.719567
	1.59212		0.882903
	1.58839		0.966965
	1.80654		0.732714
	1.65342		1.26989
	1.61475		1.42096
	1.31953		1.17444
	1.57865		1.26588
	1.61508		1.2754
	1.54844		1.18347
	1.44892		1.26359
	1.48816		1.30032
	1.52997		1.0498
	1.43117		1.27012
	1.48883		1.25606
	1.52404		1.31642
	1.26231		1.32308
	1.49853		1.28952
	1.59024		1.36636
	1.38093		1.42778
	1.45921		1.39636
	1.6342		1.38731
Mean	1.27209		1.12129
SD	0.383433		0.226478

## Sheet: Cross-step
Phase	BP		FP
	0.984183		0.666676
	1.13127		0.525223
	1.05792		0.375146
	1.23087		0.550111
	0.955724		0.652939
	0.972359		0.56034
	1.12868		0.47585
	0.860622		0.484479
	1.15682		0.609732
	1.09014		0.30385
	1.09604		0.307861
	1.09971		0.538598
	1.09542		1.01242
	1.42888		1.15542
	1.69326		0.616421
	1.46108		0.673736
	1.60714		0.579262
	1.50828		0.651545
	1.573		0.62738
	1.58395		0.825226
	1.53353		0.873074
	1.55144		0.756987
	1.67735		0.651096
	1.57485		0.619205
	1.48724		0.626784
	1.43351		0.352431
	1.79355		0.778106
	1.45464		0.611064
	1.4906		0.664046
	1.50398		0.490721
	1.60544		0.682052
	1.66888		0.525328
	1.40076		1.32261
	1.50413		1.28028
	1.36734		1.13333
	1.35582		1.25168
	1.66292		1.20754
	1.63205		0.987649
	1.72461		1.27415
	1.62042		1.22734
	1.50363		1.25847
	1.42369		1.29541
	1.51306		1.13704
	1.40302		1.38876
	1.60899		1.25985
	1.61168		1.32834
	1.51467		1.19849
	1.56727		1.15752
Mean	1.41468		0.823574
SD	0.237789		0.33138
