# Supplementary material for: Lower limb kinetic comparisons between the chasse step and one step footwork during stroke play in table tennis
Source: PeerJ. 2021 Nov 11;9:e12481. doi: 10.7717/peerj.12481 (PMC8590798; doi:10.7717/peerj.12481)
Supplement: Supplemental Information 5 [file peerj-09-12481-s005.xlsx]

## Sheet: Chasse step
Phase	BP		FP
	161.292		128.653
	129.114		125.053
	160.901		151.865
	147.2		104.449
	164.919		132.672
	151.286		105.431
	144.024		141.027
	152.23		152.323
	123.455		131.41
	157.778		121.086
	127.503		114.219
	150.167		115.16
	142.725		99.849
	147.077		123.323
	143.57		115.101
	158.137		122.433
	124.685		108.554
	161.997		60.627
	143.616		67.962
	154.336		58.68
	133.055		61.545
	144.37		58.357
	155.24		40.646
	149.166		55.675
	149.867		40.843
	156.314		56.693
	135.271		49.046
	161.596		57.653
	160.627		63.955
	155.73		49.303
	153.996		112.085
	160.858		112.661
	186.567		99.134
	185.584		106.645
	192.65		132.27
	191.224		105.797
	171.103		97.717
	193.715		128.319
	188.004		100.844
	171.175		127.911
	199.623		105.51
	184.652		112.058
	191.906		134.358
	176.129		124.608
	188.01		114.906
	185.799		153.476
	179.667		118.392
	194.78		109.585
Mean	161.306		102.289
SD	20.7348		31.8714

## Sheet: Cross-step
Phase	BP		FP
	152.417		88.845
	141.365		60.363
	133.631		45.678
	168.093		73.352
	127.14		61.96
	166.402		68.425
	133.484		56.85
	142.4		56.562
	131.716		57.776
	109.366		43.626
	141.061		50.608
	130.783		51.944
	128.161		72.088
	159.229		97.092
	149.636		41.965
	154.24		40.972
	157.115		31.534
	159.875		38.414
	157.506		35.667
	171.312		56.702
	160.667		72.456
	135.821		46.453
	148.596		40.141
	149.587		35.593
	166.955		42.437
	137.389		21.317
	152.644		78.901
	119.566		43.762
	137.454		52.224
	145.518		33.958
	155.239		60.561
	136.738		47.934
	148.688		92.25
	145.309		106.36
	147.913		102.801
	142.373		96.149
	149.627		131.863
	156.268		101.216
	154.375		115.728
	155.903		114.529
	151.811		118.564
	149.206		130.375
	163.608		111.69
	148.72		119.957
	161.967		108.043
	172.756		99.347
	142.156		94.692
	158.581		114.411
Mean	148.133		72.1695
SD	13.4861		31.0445
