# Supplementary material for: Lower limb kinetic comparisons between the chasse step and one step footwork during stroke play in table tennis
Source: PeerJ. 2021 Nov 11;9:e12481. doi: 10.7717/peerj.12481 (PMC8590798; doi:10.7717/peerj.12481)
Supplement: Supplemental Information 6 [file peerj-09-12481-s006.xlsx]

## Sheet: Chasse step
Phase	BP		FP
	67.275		115.2
	65.025		98.875
	76.5		109.25
	62.8		87.625
	79.275		96.9
	72.675		86.5
	70		101.55
	80.45		93.125
	63.05		105.4
	80.125		110.9
	71.525		99.45
	85.65		94.1
	74.125		85.15
	78.7		104.875
	80.45		92.3
	79.95		106.3
	72.2		72.675
	61.675		78.875
	61.4		56.3
	54.225		64.725
	58.15		59.175
	56.925		68.225
	58.325		59.55
	57.625		63.475
	68.175		51.8
	60.725		71.35
	64.225		65.8
	61.1		75.475
	66.2		64.175
	56.8		57.075
	63.175		96.4
	64.175		75.95
	71.25		75.6
	72.65		73.8
	72		102.35
	78.4		88.3
	70		72.35
	81.45		94
	71		64.2
	65.35		103.45
	78.95		76.95
	72.85		75.55
	80.75		90.15
	67.35		100.65
	73.35		76.6
	68.95		82.2
	73		83.45
	75.55		79.2
Mean	69.6984		83.4859
SD	7.97864		16.6889

## Sheet: Cross-step
Phase	BP		FP
	95.45		51.775
	88.7		42.7
	80.55		32.7
	104		51.675
	88.175		40.875
	90.475		50.2
	94.475		48.925
	81.1		57.575
	96.15		37.8
	76.05		38
	87.7		52.575
	82.8		37.65
	90.4		85.65
	70.75		50.25
	62.4		52.125
	77.425		49.525
	72.375		38.625
	73.1		46.8
	65.25		46.15
	72.15		60.625
	71.2		79.225
	68.025		53.9
	63.675		56.075
	66.65		49.125
	80.2		62.975
	69.075		33.2
	63.225		83.35
	58.55		48.05
	61.7		50.675
	61.8		57.575
	63.1		57.55
	65.6		58.025
	84.125		77.3
	73.125		86.2
	77.225		100.15
	94.25		82.625
	70.125		116.675
	91.375		90.4
	87.825		113.925
	85.975		105.775
	82.475		109.925
	73.375		125.625
	85.8		94.175
	73.25		107.225
	80.775		103.775
	73.625		88.55
	64.75		87.475
	99.55		105.1
Mean	77.9146		67.8505
SD	11.6487		26.1412
